# Supplementary material for: Co-evolution based machine-learning for predicting functional interactions between human genes
Source: PubMed Central journal article supplement (PMC8578642; doi:10.1038/s41467-021-26792-w), 2021-11-09
Supplement: 41467_2021_26792_MOESM1_ESM.pdf [file 41467_2021_26792_MOESM1_ESM.pdf]

**Co-evolution based machine-learning for predicting functional interactions between human genes**

Stupp et al.

# Table of Contents

|                                                                                               |    |
|-----------------------------------------------------------------------------------------------|----|
| Supplementary Note 1 – Comparison to Random Clades.....                                       | 3  |
| Supplementary Note 2 – Description of the Webserver Functionalities .....                     | 4  |
| Supplementary Tables.....                                                                     | 5  |
| Supplementary Table 1 - Clades and Abbreviations .....                                        | 5  |
| Supplementary Table 2 - Random Clades .....                                                   | 7  |
| Supplementary Table 3 – Performance per Phylogenetic Profile Generation Parameters .....      | 9  |
| Supplementary Table 4 - Model Performance .....                                               | 11 |
| Supplementary Table 5 - Parasitic Organisms .....                                             | 12 |
| Supplementary Table 6 – Model Performance Excluding Parasites.....                            | 16 |
| Supplementary Figures.....                                                                    | 17 |
| Supplementary Figure 1 - Clademap .....                                                       | 17 |
| Supplementary Figure 2 – Positive-Unlabeled Learning.....                                     | 19 |
| Supplementary Figure 3 - Comparing Machine Learning Algorithms .....                          | 21 |
| Supplementary Figure 4 – “Young” Genes .....                                                  | 24 |
| Supplementary Figure 5 - Model Performance - Comparing Phylogenetic Profiling Approaches..... | 25 |
| Supplementary Figure 6 – Reactome Temporal Splits.....                                        | 30 |
| Supplementary Figure 7 - External Validation – PPI .....                                      | 31 |
| Supplementary Figure 8 - External Validation – KEGG.....                                      | 33 |
| Supplementary Figure 9 - External Validation – Complexes (Functional Interaction Model) ..... | 34 |
| Supplementary Figure 10 - External Validation – Complexes (In Complex Model).....             | 36 |
| Supplementary Figure 11 - Performance Comparison on the Pathway Level.....                    | 38 |
| Supplementary Figure 12 - Clusters.....                                                       | 40 |
| Supplementary Figure 13 - Distribution of Pubmed Mentions .....                               | 41 |
| Supplementary Figure 14 – PathScore Distribution.....                                         | 42 |
| Supplementary Figure 15 – PathScore Performance.....                                          | 45 |
| Supplementary Figure 16 - Clade Importance - Interaction Context Models .....                 | 47 |
| Supplementary Figure 17 - UMAP Projection of SHAP Values for Gene Pairs .....                 | 48 |
| Supplementary Figure 18 – Clade Importance of Models Excluding Parasites .....                | 49 |
| Supplementary References .....                                                                | 50 |

## Supplementary Note 1 – Comparison to Random Clades

Local co-evolution tries to identify functionally interacting genes by their phylogenetic profiling similarity in specific clades. However, it remains unclear how sensitive is the model to the phylogenetic tree structure, i.e. how does clade composition affect performance. To investigate this question, we trained the model on randomized species permutations, thus the composition of each clade is random and independent of evolution. We also compared the original model to a model trained with 20% of the species by taking every fifth species and duplicating each of these species five times. This “small” tree model has the covariance for each gene-pair in each clade scaled by a multiple of five from a true subsampling, and thus directly proportional, and provides the same information for a decision-tree based model. This sampling procedure is important, as some clades are as large as a third of the eukaryotic tree. Thus, a random sample of species with the size of a third of the species is likely to be more informative than the “small” (subsampling) tree model for all species. The models were trained in 4-fold cross-validation and performance was measured by the area under the receiver operator characteristics curve (auROC) for all gene-pairs and for gene-pairs excluding paralogs. Results (supp. Table 1) show that the original model, trained on the true permutation and all species, outperformed the random and the “small” models in most comparisons. For some of the labels tested such as Reactome (functional interaction as pathway co-occurrence, see Methods), Reactome complex, and signal transduction, the model shows little to no improvement over the random clades. This may be related to the high clade importance of the bigger clades, particularly Eukaryota and Fungi, in the original model for these labels (Figure 4a,c, Reactome complex not shown). For the other labels, “small” is close in performance to the original model while random permutations are lower in both.

## Supplementary Note 2 – Description of the Webserver Functionalities

This manuscript is accompanied by a webserver found at: <https://mlpp.cs.huji.ac.il> This webserver enables the user to explore the predictions made by the models presented in this manuscript. In addition to predictions, this site features contextual information from various sources to facilitate a deeper understanding of the presented predictions. The webserver enables the user to explore 3 main functionalities which recapitulate analyses performed in this manuscript:

1. Prediction of functional interaction between pairs of human genes – In the tab “Functional Interaction Prediction” the user can select a gene of interest and explore the predicted functional interactions of this gene with all other human genes. The user can select to view predictions for functional interaction as well as each of the other labels described in the paper – complexes, Reactome pathway types, and GO pathway types from the dropdown menu at the top of the page. Only the top 100 predicted genes are displayed, to get the full list the user can click to download a CSV file.
2. Prediction of functional interactions for gene sets – In the tab “Gene Set Interaction Prediction” the user can select a gene set and display the prediction of interactions between them. The webserver generates plots that display the phylogenetic profile of these genes (similar to Figure 3, Supp. Figure 12), and the prediction scores heatmap (similar to Figure 2). The user can choose to explore both established gene sets from Reactome, KEGG, GO and other sources (by selecting known gene set), or select genes to assemble a gene set of interest (by selecting custom gene set). For known gene sets, the webserver displays a description of the gene set when available.
3. Functional annotation of genes using PathScore – In the tab “Functional Annotation (“PathScore”)” the user can select a gene and explore its association with the various pathway types considered in this manuscript. This yields information akin to Figure 4C per gene. The tab is further augmented with information about the gene from uniprot and GO when available, with links to the source.

Further instructions and examples can be found on the homepage of the webserver.

## Supplementary Tables

### Supplementary Table 1 - Clades and Abbreviations

| Clade                 | Abbreviation |
|-----------------------|--------------|
| Aconoidasida          | Acono.       |
| Agaricales            | Agari.4      |
| Agaricomycetes        | Agari.2      |
| Agaricomycetidae      | Agari.3      |
| Agaricomycotina       | Agari.1      |
| Alveolata             | Alveo.       |
| Anopheles             | Anoph.1      |
| Archelosauria         | Arch.1       |
| Arthropoda            | Arthro.      |
| Ascomycota            | Asco.        |
| Aspergillus           | Asper.2      |
| Asterids              | aster.       |
| Basidiomycota         | Basido.      |
| Boletales             | Bolet.       |
| Bop_Clade             | BOP          |
| Brachycera            | Barchy.      |
| Capnodiales           | Capno.       |
| Catarrhini            | Catarr.      |
| Chaetothyriomycetidae | Chaeto.1     |
| Chlorophyta           | Chloro.      |
| Chordata              | Chord.       |
| Chromadorea           | Chroma.      |
| Clavicipitaceae       | Clavici.     |
| Conoidasida           | Conoi.       |
| Debaryomycetaceae     | Debar.       |
| Digenea               | Digen.       |
| Diptera               | Diptera      |
| Dorylaimia            | Doryl.       |
| Dothideomycetes       | Dothid.1     |
| Dothideomycetidae     | Dothid.2     |
| Ecdysozoa             | Ecdys.       |
| Ephydroidea           | Ephyd.       |
| Euarchoptoglires      | Euarcho.     |
| Eudicotyledons        | eudicot.     |
| Euglenozoa            | Euglen.      |

| Clade (cont.)      | Abbreviation (cont.) |
|--------------------|----------------------|
| Glomerellales      | Glomer.1             |
| Helotiales         | Helo.                |
| Hymenoptera        | Hymen.               |
| Hypocreaceae       | Hypoc.3              |
| Hypocreales        | Hypoc.2              |
| Hypocreomycetidae  | Hypoc.1              |
| Lamiids            | lamiids              |
| Laurasiatheria     | Lauras.              |
| Leotiomycetes      | Leo.                 |
| Liliopsida         | Lilio.               |
| Malvids            | malvids              |
| Mammalia           | Mammalia             |
| Metazoa            | Metazoa              |
| Microsporidia      | Micro.               |
| Mucoromycota       | Mucor.               |
| Mycosphaerellaceae | Mycos.               |
| Nectriaceae        | Nectr.               |
| Nematocera         | Nematocera           |
| Nematoda           | Nematoda             |
| Neopterygii        | Neop.                |
| Onygenales         | Onyg.                |
| Oomycetes          | Oomyc.               |
| Penicillium        | Penicill.            |
| Pezizomycotina     | Pezizo               |
| Plasmodiidae       | Plasm.2              |
| Platyhelminthes    | Platy.               |
| Pleosporineae      | Pleos.3              |
| Pleosporomycetidae | Pleos.2              |
| Poales             | Poales               |
| Polyporales        | Polyp.               |
| Primates           | Primates             |
| Pucciniomycotina   | Pucci.               |
| Rhabditina         | Rhabd.2              |
| Rosids             | rosids               |
| Saccharomycetaceae | Sacch.4              |

|                      |           |
|----------------------|-----------|
| Eukaryota            | Eukaryota |
| Eurotiales           | Euro.3    |
| Eurotiomycetes       | Euro.1    |
| Eurotiomycetidae     | Euro.2    |
| Fabids               | fabids    |
| Formicidae           | Formi.2   |
| Fungi                | Fungi     |
| Fungi_Incertae_Sedis | Fungi.IS  |
| Glires               | Glires    |

|                    |          |
|--------------------|----------|
| Saccharomycotina   | Sacch.3  |
| Sordariomycetes    | Sord.1   |
| Sordariomycetidae  | Sord.2   |
| Spirurina          | Spirur.  |
| Stramenopiles      | Stram.   |
| Taphrinomycotina   | Taphir.  |
| Tremellomycetes    | Tremel.1 |
| Ustilaginomycotina | Ustil.   |
| Viridiplantae      | Virid.   |

**Clades and Abbreviations** - Clades and abbreviations used in this paper. Clades marked in blue are the 49 clades used for generating the models (see Methods).

**Supplementary Table 2 - Random Clades**

| Target                | Clades | Unfiltered |       |       |       |       | Paralogs filtered |       |       |       |       |
|-----------------------|--------|------------|-------|-------|-------|-------|-------------------|-------|-------|-------|-------|
|                       |        | Train      | Test  | C1    | C2    | C3    | Train             | Test  | C1    | C2    | C3    |
| KEGG                  | orig   | 0.842      | 0.800 | 0.838 | 0.792 | 0.783 | 0.839             | 0.795 | 0.835 | 0.789 | 0.762 |
| KEGG                  | small  | 0.842      | 0.805 | 0.837 | 0.797 | 0.793 | 0.839             | 0.799 | 0.835 | 0.794 | 0.771 |
| KEGG                  | rand_1 | 0.806      | 0.756 | 0.797 | 0.752 | 0.706 | 0.807             | 0.757 | 0.798 | 0.751 | 0.712 |
| KEGG                  | rand_2 | 0.817      | 0.766 | 0.812 | 0.760 | 0.720 | 0.818             | 0.767 | 0.813 | 0.760 | 0.720 |
| KEGG                  | rand_3 | 0.817      | 0.764 | 0.812 | 0.757 | 0.717 | 0.817             | 0.763 | 0.811 | 0.756 | 0.714 |
| KEGG                  | rand_4 | 0.805      | 0.757 | 0.799 | 0.753 | 0.708 | 0.807             | 0.760 | 0.801 | 0.753 | 0.719 |
| Reactome              | orig   | 0.741      | 0.724 | 0.737 | 0.713 | 0.736 | 0.733             | 0.713 | 0.729 | 0.708 | 0.713 |
| Reactome              | small  | 0.733      | 0.717 | 0.729 | 0.706 | 0.730 | 0.726             | 0.708 | 0.722 | 0.703 | 0.710 |
| Reactome              | rand_1 | 0.717      | 0.720 | 0.711 | 0.713 | 0.734 | 0.715             | 0.717 | 0.709 | 0.714 | 0.727 |
| Reactome              | rand_2 | 0.725      | 0.722 | 0.720 | 0.714 | 0.732 | 0.723             | 0.718 | 0.717 | 0.714 | 0.726 |
| Reactome              | rand_3 | 0.728      | 0.717 | 0.724 | 0.708 | 0.723 | 0.725             | 0.711 | 0.720 | 0.707 | 0.708 |
| Reactome              | rand_4 | 0.719      | 0.719 | 0.712 | 0.711 | 0.732 | 0.717             | 0.715 | 0.710 | 0.712 | 0.724 |
| Complexes Reactome    | orig   | 0.787      | 0.771 | 0.777 | 0.760 | 0.787 | 0.782             | 0.766 | 0.772 | 0.761 | 0.779 |
| Complexes Reactome    | small  | 0.776      | 0.764 | 0.764 | 0.756 | 0.780 | 0.772             | 0.761 | 0.761 | 0.756 | 0.776 |
| Complexes Reactome    | rand_1 | 0.753      | 0.765 | 0.742 | 0.763 | 0.781 | 0.754             | 0.767 | 0.743 | 0.766 | 0.796 |
| Complexes Reactome    | rand_2 | 0.764      | 0.771 | 0.754 | 0.767 | 0.788 | 0.765             | 0.772 | 0.754 | 0.771 | 0.800 |
| Complexes Reactome    | rand_3 | 0.767      | 0.759 | 0.757 | 0.755 | 0.767 | 0.768             | 0.760 | 0.758 | 0.758 | 0.772 |
| Complexes Reactome    | rand_4 | 0.756      | 0.760 | 0.745 | 0.756 | 0.774 | 0.757             | 0.761 | 0.745 | 0.759 | 0.782 |
| Developmental Biology | orig   | 0.896      | 0.873 | 0.868 | 0.864 | 0.883 | 0.896             | 0.865 | 0.866 | 0.861 | 0.857 |
| Developmental Biology | small  | 0.898      | 0.871 | 0.867 | 0.862 | 0.873 | 0.897             | 0.864 | 0.862 | 0.860 | 0.849 |
| Developmental Biology | rand_1 | 0.885      | 0.853 | 0.856 | 0.843 | 0.850 | 0.883             | 0.849 | 0.853 | 0.845 | 0.829 |
| Developmental Biology | rand_2 | 0.889      | 0.858 | 0.862 | 0.851 | 0.856 | 0.887             | 0.854 | 0.859 | 0.850 | 0.842 |
| Developmental Biology | rand_3 | 0.891      | 0.856 | 0.859 | 0.847 | 0.855 | 0.889             | 0.849 | 0.856 | 0.845 | 0.830 |
| Developmental Biology | rand_4 | 0.889      | 0.858 | 0.865 | 0.847 | 0.854 | 0.887             | 0.853 | 0.861 | 0.846 | 0.834 |
| Metabolism            | orig   | 0.837      | 0.832 | 0.825 | 0.821 | 0.864 | 0.834             | 0.820 | 0.820 | 0.817 | 0.819 |
| Metabolism            | small  | 0.839      | 0.840 | 0.826 | 0.831 | 0.881 | 0.835             | 0.829 | 0.821 | 0.827 | 0.839 |
| Metabolism            | rand_1 | 0.801      | 0.787 | 0.787 | 0.780 | 0.789 | 0.801             | 0.784 | 0.786 | 0.781 | 0.772 |
| Metabolism            | rand_2 | 0.807      | 0.789 | 0.793 | 0.779 | 0.800 | 0.807             | 0.783 | 0.793 | 0.779 | 0.770 |
| Metabolism            | rand_3 | 0.812      | 0.791 | 0.797 | 0.778 | 0.801 | 0.811             | 0.783 | 0.797 | 0.777 | 0.765 |
| Metabolism            | rand_4 | 0.801      | 0.782 | 0.784 | 0.774 | 0.784 | 0.802             | 0.778 | 0.784 | 0.774 | 0.765 |
| DNA Repair            | orig   | 0.929      | 0.901 | 0.907 | 0.897 | 0.916 | 0.929             | 0.899 | 0.907 | 0.898 | 0.888 |
| DNA Repair            | small  | 0.922      | 0.895 | 0.898 | 0.890 | 0.918 | 0.924             | 0.893 | 0.898 | 0.890 | 0.885 |
| DNA Repair            | rand_1 | 0.906      | 0.863 | 0.866 | 0.854 | 0.897 | 0.906             | 0.857 | 0.866 | 0.849 | 0.847 |
| DNA Repair            | rand_2 | 0.916      | 0.876 | 0.882 | 0.867 | 0.901 | 0.916             | 0.871 | 0.881 | 0.865 | 0.855 |
| DNA Repair            | rand_3 | 0.897      | 0.848 | 0.857 | 0.836 | 0.878 | 0.898             | 0.845 | 0.856 | 0.838 | 0.830 |
| DNA Repair            | rand_4 | 0.903      | 0.854 | 0.863 | 0.846 | 0.878 | 0.904             | 0.852 | 0.865 | 0.846 | 0.840 |

|                     |        |       |       |       |       |       |       |       |       |       |       |
|---------------------|--------|-------|-------|-------|-------|-------|-------|-------|-------|-------|-------|
| Signal Transduction | orig   | 0.794 | 0.780 | 0.775 | 0.770 | 0.793 | 0.789 | 0.770 | 0.768 | 0.765 | 0.779 |
| Signal Transduction | small  | 0.795 | 0.781 | 0.778 | 0.772 | 0.789 | 0.791 | 0.775 | 0.773 | 0.770 | 0.782 |
| Signal Transduction | rand_1 | 0.794 | 0.773 | 0.782 | 0.769 | 0.763 | 0.790 | 0.772 | 0.776 | 0.767 | 0.771 |
| Signal Transduction | rand_2 | 0.803 | 0.776 | 0.789 | 0.772 | 0.767 | 0.799 | 0.775 | 0.784 | 0.770 | 0.776 |
| Signal Transduction | rand_3 | 0.798 | 0.770 | 0.786 | 0.759 | 0.764 | 0.793 | 0.762 | 0.780 | 0.756 | 0.749 |
| Signal Transduction | rand_4 | 0.800 | 0.775 | 0.787 | 0.771 | 0.766 | 0.796 | 0.774 | 0.782 | 0.769 | 0.775 |

**Random Clades** – Model performance as measured by the mean auROC across four cross-validations for Functional Interaction models trained on KEGG or Reactome, or Interaction Context models for Complexes, Developmental Biology, Metabolism, DNA Repair or Signal Transduction compared for using all clades (“orig”), five random permutations (“rand\_1”-“rand\_4”) or a subsample of 20% of species (“small”). A blue gradient ranks the best performing models from best to worst (blue to white, respectively). C1, C2, and C3 are stratifications for pairwise prediction for pairs of genes appearing both in the training set, one appearing in the training set, and not appearing in the training set, respectively (see Methods, based on <sup>1</sup>). Model evaluation was conducted with pairs of paralogs (unfiltered) or without (Paralogs filtered). More details of the comparison are given in the Supp. Text.



**Supplementary Table 3 – Performance per Phylogenetic Profile Generation Parameters**

| Paralog filtering   | Method Type    | PP Matrix            | Distance | Train       |             |             |             |             |             | Test |     |          |     |      |     |
|---------------------|----------------|----------------------|----------|-------------|-------------|-------------|-------------|-------------|-------------|------|-----|----------|-----|------|-----|
|                     |                |                      |          | AUC         |             | pAUC 0.1    |             | AP          |             | AUC  |     | pAUC 0.1 |     | AP   |     |
|                     |                |                      |          | mean        | std         | mean        | std         | mean        | std         | mean | std | mean     | std | mean | std |
| Paralogs Unfiltered | All Eukaryotes | BLAST E-value        | Hamming  | 0.640 ±0.01 | 0.562 ±0.00 | 0.640 ±0.00 | 0.644 ±0.00 | 0.578 ±0.00 | 0.674 ±0.00 |      |     |          |     |      |     |
|                     |                | BLAST E-value        | Jaccard  | 0.689 ±0.01 | 0.568 ±0.00 | 0.672 ±0.00 | 0.675 ±0.00 | 0.575 ±0.00 | 0.688 ±0.00 |      |     |          |     |      |     |
|                     |                | NPP                  | Pearson  | 0.608 ±0.01 | 0.550 ±0.00 | 0.620 ±0.01 | 0.599 ±0.00 | 0.568 ±0.00 | 0.651 ±0.00 |      |     |          |     |      |     |
|                     |                | BLAST E-value        | Cov.     | 0.481 ±0.01 | 0.524 ±0.00 | 0.517 ±0.01 | 0.460 ±0.00 | 0.525 ±0.00 | 0.538 ±0.00 |      |     |          |     |      |     |
|                     |                | Len. norm. (T=bs40)  | Cov.     | 0.571 ±0.01 | 0.527 ±0.00 | 0.564 ±0.01 | 0.573 ±0.01 | 0.537 ±0.00 | 0.600 ±0.01 |      |     |          |     |      |     |
|                     |                | Len. norm. (T=bs60)  | Cov.     | 0.571 ±0.01 | 0.526 ±0.00 | 0.563 ±0.01 | 0.570 ±0.01 | 0.535 ±0.00 | 0.595 ±0.01 |      |     |          |     |      |     |
|                     |                | Len. norm. (T=bs100) | Cov.     | 0.578 ±0.01 | 0.526 ±0.00 | 0.566 ±0.01 | 0.571 ±0.01 | 0.533 ±0.00 | 0.593 ±0.01 |      |     |          |     |      |     |
|                     | MLPP           | BLAST E-value        | Hamming  | 0.744 ±0.00 | 0.583 ±0.00 | 0.716 ±0.01 | 0.706 ±0.00 | 0.578 ±0.00 | 0.707 ±0.00 |      |     |          |     |      |     |
|                     |                | BLAST E-value        | Jaccard  | 0.756 ±0.00 | 0.588 ±0.00 | 0.726 ±0.01 | 0.713 ±0.00 | 0.573 ±0.00 | 0.707 ±0.00 |      |     |          |     |      |     |
|                     |                | NPP                  | Pearson  | 0.711 ±0.01 | 0.598 ±0.00 | 0.717 ±0.00 | 0.697 ±0.00 | 0.601 ±0.00 | 0.726 ±0.00 |      |     |          |     |      |     |
|                     |                | BLAST E-value        | Cov.     | 0.707 ±0.00 | 0.582 ±0.00 | 0.699 ±0.01 | 0.674 ±0.01 | 0.558 ±0.00 | 0.678 ±0.01 |      |     |          |     |      |     |
|                     |                | Len. norm. (T=bs40)  | Cov.     | 0.746 ±0.00 | 0.608 ±0.01 | 0.741 ±0.01 | 0.727 ±0.00 | 0.595 ±0.00 | 0.737 ±0.00 |      |     |          |     |      |     |
|                     |                | Len. norm. (T=bs60)  | Cov.     | 0.742 ±0.00 | 0.610 ±0.01 | 0.741 ±0.01 | 0.725 ±0.00 | 0.593 ±0.00 | 0.734 ±0.00 |      |     |          |     |      |     |
|                     |                | Len. norm. (T=bs100) | Cov.     | 0.735 ±0.00 | 0.609 ±0.00 | 0.735 ±0.00 | 0.716 ±0.00 | 0.588 ±0.00 | 0.725 ±0.00 |      |     |          |     |      |     |
| Paralogs Filtered   | All Eukaryotes | BLAST E-value        | Hamming  | 0.620 ±0.01 | 0.546 ±0.00 | 0.596 ±0.00 | 0.609 ±0.00 | 0.550 ±0.00 | 0.604 ±0.00 |      |     |          |     |      |     |
|                     |                | BLAST E-value        | Jaccard  | 0.672 ±0.01 | 0.556 ±0.00 | 0.634 ±0.00 | 0.644 ±0.00 | 0.552 ±0.00 | 0.626 ±0.00 |      |     |          |     |      |     |
|                     |                | NPP                  | Pearson  | 0.586 ±0.01 | 0.529 ±0.00 | 0.563 ±0.01 | 0.561 ±0.00 | 0.533 ±0.00 | 0.564 ±0.01 |      |     |          |     |      |     |
|                     |                | BLAST E-value        | Cov.     | 0.463 ±0.01 | 0.511 ±0.00 | 0.471 ±0.01 | 0.431 ±0.00 | 0.504 ±0.00 | 0.462 ±0.00 |      |     |          |     |      |     |
|                     |                | Len. norm. (T=bs40)  | Cov.     | 0.564 ±0.01 | 0.524 ±0.00 | 0.539 ±0.01 | 0.558 ±0.01 | 0.530 ±0.00 | 0.556 ±0.01 |      |     |          |     |      |     |
|                     |                | Len. norm. (T=bs60)  | Cov.     | 0.563 ±0.01 | 0.523 ±0.00 | 0.538 ±0.01 | 0.556 ±0.01 | 0.528 ±0.00 | 0.551 ±0.01 |      |     |          |     |      |     |
|                     |                | Len. norm. (T=bs100) | Cov.     | 0.571 ±0.01 | 0.523 ±0.00 | 0.541 ±0.01 | 0.557 ±0.01 | 0.527 ±0.00 | 0.550 ±0.01 |      |     |          |     |      |     |
|                     | MLPP           | BLAST E-value        | Hamming  | 0.729 ±0.00 | 0.565 ±0.00 | 0.677 ±0.01 | 0.678 ±0.00 | 0.550 ±0.00 | 0.642 ±0.01 |      |     |          |     |      |     |
|                     |                | BLAST E-value        | Jaccard  | 0.743 ±0.00 | 0.573 ±0.00 | 0.693 ±0.01 | 0.687 ±0.00 | 0.554 ±0.00 | 0.651 ±0.00 |      |     |          |     |      |     |
|                     |                | NPP                  | Pearson  | 0.694 ±0.01 | 0.577 ±0.00 | 0.673 ±0.00 | 0.668 ±0.00 | 0.568 ±0.00 | 0.659 ±0.00 |      |     |          |     |      |     |
|                     |                | BLAST E-value        | Cov.     | 0.691 ±0.00 | 0.563 ±0.00 | 0.657 ±0.01 | 0.648 ±0.01 | 0.531 ±0.00 | 0.611 ±0.01 |      |     |          |     |      |     |
|                     |                | Len. norm. (T=bs40)  | Cov.     | 0.738 ±0.00 | 0.601 ±0.01 | 0.720 ±0.01 | 0.716 ±0.00 | 0.587 ±0.00 | 0.703 ±0.00 |      |     |          |     |      |     |
|                     |                | Len. norm. (T=bs60)  | Cov.     | 0.734 ±0.00 | 0.603 ±0.01 | 0.719 ±0.01 | 0.712 ±0.00 | 0.585 ±0.00 | 0.700 ±0.00 |      |     |          |     |      |     |
|                     |                | Len. norm. (T=bs100) | Cov.     | 0.727 ±0.00 | 0.602 ±0.00 | 0.712 ±0.00 | 0.702 ±0.00 | 0.580 ±0.00 | 0.690 ±0.00 |      |     |          |     |      |     |

| Paralogs filtering  | Method Type    | PP Matrix            | Distance | C1          |             |             |             |             |             | C2          |             |             |     |      |     | C3   |     |          |     |      |     |
|---------------------|----------------|----------------------|----------|-------------|-------------|-------------|-------------|-------------|-------------|-------------|-------------|-------------|-----|------|-----|------|-----|----------|-----|------|-----|
|                     |                |                      |          | AUC         |             | pAUC 0.1    |             | AP          |             | AUC         |             | pAUC 0.1    |     | AP   |     | AUC  |     | pAUC 0.1 |     | AP   |     |
|                     |                |                      |          | mean        | std         | mean        | std         | mean        | std         | mean        | std         | mean        | std | mean | std | mean | std | mean     | std | mean | std |
| Paralogs Unfiltered | All Eukaryotes | BLAST E-value        | Hamming  | 0.641 ±0.01 | 0.563 ±0.00 | 0.654 ±0.01 | 0.622 ±0.00 | 0.559 ±0.00 | 0.626 ±0.01 | 0.698 ±0.01 | 0.625 ±0.01 | 0.779 ±0.00 |     |      |     |      |     |          |     |      |     |
|                     |                | BLAST E-value        | Jaccard  | 0.690 ±0.01 | 0.567 ±0.00 | 0.685 ±0.01 | 0.656 ±0.00 | 0.559 ±0.00 | 0.644 ±0.01 | 0.709 ±0.01 | 0.614 ±0.01 | 0.781 ±0.00 |     |      |     |      |     |          |     |      |     |
|                     |                | NPP                  | Pearson  | 0.609 ±0.01 | 0.553 ±0.00 | 0.634 ±0.01 | 0.574 ±0.00 | 0.547 ±0.00 | 0.597 ±0.01 | 0.657 ±0.01 | 0.625 ±0.01 | 0.771 ±0.01 |     |      |     |      |     |          |     |      |     |
|                     |                | BLAST E-value        | Cov.     | 0.483 ±0.01 | 0.525 ±0.00 | 0.534 ±0.01 | 0.444 ±0.00 | 0.515 ±0.00 | 0.494 ±0.00 | 0.489 ±0.01 | 0.547 ±0.01 | 0.649 ±0.01 |     |      |     |      |     |          |     |      |     |
|                     |                | Len. norm. (T=bs40)  | Cov.     | 0.574 ±0.02 | 0.528 ±0.00 | 0.580 ±0.01 | 0.565 ±0.01 | 0.534 ±0.00 | 0.569 ±0.01 | 0.588 ±0.01 | 0.552 ±0.01 | 0.687 ±0.02 |     |      |     |      |     |          |     |      |     |
|                     |                | Len. norm. (T=bs60)  | Cov.     | 0.574 ±0.01 | 0.526 ±0.00 | 0.578 ±0.01 | 0.563 ±0.01 | 0.532 ±0.00 | 0.565 ±0.01 | 0.585 ±0.01 | 0.548 ±0.00 | 0.681 ±0.02 |     |      |     |      |     |          |     |      |     |
|                     |                | Len. norm. (T=bs100) | Cov.     | 0.581 ±0.01 | 0.526 ±0.00 | 0.582 ±0.01 | 0.564 ±0.01 | 0.530 ±0.00 | 0.563 ±0.01 | 0.582 ±0.01 | 0.545 ±0.00 | 0.678 ±0.01 |     |      |     |      |     |          |     |      |     |
|                     | MLPP           | BLAST E-value        | Hamming  | 0.733 ±0.01 | 0.579 ±0.00 | 0.718 ±0.01 | 0.693 ±0.01 | 0.561 ±0.00 | 0.667 ±0.01 | 0.721 ±0.01 | 0.617 ±0.00 | 0.787 ±0.01 |     |      |     |      |     |          |     |      |     |
|                     |                | BLAST E-value        | Jaccard  | 0.744 ±0.01 | 0.582 ±0.00 | 0.727 ±0.01 | 0.701 ±0.00 | 0.561 ±0.00 | 0.671 ±0.00 | 0.717 ±0.01 | 0.589 ±0.01 | 0.773 ±0.01 |     |      |     |      |     |          |     |      |     |
|                     |                | NPP                  | Pearson  | 0.686 ±0.01 | 0.586 ±0.00 | 0.704 ±0.01 | 0.678 ±0.00 | 0.581 ±0.00 | 0.684 ±0.00 | 0.750 ±0.01 | 0.649 ±0.00 | 0.821 ±0.01 |     |      |     |      |     |          |     |      |     |
|                     |                | BLAST E-value        | Cov.     | 0.691 ±0.01 | 0.569 ±0.00 | 0.691 ±0.00 | 0.663 ±0.01 | 0.546 ±0.00 | 0.643 ±0.01 | 0.685 ±0.01 | 0.578 ±0.01 | 0.750 ±0.01 |     |      |     |      |     |          |     |      |     |
|                     |                | Len. norm. (T=bs40)  | Cov.     | 0.730 ±0.01 | 0.594 ±0.00 | 0.732 ±0.01 | 0.719 ±0.00 | 0.588 ±0.00 | 0.710 ±0.01 | 0.744 ±0.01 | 0.613 ±0.01 | 0.804 ±0.01 |     |      |     |      |     |          |     |      |     |
|                     |                | Len. norm. (T=bs60)  | Cov.     | 0.729 ±0.01 | 0.595 ±0.01 | 0.732 ±0.01 | 0.716 ±0.00 | 0.586 ±0.00 | 0.706 ±0.00 | 0.745 ±0.01 | 0.608 ±0.01 | 0.802 ±0.01 |     |      |     |      |     |          |     |      |     |
|                     |                | Len. norm. (T=bs100) | Cov.     | 0.725 ±0.01 | 0.595 ±0.01 | 0.728 ±0.01 | 0.708 ±0.00 | 0.580 ±0.00 | 0.699 ±0.00 | 0.725 ±0.01 | 0.598 ±0.01 | 0.787 ±0.01 |     |      |     |      |     |          |     |      |     |
| Paralogs Filtered   | All Eukaryotes | BLAST E-value        | Hamming  | 0.621 ±0.01 | 0.547 ±0.00 | 0.610 ±0.01 | 0.605 ±0.00 | 0.547 ±0.00 | 0.591 ±0.01 | 0.613 ±0.01 | 0.565 ±0.00 | 0.642 ±0.01 |     |      |     |      |     |          |     |      |     |
|                     |                | BLAST E-value        | Jaccard  | 0.673 ±0.01 | 0.554 ±0.01 | 0.646 ±0.01 | 0.642 ±0.00 | 0.549 ±0.00 | 0.614 ±0.01 | 0.633 ±0.01 | 0.567 ±0.00 | 0.653 ±0.01 |     |      |     |      |     |          |     |      |     |
|                     |                | NPP                  | Pearson  | 0.587 ±0.01 | 0.531 ±0.00 | 0.577 ±0.01 | 0.556 ±0.00 | 0.531 ±0.00 | 0.551 ±0.01 | 0.561 ±0.01 | 0.541 ±0.01 | 0.598 ±0.02 |     |      |     |      |     |          |     |      |     |
|                     |                | BLAST E-value        | Cov.     | 0.465 ±0.01 | 0.512 ±0.00 | 0.487 ±0.01 | 0.428 ±0.01 | 0.504 ±0.00 | 0.452 ±0.01 | 0.414 ±0.01 | 0.500 ±0.00 | 0.482 ±0.02 |     |      |     |      |     |          |     |      |     |
|                     |                | Len. norm. (T=bs40)  | Cov.     | 0.567 ±0.01 | 0.525 ±0.00 | 0.555 ±0.01 | 0.557 ±0.01 | 0.530 ±0.00 | 0.548 ±0.01 | 0.554 ±0.01 | 0.534 ±0.01 | 0.583 ±0.02 |     |      |     |      |     |          |     |      |     |
|                     |                | Len. norm. (T=bs60)  | Cov.     | 0.567 ±0.01 | 0.523 ±0.00 | 0.553 ±0.01 | 0.555 ±0.01 | 0.528 ±0.00 | 0.544 ±0.01 | 0.550 ±0.01 | 0.530 ±0.01 | 0.576 ±0.02 |     |      |     |      |     |          |     |      |     |
|                     |                | Len. norm. (T=bs100) | Cov.     | 0.574 ±0.01 | 0.523 ±0.00 | 0.557 ±0.01 | 0.556 ±0.01 | 0.527 ±0.00 | 0.542 ±0.01 | 0.546 ±0.01 | 0.528 ±0.00 | 0.570 ±0.02 |     |      |     |      |     |          |     |      |     |
|                     | MLPP           | BLAST E-value        | Hamming  | 0.717 ±0.01 | 0.561 ±0.01 | 0.678 ±0.01 | 0.679 ±0.01 | 0.548 ±0.00 | 0.634 ±0.01 | 0.645 ±0.01 | 0.557 ±0.00 | 0.652 ±0.01 |     |      |     |      |     |          |     |      |     |
|                     |                | BLAST E-value        | Jaccard  | 0.730 ±0.01 | 0.567 ±0.01 | 0.692 ±0.01 | 0.689 ±0.01 | 0.551 ±0.00 | 0.643 ±0.01 | 0.652 ±0.01 | 0.561 ±0.00 | 0.658 ±0.01 |     |      |     |      |     |          |     |      |     |
|                     |                | NPP                  | Pearson  | 0.667 ±0.01 | 0.563 ±0.00 | 0.656 ±0.01 | 0.664 ±0.00 | 0.565 ±0.00 | 0.645 ±0.01 | 0.683 ±0.01 | 0.583 ±0.00 | 0.701 ±0.01 |     |      |     |      |     |          |     |      |     |
|                     |                | BLAST E-value        | Cov.     | 0.674 ±0.01 | 0.550 ±0.00 | 0.646 ±0.00 | 0.649 ±0.01 | 0.531 ±0.00 | 0.603 ±0.01 | 0.625 ±0.01 | 0.517 ±0.00 | 0.609 ±0.02 |     |      |     |      |     |          |     |      |     |
|                     |                | Len. norm. (T=bs40)  | Cov.     | 0.722 ±0.01 | 0.588 ±0.00 | 0.709 ±0.01 | 0.713 ±0.00 | 0.585 ±0.00 | 0.693 ±0.01 | 0.723 ±0.01 | 0.593 ±0.01 | 0.731 ±0.01 |     |      |     |      |     |          |     |      |     |
|                     |                | Len. norm. (T=bs60)  | Cov.     | 0.720 ±0.01 | 0.589 ±0.01 | 0.709 ±0.01 | 0.709 ±0.00 | 0.582 ±0.00 | 0.689 ±0.01 | 0.721 ±0.01 | 0.590 ±0.01 | 0.727 ±0.01 |     |      |     |      |     |          |     |      |     |
|                     |                | Len. norm. (T=bs100) | Cov.     | 0.715 ±0.01 | 0.588 ±0.00 | 0.705 ±0.01 | 0.701 ±0.00 | 0.577 ±0.00 | 0.681 ±0.01 | 0.698 ±0.01 | 0.585 ±0.01 | 0.711 ±0.01 |     |      |     |      |     |          |     |      |     |

**Phylogenetic Profiling Generation Performance** – blast bitscore (40, 60, 100) and E-value (1e-3) thresholds as well as various normalization (NPP, length normalization, binarization – “BLAST E-value”) and distance metrics (“Hamming”, “Jaccard”, “Pearson” – Pearson correlation, and “Cov.” - covariance) are compared based on performance in predicting functional interactions in Reactome. Comparisons are conducted with the complete machine learning pipeline (MLPP) or using just one clade – all Eukaryotes. Comparisons are stratified based on including pairs of paralogous genes (“Paralogs Unfiltered”) or filtering them (“Paralogs Filtered”). C1, C2, and C3 are stratifications for pairwise prediction with both, one or none of the genes in a pair appear in the training set, respectively (see Methods, based on <sup>1</sup>). Performance is measured as auROC, partial ROC AUC at FPR 0.1 (pAUC) and average precision (AP), and presented as the mean ± standard deviation across five cross validation folds.

**Supplementary Table 4 - Model Performance**

| Metric          | Split | Unf It |       |       |       |       | Paralogs f Itered |       |       |       |
|-----------------|-------|--------|-------|-------|-------|-------|-------------------|-------|-------|-------|
|                 |       | MLPP   | NPP   | SVDp  | PPP   | BPP   | MLPP              | NPP   | SVDp  | PPP   |
| AUC             | Train | 0.759  | 0.617 | 0.617 | 0.626 | 0.639 | 0.747             | 0.593 | 0.594 | 0.599 |
|                 | Test  | 0.731  | 0.596 | 0.592 | 0.632 | 0.643 | 0.717             | 0.559 | 0.554 | 0.594 |
|                 | C1    | 0.744  | 0.615 | 0.618 | 0.626 | 0.640 | 0.732             | 0.592 | 0.597 | 0.600 |
|                 | C2    | 0.720  | 0.570 | 0.563 | 0.605 | 0.619 | 0.713             | 0.554 | 0.548 | 0.589 |
|                 | C3    | 0.738  | 0.646 | 0.637 | 0.690 | 0.694 | 0.715             | 0.552 | 0.541 | 0.600 |
| pAUC<br>FPR 0.1 | Train | 0.626  | 0.554 | 0.544 | 0.564 | 0.561 | 0.614             | 0.531 | 0.528 | 0.536 |
|                 | Test  | 0.599  | 0.564 | 0.554 | 0.572 | 0.575 | 0.588             | 0.530 | 0.526 | 0.535 |
|                 | C1    | 0.610  | 0.552 | 0.545 | 0.563 | 0.561 | 0.599             | 0.529 | 0.528 | 0.536 |
|                 | C2    | 0.591  | 0.541 | 0.533 | 0.547 | 0.552 | 0.586             | 0.528 | 0.524 | 0.531 |
|                 | C3    | 0.610  | 0.619 | 0.602 | 0.625 | 0.619 | 0.588             | 0.536 | 0.529 | 0.543 |
| AP              | Train | 0.729  | 0.586 | 0.571 | 0.605 | 0.599 | 0.699             | 0.522 | 0.513 | 0.536 |
|                 | Test  | 0.756  | 0.664 | 0.651 | 0.689 | 0.688 | 0.722             | 0.581 | 0.572 | 0.605 |
|                 | C1    | 0.753  | 0.637 | 0.629 | 0.657 | 0.653 | 0.724             | 0.578 | 0.576 | 0.595 |
|                 | C2    | 0.723  | 0.601 | 0.584 | 0.627 | 0.630 | 0.706             | 0.563 | 0.553 | 0.584 |
|                 | C3    | 0.830  | 0.796 | 0.784 | 0.818 | 0.807 | 0.765             | 0.641 | 0.629 | 0.672 |

**Model Performance** – Functional Interaction model performance as measured by the mean across five-fold cross-validation. Phylogenetic profiling algorithms were compared on the basis of predicting gene-pair functional interaction (co-occurrence in a Reactome pathway). C1, C2, and C3 are stratifications for pairwise prediction for pairs of genes as in Supp. Table 3. Model evaluation is conducted with pairs of paralogs (Unfiltered) or without (Paralogs Filtered). MLPP - machine learning phylogenetic profiling (the method presented in this paper), NPP - normalized phylogenetic profiling, SVDp – SVD-Phy, PPP - PrePhyloPro, BPP - Hamming distance on binarized phylogenetic profiles, AUC - area under the ROC curve, pAUC - partial AUC at false positive rate (FPR) of 0.1. AP – average precision.

**Supplementary Table 5 - Parasitic Organisms**

| NCBI taxid | Taxonomical Name                        | Clade      | Ref. Clade |
|------------|-----------------------------------------|------------|------------|
| 241478     | <i>Soboliphyme baturini</i>             | Nematoda   | Metazoa    |
| 70415      | <i>Trichuris muris</i>                  | Nematoda   | Metazoa    |
| 36087      | <i>Trichuris trichiura</i>              | Nematoda   | Metazoa    |
| 68888      | <i>Trichuris suis</i>                   | Nematoda   | Metazoa    |
| 6336       | <i>Trichinella nelsoni</i>              | Nematoda   | Metazoa    |
| 45882      | <i>Trichinella britovi</i>              | Nematoda   | Metazoa    |
| 268475     | <i>Trichinella zimbabwensis</i>         | Nematoda   | Metazoa    |
| 268474     | <i>Trichinella papuae</i>               | Nematoda   | Metazoa    |
| 144512     | <i>Trichinella murrelli</i>             | Nematoda   | Metazoa    |
| 990121     | <i>Trichinella patagoniensis</i>        | Nematoda   | Metazoa    |
| 6335       | <i>Trichinella nativa</i>               | Nematoda   | Metazoa    |
| 6337       | <i>Trichinella pseudospiralis</i>       | Nematoda   | Metazoa    |
| 6334       | <i>Trichinella spiralis</i>             | Nematoda   | Metazoa    |
| 181606     | <i>Trichinella sp. T9</i>               | Nematoda   | Metazoa    |
| 334426     | <i>Angiostrongylus costaricensis</i>    | Nematoda   | Metazoa    |
| 6313       | <i>Angiostrongylus cantonensis</i>      | Nematoda   | Metazoa    |
| 27835      | <i>Nippostrongylus brasiliensis</i>     | Nematoda   | Metazoa    |
| 375939     | <i>Heligmosomoides polygyrus bakeri</i> | Nematoda   | Metazoa    |
| 29172      | <i>Dictyocaulus viviparus</i>           | Nematoda   | Metazoa    |
| 45464      | <i>Teladorsagia circumcincta</i>        | Nematoda   | Metazoa    |
| 6290       | <i>Haemonchus placei</i>                | Nematoda   | Metazoa    |
| 6289       | <i>Haemonchus contortus</i>             | Nematoda   | Metazoa    |
| 318479     | <i>Dracunculus medinensis</i>           | Nematoda   | Metazoa    |
| 451379     | <i>Syphacia muris</i>                   | Nematoda   | Metazoa    |
| 51028      | <i>Enterobius vermicularis</i>          | Nematoda   | Metazoa    |
| 6269       | <i>Anisakis simplex</i>                 | Nematoda   | Metazoa    |
| 6252       | <i>Ascaris lumbricoides</i>             | Nematoda   | Metazoa    |
| 6265       | <i>Toxocara canis</i>                   | Nematoda   | Metazoa    |
| 103827     | <i>Thelazia callipaeda</i>              | Nematoda   | Metazoa    |
| 637853     | <i>Gongylonema pulchrum</i>             | Nematoda   | Metazoa    |
| 6293       | <i>Wuchereria bancrofti</i>             | Nematoda   | Metazoa    |
| 7209       | <i>Loa loa</i>                          | Nematoda   | Metazoa    |
| 6279       | <i>Brugia malayi</i>                    | Nematoda   | Metazoa    |
| 42155      | <i>Brugia timori</i>                    | Nematoda   | Metazoa    |
| 6280       | <i>Brugia pahangi</i>                   | Nematoda   | Metazoa    |
| 6282       | <i>Onchocerca volvulus</i>              | Nematoda   | Metazoa    |
| 387005     | <i>Onchocerca flexuosa</i>              | Nematoda   | Metazoa    |
| 42157      | <i>Onchocerca ochengi</i>               | Nematoda   | Metazoa    |
| 6326       | <i>Bursaphelenchus xylophilus</i>       | Nematoda   | Metazoa    |
| 36090      | <i>Globodera pallida</i>                | Nematoda   | Metazoa    |
| 6305       | <i>Meloidogyne hapla</i>                | Nematoda   | Metazoa    |
| 37863      | <i>Steinernema glaseri</i>              | Nematoda   | Metazoa    |
| 131310     | <i>Parastrongyloides trichosuri</i>     | Nematoda   | Metazoa    |
| 75913      | <i>Strongyloides venezuelensis</i>      | Nematoda   | Metazoa    |
| 34506      | <i>Strongyloides ratti</i>              | Nematoda   | Metazoa    |
| 174720     | <i>Strongyloides papillosus</i>         | Nematoda   | Metazoa    |
| 61180      | <i>Oesophagostomum dentatum</i>         | Nematoda   | Metazoa    |
| 37862      | <i>Heterorhabditis bacteriophora</i>    | Nematoda   | Metazoa    |
| 51022      | <i>Ancylostoma duodenale</i>            | Nematoda   | Metazoa    |
| 53326      | <i>Ancylostoma ceylanicum</i>           | Nematoda   | Metazoa    |
| 51031      | <i>Necator americanus</i>               | Nematoda   | Metazoa    |
| 418985     | <i>Tropilaelaps mercedesae</i>          | Arthropoda |            |

|         |                                                    |                 |           |
|---------|----------------------------------------------------|-----------------|-----------|
| 6945    | <i>Ixodes scapularis</i>                           | Arthropoda      |           |
| 52283   | <i>Sarcoptes scabiei</i>                           | Arthropoda      |           |
| 121224  | <i>Pediculus humanus subsp. corporis</i>           | Arthropoda      |           |
| 7425    | <i>Nasonia vitripennis</i>                         | Arthropoda      |           |
| 70667   | <i>Schistocephalus solidus</i>                     | Platyhelminthes | Metazoa   |
| 53468   | <i>Mesocestoides corti</i>                         | Platyhelminthes | Metazoa   |
| 6216    | <i>Hymenolepis diminuta</i>                        | Platyhelminthes | Metazoa   |
| 102285  | <i>Hymenolepis nana</i>                            | Platyhelminthes | Metazoa   |
| 85433   | <i>Hymenolepis microstoma</i>                      | Platyhelminthes | Metazoa   |
| 60517   | <i>Taenia asiatica</i>                             | Platyhelminthes | Metazoa   |
| 6205    | <i>Hydatigena taeniaeformis</i>                    | Platyhelminthes | Metazoa   |
| 6211    | <i>Echinococcus multilocularis</i>                 | Platyhelminthes | Metazoa   |
| 6210    | <i>Echinococcus granulosus</i>                     | Platyhelminthes | Metazoa   |
| 6192    | <i>Fasciola hepatica</i>                           | Platyhelminthes | Metazoa   |
| 27848   | <i>Echinostoma caproni</i>                         | Platyhelminthes | Metazoa   |
| 6198    | <i>Opisthorchis viverrini</i>                      | Platyhelminthes | Metazoa   |
| 79923   | <i>Clonorchis sinensis</i>                         | Platyhelminthes | Metazoa   |
| 157069  | <i>Trichobilharzia regenti</i>                     | Platyhelminthes | Metazoa   |
| 6185    | <i>Schistosoma haematobium</i>                     | Platyhelminthes | Metazoa   |
| 48269   | <i>Schistosoma margrebowiei</i>                    | Platyhelminthes | Metazoa   |
| 6188    | <i>Schistosoma rodhaini</i>                        | Platyhelminthes | Metazoa   |
| 6183    | <i>Schistosoma mansoni</i>                         | Platyhelminthes | Metazoa   |
| 6186    | <i>Schistosoma curassoni</i>                       | Platyhelminthes | Metazoa   |
| 31246   | <i>Schistosoma mattheei</i>                        | Platyhelminthes | Metazoa   |
| 669202  | <i>Thelohanellus kitauei</i>                       | Other Metazoa   |           |
| 478820  | <i>Blastocystis sp. subtype 1</i>                  | Stramenopiles   | Eukaryota |
| 12968   | <i>Blastocystis hominis</i>                        | Stramenopiles   | Eukaryota |
| 65357   | <i>Albugo candida</i>                              | Stramenopiles   | Eukaryota |
| 114742  | <i>Pythium insidiosum</i>                          | Stramenopiles   | Eukaryota |
| 4781    | <i>Plasmopara halstedii</i>                        | Stramenopiles   | Eukaryota |
| 559515  | <i>Hyaloperonospora arabidopsidis</i>              | Stramenopiles   | Eukaryota |
| 29920   | <i>Phytophthora cactorum</i>                       | Stramenopiles   | Eukaryota |
| 403677  | <i>Phytophthora infestans (strain T30-4)</i>       | Stramenopiles   | Eukaryota |
| 4790    | <i>Phytophthora nicotianae</i>                     | Stramenopiles   | Eukaryota |
| 164328  | <i>Phytophthora ramorum</i>                        | Stramenopiles   | Eukaryota |
| 4795    | <i>Phytophthora megakarya</i>                      | Stramenopiles   | Eukaryota |
| 611791  | <i>Phytophthora palmivora var. palmivora</i>       | Stramenopiles   | Eukaryota |
| 1317063 | <i>Phytophthora parasitica CJ01A1</i>              | Stramenopiles   | Eukaryota |
| 423536  | <i>Perkinsus marinus</i>                           | Alveolata       | Eukaryota |
| 266149  | <i>Pseudocohnilembus persalinus</i>                | Alveolata       | Eukaryota |
| 110365  | <i>Gregarina niphandrodes</i>                      | Alveolata       | Eukaryota |
| 353152  | <i>Cryptosporidium parvum (strain Iowa II)</i>     | Alveolata       | Eukaryota |
| 857276  | <i>Cryptosporidium ubiquitum</i>                   | Alveolata       | Eukaryota |
| 441375  | <i>Cryptosporidium muris (strain RN66)</i>         | Alveolata       | Eukaryota |
| 483139  | <i>Cystoisospora suis</i>                          | Alveolata       | Eukaryota |
| 94643   | <i>Besnoitia besnoiti</i>                          | Alveolata       | Eukaryota |
| 99158   | <i>Hammondia hammondi</i>                          | Alveolata       | Eukaryota |
| 432359  | <i>Toxoplasma gondii (strain ATCC 50861 / VEG)</i> | Alveolata       | Eukaryota |
| 572307  | <i>Neospora caninum (strain Liverpool)</i>         | Alveolata       | Eukaryota |
| 88456   | <i>Cyclospora cayetanensis</i>                     | Alveolata       | Eukaryota |
| 51316   | <i>Eimeria praecox</i>                             | Alveolata       | Eukaryota |
| 5802    | <i>Eimeria tenella</i>                             | Alveolata       | Eukaryota |
| 5801    | <i>Eimeria acervulina</i>                          | Alveolata       | Eukaryota |
| 44415   | <i>Eimeria mitis</i>                               | Alveolata       | Eukaryota |
| 51314   | <i>Eimeria brunetti</i>                            | Alveolata       | Eukaryota |

|         |                                                   |                |           |
|---------|---------------------------------------------------|----------------|-----------|
| 5804    | <i>Eimeria maxima</i>                             | Alveolata      | Eukaryota |
| 51315   | <i>Eimeria necatrix</i>                           | Alveolata      | Eukaryota |
| 1537102 | <i>Theileria equi strain WA</i>                   | Alveolata      | Eukaryota |
| 869250  | <i>Theileria orientalis strain Shintoku</i>       | Alveolata      | Eukaryota |
| 5875    | <i>Theileria parva</i>                            | Alveolata      | Eukaryota |
| 5874    | <i>Theileria annulata</i>                         | Alveolata      | Eukaryota |
| 5865    | <i>Babesia bovis</i>                              | Alveolata      | Eukaryota |
| 462227  | <i>Babesia sp. Xinjiang</i>                       | Alveolata      | Eukaryota |
| 1133968 | <i>Babesia microti (strain RI)</i>                | Alveolata      | Eukaryota |
| 5866    | <i>Babesia bigemina</i>                           | Alveolata      | Eukaryota |
| 189622  | <i>Babesia ovata</i>                              | Alveolata      | Eukaryota |
| 208452  | <i>Plasmodium coatneyi</i>                        | Alveolata      | Eukaryota |
| 85471   | <i>Plasmodium relictum</i>                        | Alveolata      | Eukaryota |
| 1036723 | <i>Plasmodium falciparum Vietnam Oak-Knoll</i>    | Alveolata      | Eukaryota |
| 647221  | <i>Plasmodium gaboni</i>                          | Alveolata      | Eukaryota |
| 5821    | <i>Plasmodium berghei</i>                         | Alveolata      | Eukaryota |
| 31271   | <i>Plasmodium chabaudi chabaudi</i>               | Alveolata      | Eukaryota |
| 73239   | <i>Plasmodium yoelii yoelii</i>                   | Alveolata      | Eukaryota |
| 5851    | <i>Plasmodium knowlesi (strain H)</i>             | Alveolata      | Eukaryota |
| 5858    | <i>Plasmodium malariae</i>                        | Alveolata      | Eukaryota |
| 77519   | <i>Plasmodium gonderi</i>                         | Alveolata      | Eukaryota |
| 126793  | <i>Plasmodium vivax (strain Salvador I)</i>       | Alveolata      | Eukaryota |
| 1120755 | <i>Plasmodium cynomolgi strain B</i>              | Alveolata      | Eukaryota |
| 864141  | <i>Plasmodium ovale curtisi</i>                   | Alveolata      | Eukaryota |
| 1237626 | <i>Plasmodium inui San Antonio 1</i>              | Alveolata      | Eukaryota |
| 5857    | <i>Plasmodium fragile</i>                         | Alveolata      | Eukaryota |
| 1291522 | <i>Helicosporidium sp. ATCC 50920</i>             | Viridiplantae  |           |
| 948595  | <i>Vavraia culicis (isolate floridensis)</i>      | Microsporidia  | Fungi     |
| 1240240 | <i>Anncalia algerae PRA109</i>                    | Microsporidia  | Fungi     |
| 1485682 | <i>Mitosporidium daphniae</i>                     | Microsporidia  | Fungi     |
| 1003232 | <i>Edhazardia aedis (strain USNM 41457)</i>       | Microsporidia  | Fungi     |
| 1081669 | <i>Hepatospora eriocheir</i>                      | Microsporidia  | Fungi     |
| 40302   | <i>Nosema ceranae</i>                             | Microsporidia  | Fungi     |
| 578461  | <i>Nosema bombycis (strain CQ1 / CVCC 102059)</i> | Microsporidia  | Fungi     |
| 907965  | <i>Encephalitozoon hellem (strain ATCC 50504)</i> | Microsporidia  | Fungi     |
| 284813  | <i>Encephalitozoon cuniculi (strain GB-M1)</i>    | Microsporidia  | Fungi     |
| 1178016 | <i>Encephalitozoon romaleae</i>                   | Microsporidia  | Fungi     |
| 876142  | <i>Encephalitozoon intestinalis</i>               | Microsporidia  | Fungi     |
| 1408658 | <i>Pneumocystis carinii (strain B80)</i>          | Ascomycota     |           |
| 1069680 | <i>Pneumocystis murina (strain B123)</i>          | Ascomycota     |           |
| 1408657 | <i>Pneumocystis jirovecii (strain RU7)</i>        | Ascomycota     |           |
| 59799   | <i>Angomonas deanei</i>                           | Kinetoplastida | Eukaryota |
| 28005   | <i>Strigomonas culicis</i>                        | Kinetoplastida | Eukaryota |
| 134006  | <i>Phytomonas sp. isolate EM1</i>                 | Kinetoplastida | Eukaryota |
| 157538  | <i>Leptomonas pyrrocoris</i>                      | Kinetoplastida | Eukaryota |
| 5684    | <i>Leptomonas seymouri</i>                        | Kinetoplastida | Eukaryota |
| 5660    | <i>Leishmania braziliensis</i>                    | Kinetoplastida | Eukaryota |
| 929439  | <i>Leishmania mexicana</i>                        | Kinetoplastida | Eukaryota |
| 5664    | <i>Leishmania major</i>                           | Kinetoplastida | Eukaryota |
| 5671    | <i>Leishmania infantum</i>                        | Kinetoplastida | Eukaryota |
| 429131  | <i>Trypanosoma rangeli SC58</i>                   | Kinetoplastida | Eukaryota |
| 67003   | <i>Trypanosoma theileri</i>                       | Kinetoplastida | Eukaryota |
| 1416333 | <i>Trypanosoma cruzi Dm28c</i>                    | Kinetoplastida | Eukaryota |
| 1055687 | <i>Trypanosoma vivax (strain Y486)</i>            | Kinetoplastida | Eukaryota |
| 185431  | <i>Trypanosoma brucei brucei</i>                  | Kinetoplastida | Eukaryota |

|         |                                               |                  |           |
|---------|-----------------------------------------------|------------------|-----------|
| 1068625 | <i>Trypanosoma congolense</i> (strain IL3000) | Kinetoplastida   | Eukaryota |
| 5722    | <i>Trichomonas vaginalis</i>                  | Other Eukaryotes |           |
| 1144522 | <i>Tritrichomonas foetus</i>                  | Other Eukaryotes |           |
| 348837  | <i>Spironucleus salmonicida</i>               | Other Eukaryotes |           |
| 184922  | <i>Giardia intestinalis</i>                   | Other Eukaryotes |           |
| 598745  | <i>Giardia intestinalis</i>                   | Other Eukaryotes |           |
| 370354  | <i>Entamoeba dispar</i>                       | Amoebozoa        |           |
| 370355  | <i>Entamoeba invadens</i> IP1                 | Amoebozoa        |           |
| 5759    | <i>Entamoeba histolytica</i>                  | Amoebozoa        |           |

**Parasitic organisms** - List of all parasitic organisms included in the analysis. Designation as parasitic was decided by manual curation based on several databases (see Methods). Clade denotes the clade displayed in Figure 7 and are arbitrarily chosen from the lineage of the organism for visualization purposes. The reference clade is a parent clade used for comparison of percent conservation (Figure 7b,c, see Methods).

**Supplementary Table 6 – Model Performance Excluding Parasites**

| Paralogs    | Metric        | Split | BPP         |           |              |     | NPP         |           |              |     | MLPP        |           |              |     |                     |     |
|-------------|---------------|-------|-------------|-----------|--------------|-----|-------------|-----------|--------------|-----|-------------|-----------|--------------|-----|---------------------|-----|
|             |               |       | All species |           | No parasites |     | All species |           | No parasites |     | All species |           | No parasites |     | No parasitic clades |     |
|             |               |       | mean        | std       | mean         | std | mean        | std       | mean         | std | mean        | std       | mean         | std | mean                | std |
| Unfilt.     | AUC           | train | 0.64±0.00   | 0.64±0.00 |              |     | 0.61±0.01   | 0.60±0.01 |              |     | 0.74±0.01   | 0.73±0.01 | 0.73±0.01    |     |                     |     |
|             |               | test  | 0.64±0.00   | 0.64±0.00 |              |     | 0.60±0.00   | 0.59±0.00 |              |     | 0.72±0.00   | 0.72±0.00 | 0.71±0.00    |     |                     |     |
|             |               | C1    | 0.64±0.01   | 0.64±0.01 |              |     | 0.61±0.01   | 0.60±0.01 |              |     | 0.73±0.01   | 0.73±0.01 | 0.72±0.01    |     |                     |     |
|             |               | C2    | 0.62±0.00   | 0.62±0.00 |              |     | 0.57±0.00   | 0.57±0.00 |              |     | 0.71±0.00   | 0.71±0.00 | 0.70±0.00    |     |                     |     |
|             |               | C3    | 0.69±0.01   | 0.69±0.01 |              |     | 0.65±0.01   | 0.65±0.01 |              |     | 0.73±0.01   | 0.72±0.01 | 0.72±0.01    |     |                     |     |
|             | pAUC (FPR0.1) | train | 0.56±0.00   | 0.56±0.00 |              |     | 0.55±0.00   | 0.55±0.00 |              |     | 0.61±0.00   | 0.61±0.00 | 0.59±0.00    |     |                     |     |
|             |               | test  | 0.58±0.00   | 0.57±0.00 |              |     | 0.57±0.00   | 0.56±0.00 |              |     | 0.60±0.00   | 0.59±0.00 | 0.58±0.00    |     |                     |     |
|             |               | C1    | 0.56±0.01   | 0.56±0.01 |              |     | 0.55±0.00   | 0.55±0.00 |              |     | 0.60±0.01   | 0.60±0.01 | 0.59±0.01    |     |                     |     |
|             |               | C2    | 0.56±0.00   | 0.55±0.00 |              |     | 0.54±0.00   | 0.54±0.00 |              |     | 0.59±0.00   | 0.59±0.00 | 0.58±0.00    |     |                     |     |
|             |               | C3    | 0.62±0.01   | 0.61±0.01 |              |     | 0.62±0.00   | 0.62±0.00 |              |     | 0.61±0.02   | 0.61±0.02 | 0.59±0.01    |     |                     |     |
|             | AP            | train | 0.46±0.01   | 0.45±0.01 |              |     | 0.44±0.01   | 0.44±0.01 |              |     | 0.58±0.01   | 0.58±0.01 | 0.56±0.01    |     |                     |     |
|             |               | test  | 0.53±0.01   | 0.52±0.01 |              |     | 0.51±0.00   | 0.50±0.00 |              |     | 0.60±0.01   | 0.60±0.01 | 0.58±0.01    |     |                     |     |
|             |               | C1    | 0.49±0.01   | 0.49±0.01 |              |     | 0.47±0.01   | 0.47±0.01 |              |     | 0.60±0.01   | 0.60±0.01 | 0.58±0.01    |     |                     |     |
|             |               | C2    | 0.47±0.01   | 0.46±0.01 |              |     | 0.44±0.00   | 0.44±0.00 |              |     | 0.57±0.01   | 0.56±0.01 | 0.54±0.01    |     |                     |     |
|             |               | C3    | 0.67±0.02   | 0.65±0.02 |              |     | 0.67±0.01   | 0.66±0.01 |              |     | 0.69±0.02   | 0.68±0.02 | 0.67±0.02    |     |                     |     |
| Para. Filt. | AUC           | train | 0.62±0.00   | 0.62±0.00 |              |     | 0.59±0.00   | 0.58±0.00 |              |     | 0.73±0.01   | 0.73±0.01 | 0.72±0.01    |     |                     |     |
|             |               | test  | 0.61±0.00   | 0.61±0.00 |              |     | 0.56±0.00   | 0.56±0.00 |              |     | 0.71±0.00   | 0.71±0.00 | 0.70±0.00    |     |                     |     |
|             |               | C1    | 0.62±0.01   | 0.62±0.01 |              |     | 0.59±0.01   | 0.58±0.01 |              |     | 0.72±0.01   | 0.72±0.01 | 0.71±0.01    |     |                     |     |
|             |               | C2    | 0.61±0.00   | 0.61±0.00 |              |     | 0.56±0.00   | 0.55±0.00 |              |     | 0.71±0.00   | 0.70±0.00 | 0.70±0.00    |     |                     |     |
|             |               | C3    | 0.61±0.01   | 0.61±0.01 |              |     | 0.56±0.01   | 0.55±0.01 |              |     | 0.71±0.01   | 0.70±0.01 | 0.69±0.01    |     |                     |     |
|             | pAUC (FPR0.1) | train | 0.55±0.00   | 0.55±0.00 |              |     | 0.53±0.00   | 0.53±0.00 |              |     | 0.60±0.01   | 0.60±0.01 | 0.59±0.00    |     |                     |     |
|             |               | test  | 0.55±0.00   | 0.55±0.00 |              |     | 0.53±0.00   | 0.53±0.00 |              |     | 0.59±0.00   | 0.58±0.00 | 0.57±0.00    |     |                     |     |
|             |               | C1    | 0.54±0.01   | 0.55±0.01 |              |     | 0.53±0.00   | 0.53±0.00 |              |     | 0.59±0.01   | 0.59±0.01 | 0.58±0.01    |     |                     |     |
|             |               | C2    | 0.55±0.00   | 0.55±0.00 |              |     | 0.53±0.00   | 0.53±0.00 |              |     | 0.58±0.00   | 0.58±0.00 | 0.57±0.00    |     |                     |     |
|             |               | C3    | 0.56±0.01   | 0.56±0.01 |              |     | 0.54±0.00   | 0.54±0.00 |              |     | 0.59±0.02   | 0.59±0.01 | 0.57±0.01    |     |                     |     |
|             | AP            | train | 0.41±0.01   | 0.41±0.01 |              |     | 0.38±0.01   | 0.38±0.01 |              |     | 0.56±0.01   | 0.55±0.01 | 0.53±0.01    |     |                     |     |
|             |               | test  | 0.45±0.01   | 0.45±0.01 |              |     | 0.41±0.00   | 0.41±0.00 |              |     | 0.56±0.01   | 0.56±0.01 | 0.54±0.01    |     |                     |     |
|             |               | C1    | 0.44±0.01   | 0.44±0.01 |              |     | 0.41±0.01   | 0.41±0.01 |              |     | 0.57±0.01   | 0.57±0.01 | 0.55±0.01    |     |                     |     |
|             |               | C2    | 0.44±0.00   | 0.43±0.00 |              |     | 0.39±0.00   | 0.39±0.00 |              |     | 0.55±0.01   | 0.54±0.01 | 0.52±0.01    |     |                     |     |
|             |               | C3    | 0.50±0.03   | 0.50±0.03 |              |     | 0.45±0.01   | 0.46±0.01 |              |     | 0.60±0.03   | 0.59±0.03 | 0.57±0.03    |     |                     |     |

Performance of functional interaction model when parasites are excluded. The functional interaction model (MLPP) is compared with two other phylogenetic profiling approaches (BPP, NPP). The approaches are compared on three levels, having all species, excluding only parasitic species (“No parasites”) and excluding all clades that contain parasitic species (“No parasitic clades”). The approaches are compared for three metrics – AUC, pROC AUC (pAUC) at FPR of 0.1 and AP, and on five stratifications (see Methods). Values are shown as the mean over cross-validation folds ± standard deviation. MLPP - machine learning phylogenetic profiling (the method presented in this paper), NPP - normalized phylogenetic profiling, BPP - Hamming distance on binarized phylogenetic profiles.



Supplementary Figure 1 - Clademap

A

All Clades

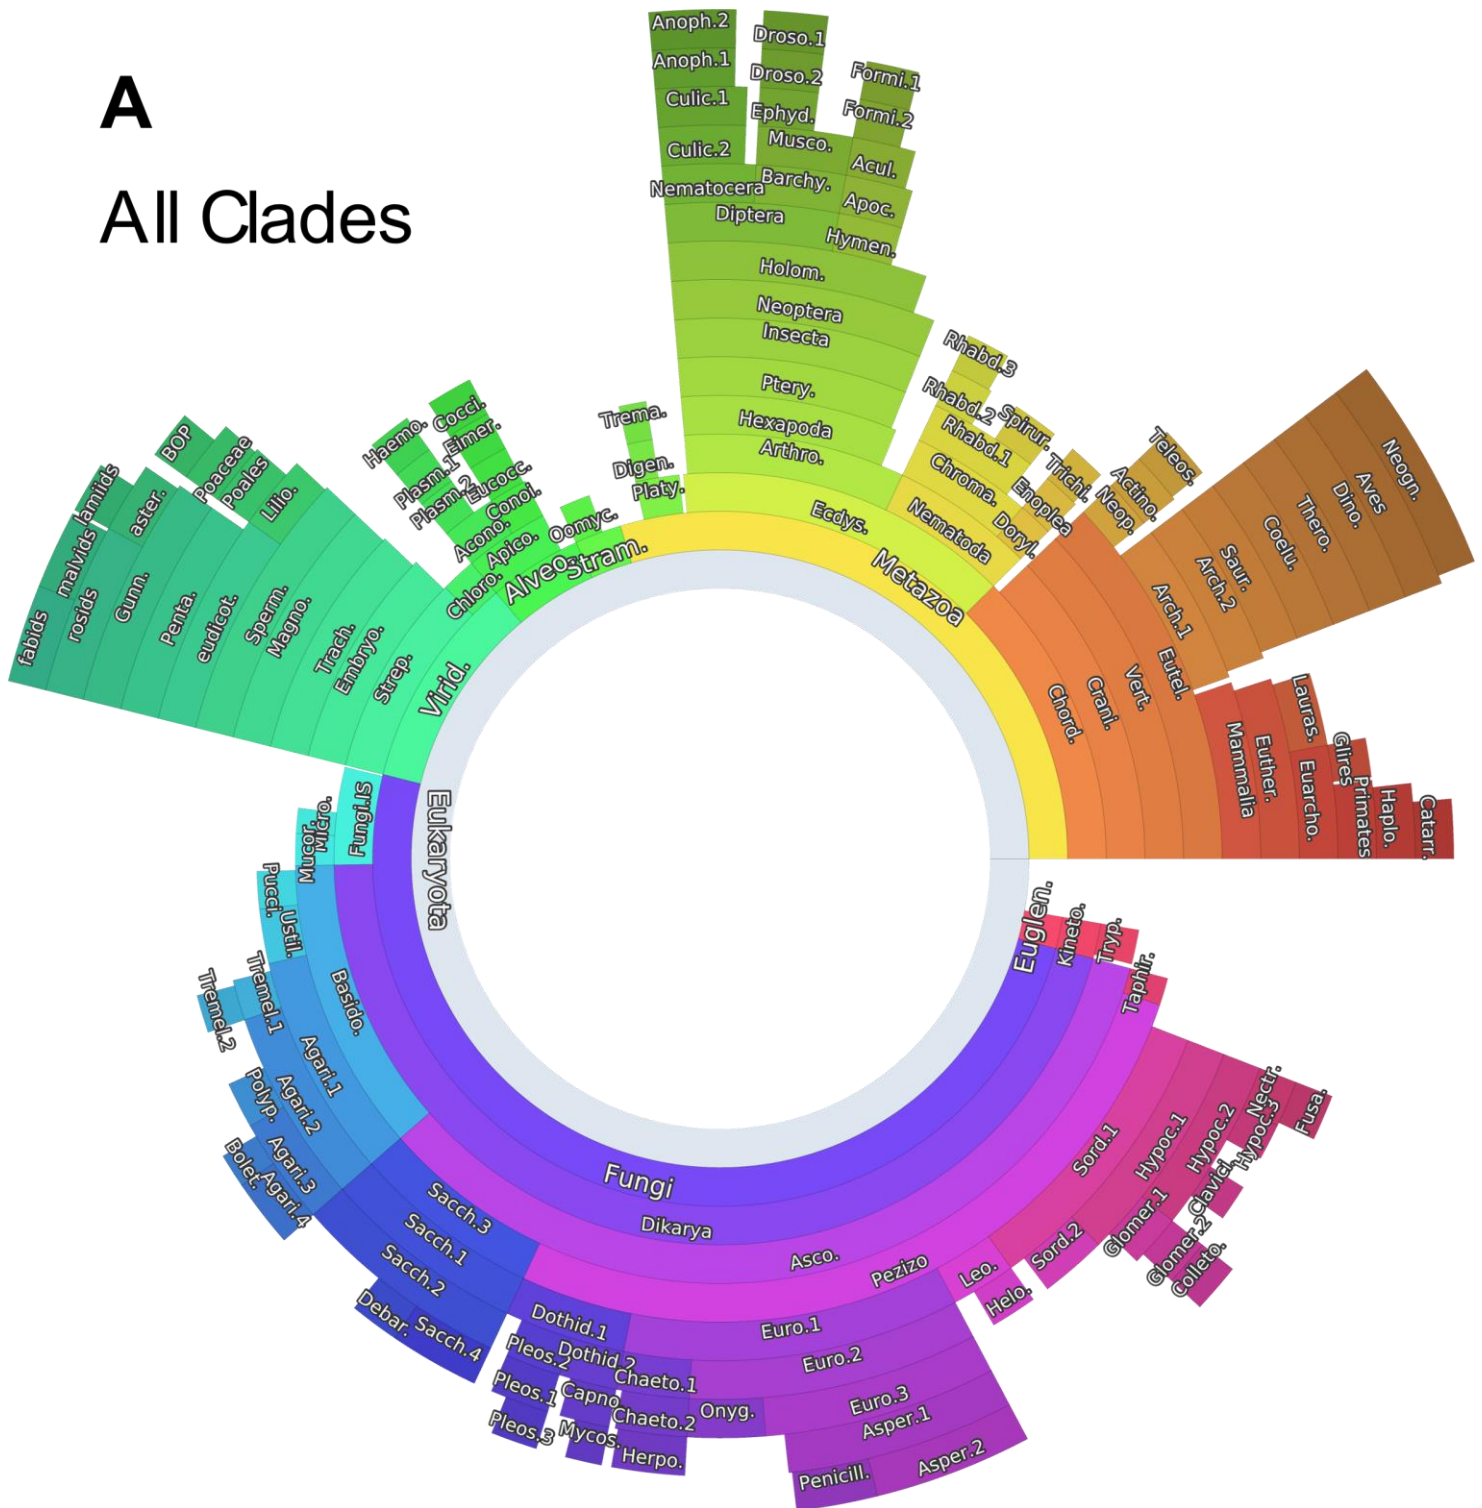

# B

## Non-Redundant Clades

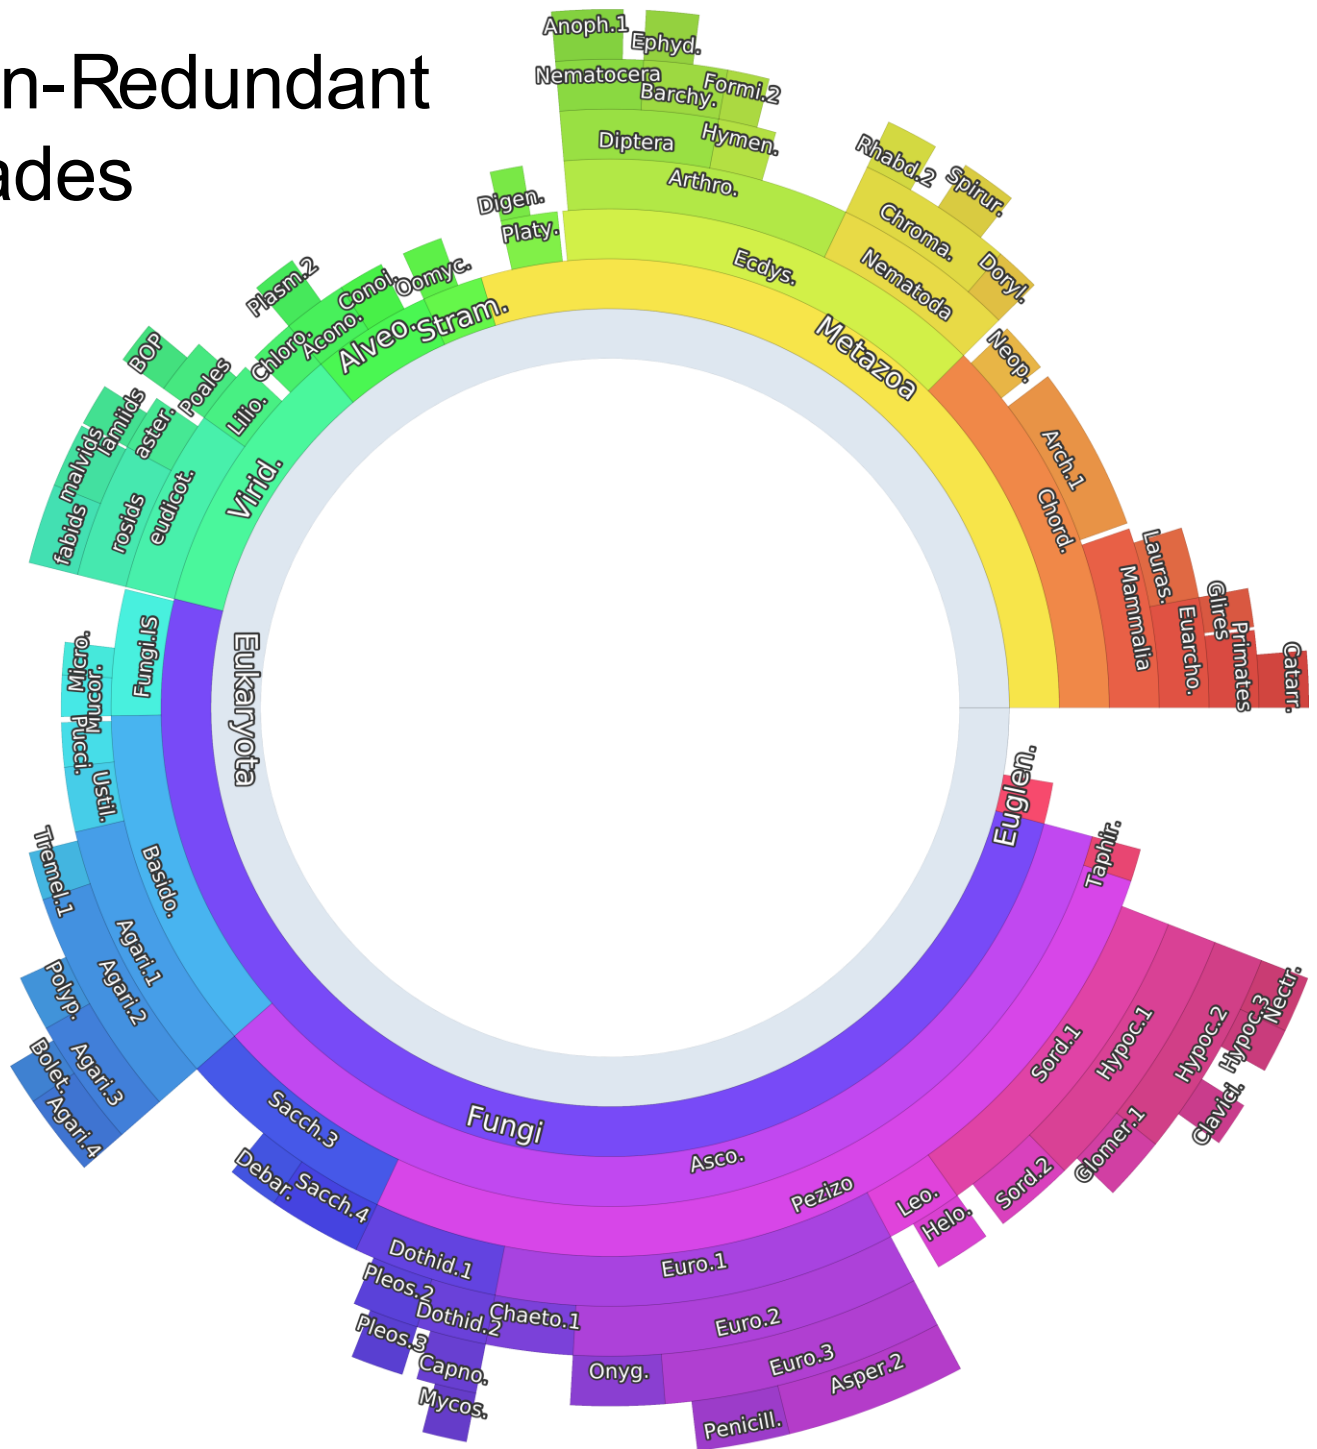

**Clademap** – Clades are shown hierarchically and sorted by distance from human starting from the 0-degree position (middle right) and colored accordingly by the middle of the clade. Each species can belong to multiple clades, which are sorted by the size of the clade from the inside outward. (A) All clades with more than 10 species. (B) Clades were filtered to remove redundancy.

Supplementary Figure 2 – Positive-Unlabeled Learning

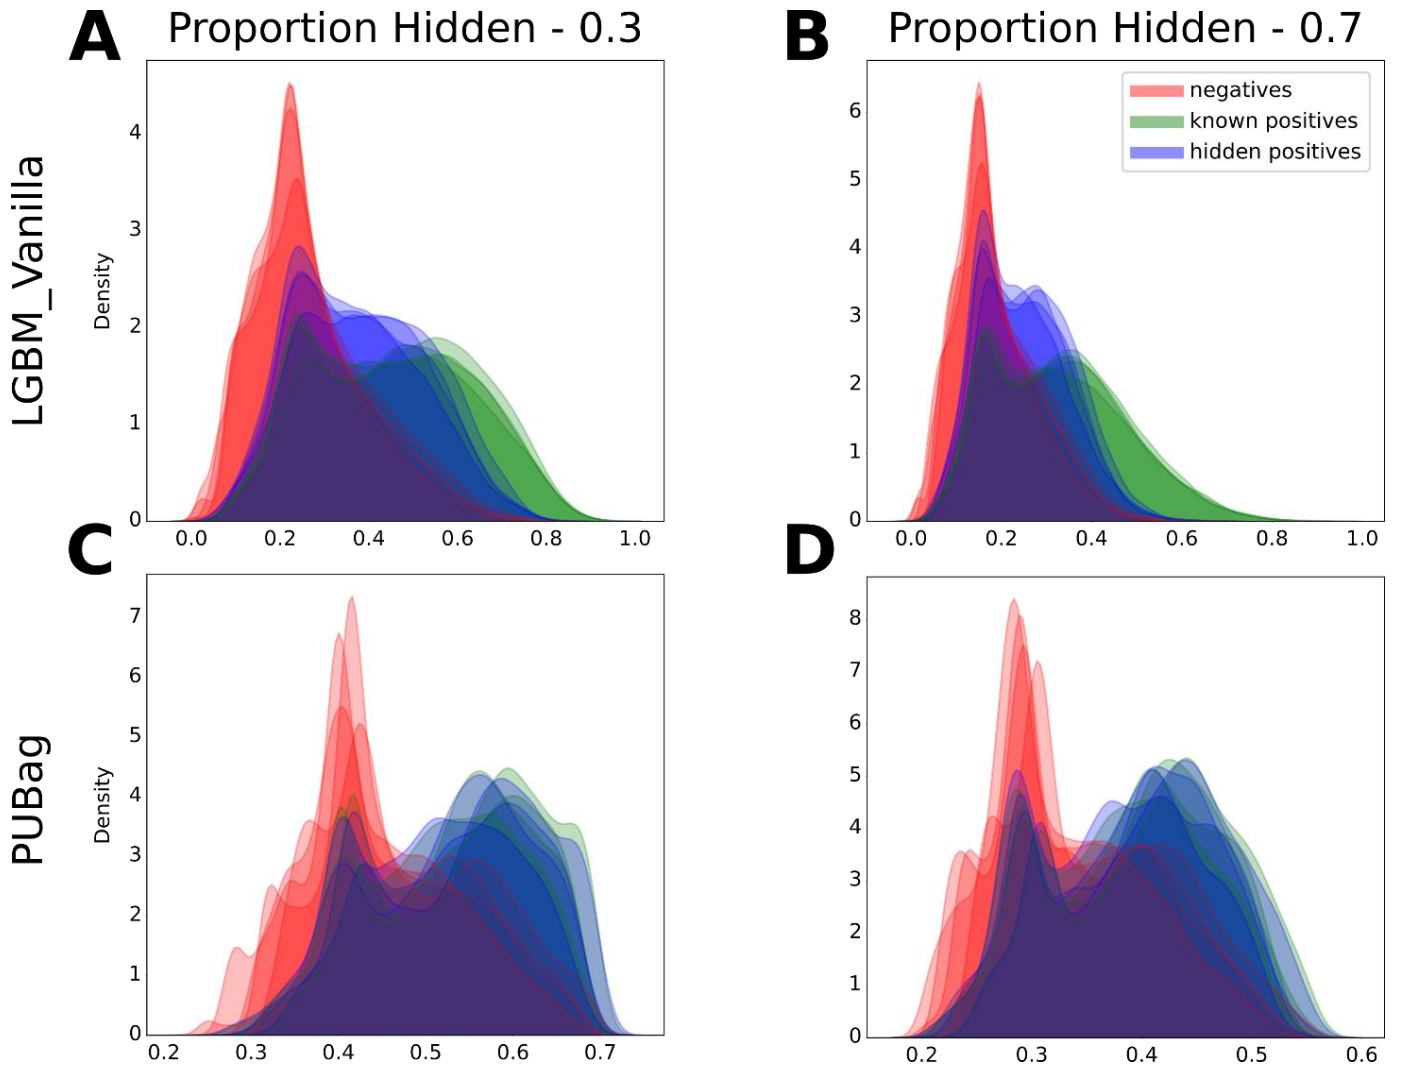

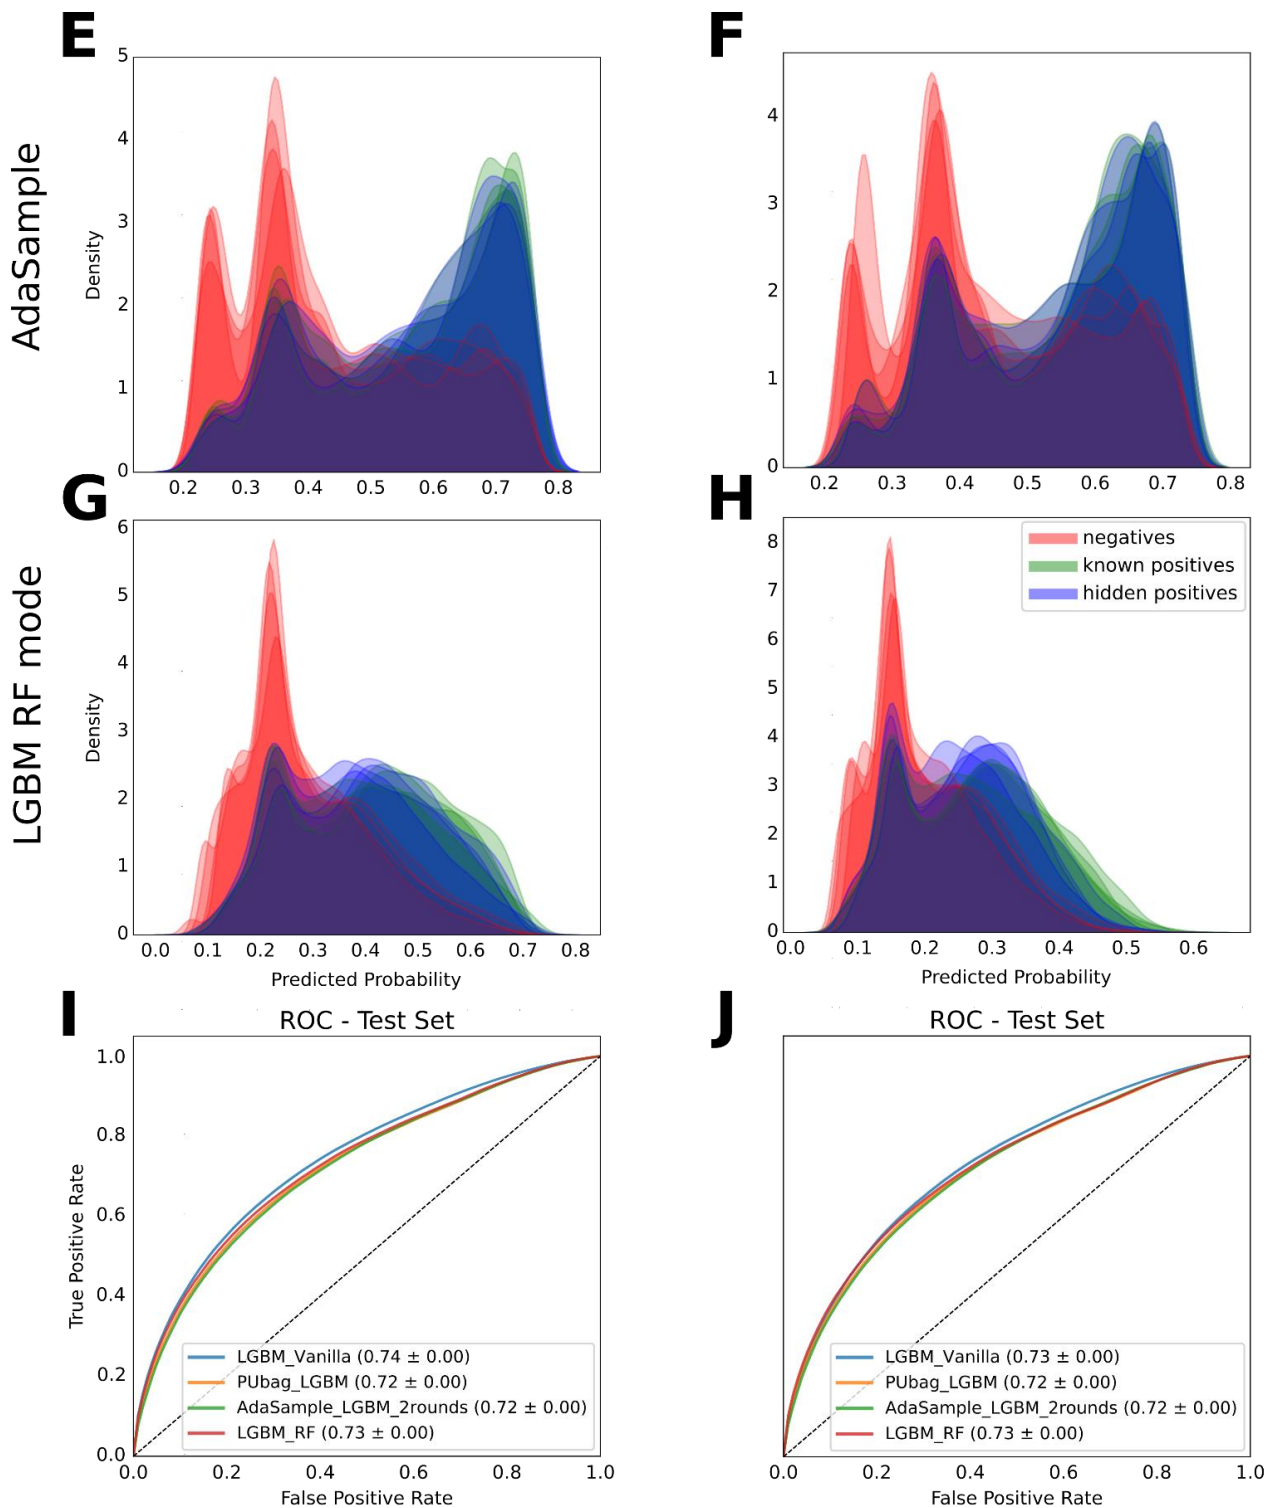

**Positive-Unlabeled Learning** – (A-H) The probability distributions for gene-pairs belonging to the random negative pairs (red), known positives (green) and hidden positives (blue) are shown for each of the four models tested – LGBM\_Vanilla (A,B), PUBag (C,D), AdaSample (E, F) and LGBM RF (G,H) for two probabilities of hiding positives: 0.3 (A,C,E,G) and 0.7 (B,D,F,H). (I-J) ROC curves describing the performance of the different models, trained with 0.3 of the positives hidden (I) or 0.7 (J). Positives are only hidden in the training set (see Supp. Methods). Numbers in brackets are the AUC and the standard deviation of the AUC across cross-validation. LGBM – light gbm, PUBag – positive unlabeled bagging classifier, AdaSample – Adaptive Sampling, RF – random forest, ROC – receiver operator characteristics, AUC – area under the curve. Source data are provided as a Source Data file.

### Supplementary Figure 3 - Comparing Machine Learning Algorithms

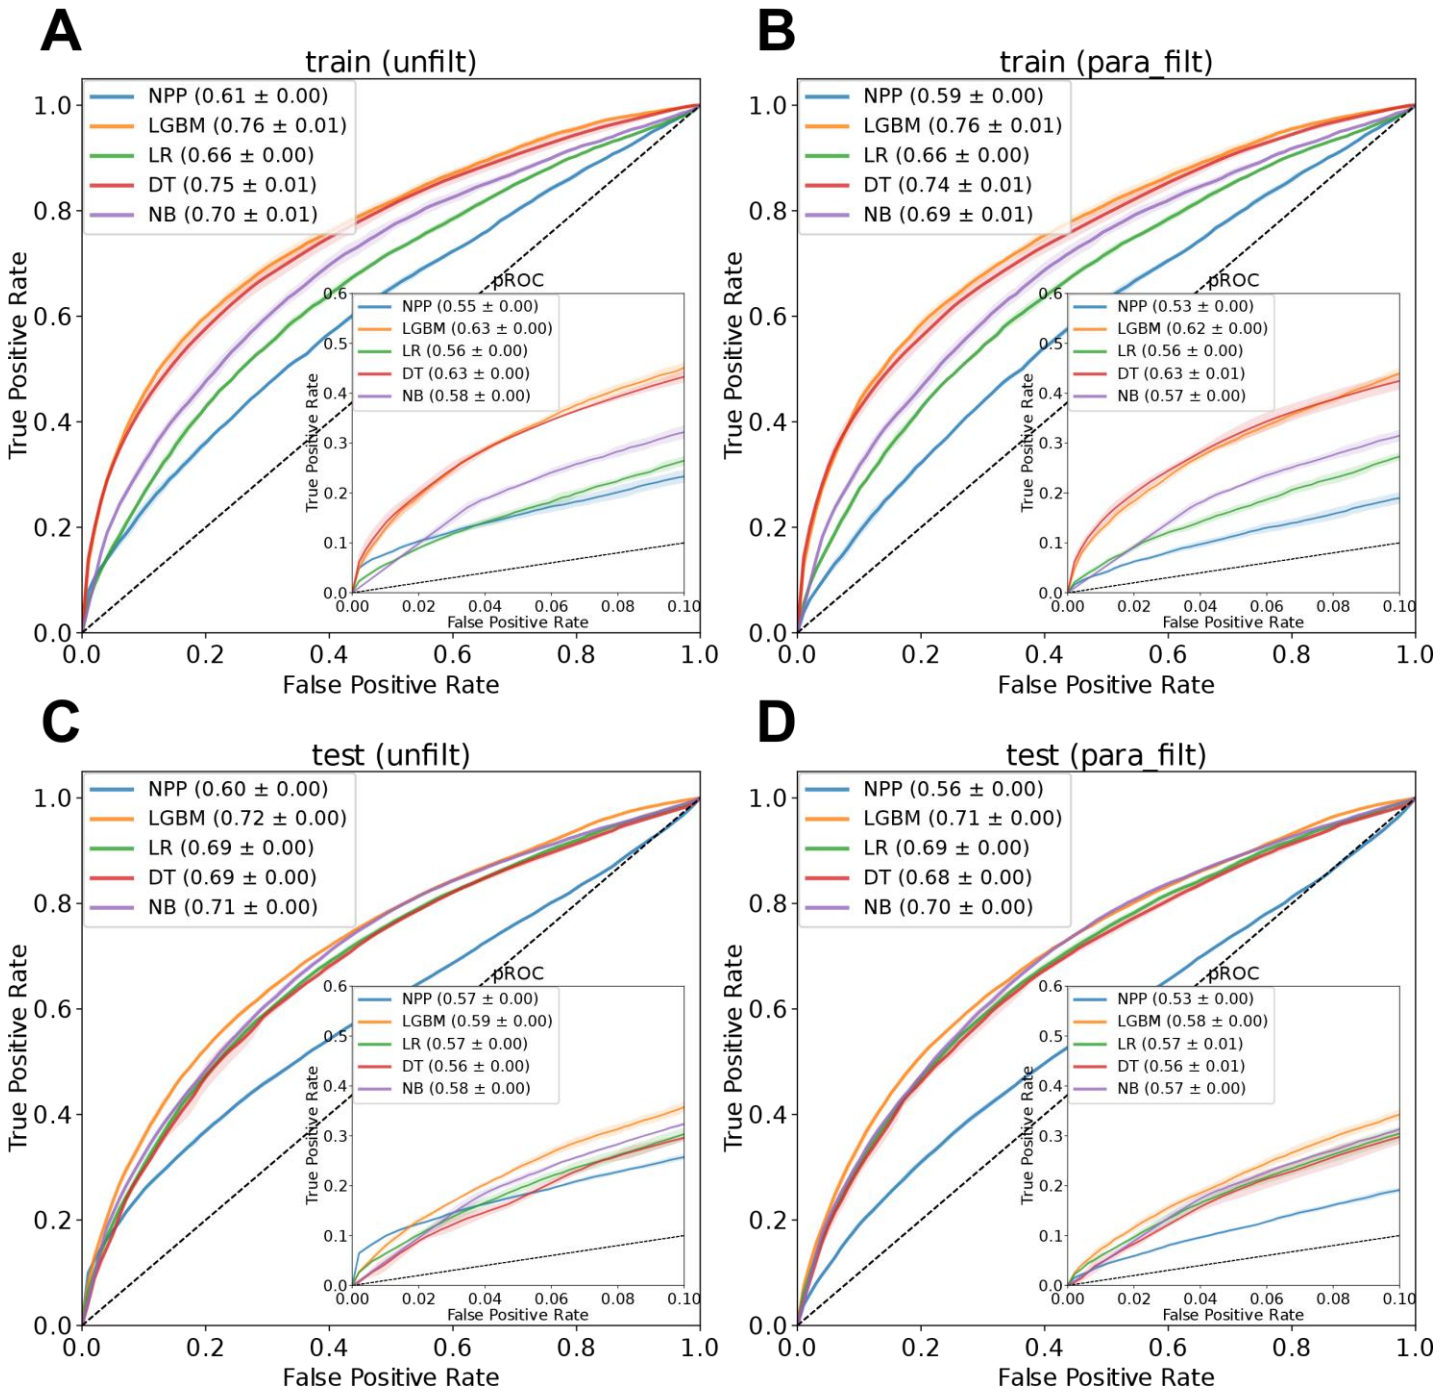

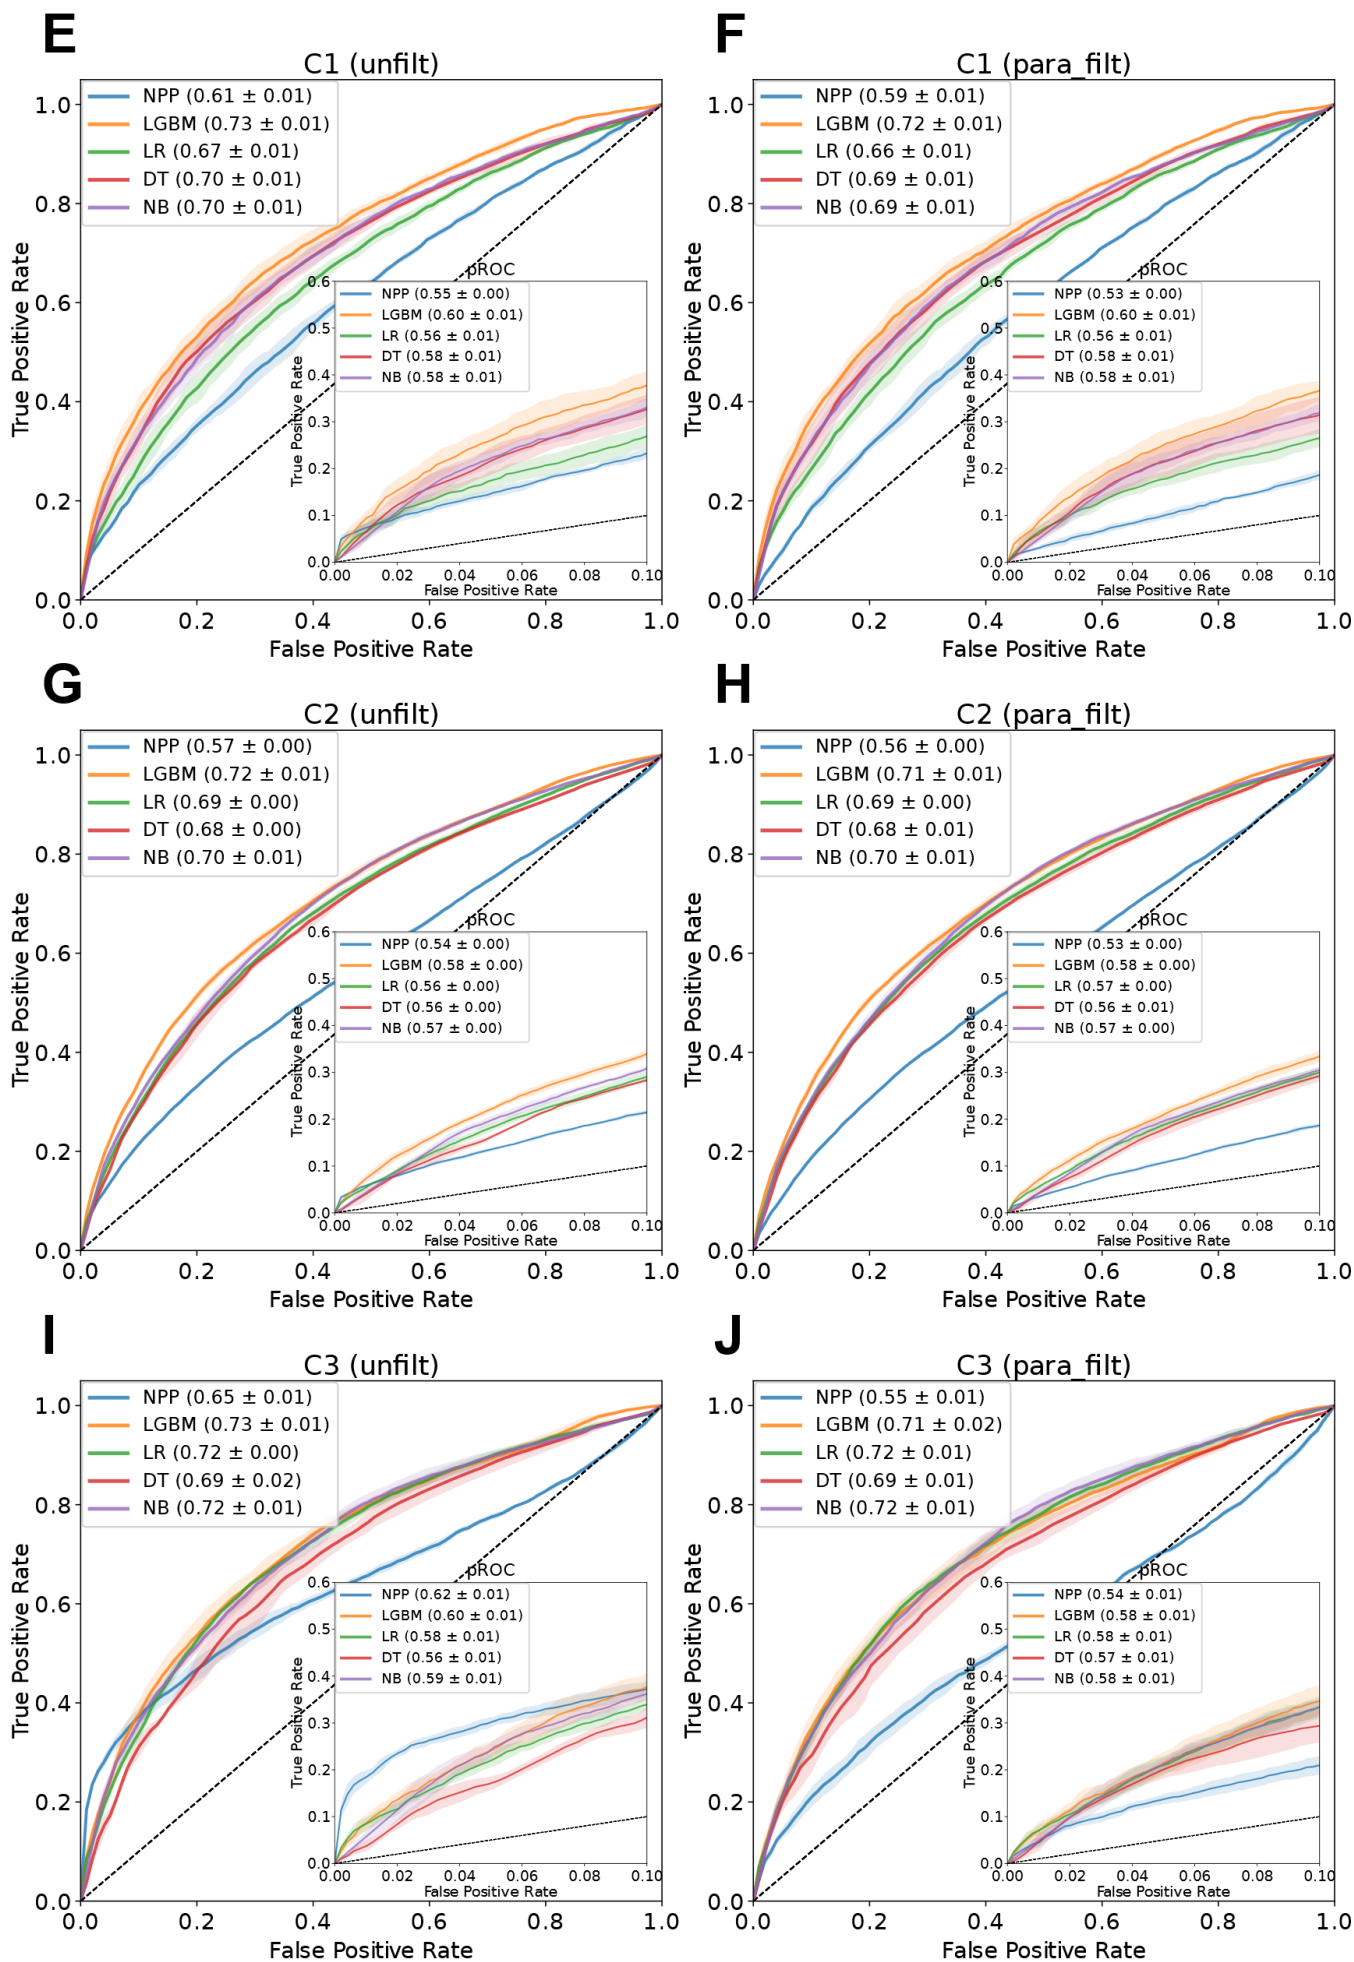

**Model Performance (Functional Interaction Model) – Comparing Machine Learning Algorithms.** (A-J) ML algorithms were compared on the basis of predicting gene pair functional interaction (co-occurrence in Reactome pathway). Performance was measured using a ROC curve and the AUC. In the inset of each panel is a pROC curve for the FPR range (0-0.1). LGBM was chosen based on superior performance. C1 (E-F), C2 (G-H), and C3 (I-J) are stratifications for pairwise prediction for pairs of genes appearing both in the training set, one appearing in the training set, and not appearing in the training set, respectively (see Methods, based on <sup>1</sup>). Model evaluation was conducted with pairs of paralogs (A, C, E, G, I) or without (B, D, F, H, J). Numbers in brackets are the AUC and the standard deviation of the AUC in cross-validations. NPP - normalized phylogenetic profiling, LGBM - light gradient boosting machine (lightGBM) in random forest mode, LR - logistic regression, DT - decision tree, NB - naive bayes, ROC - receiver operator characteristics, AUC - area under the curve, pROC - partial ROC curve, FPR - false positive rate. Source data are provided as a Source Data file.

## Supplementary Figure 4 – “Young” Genes

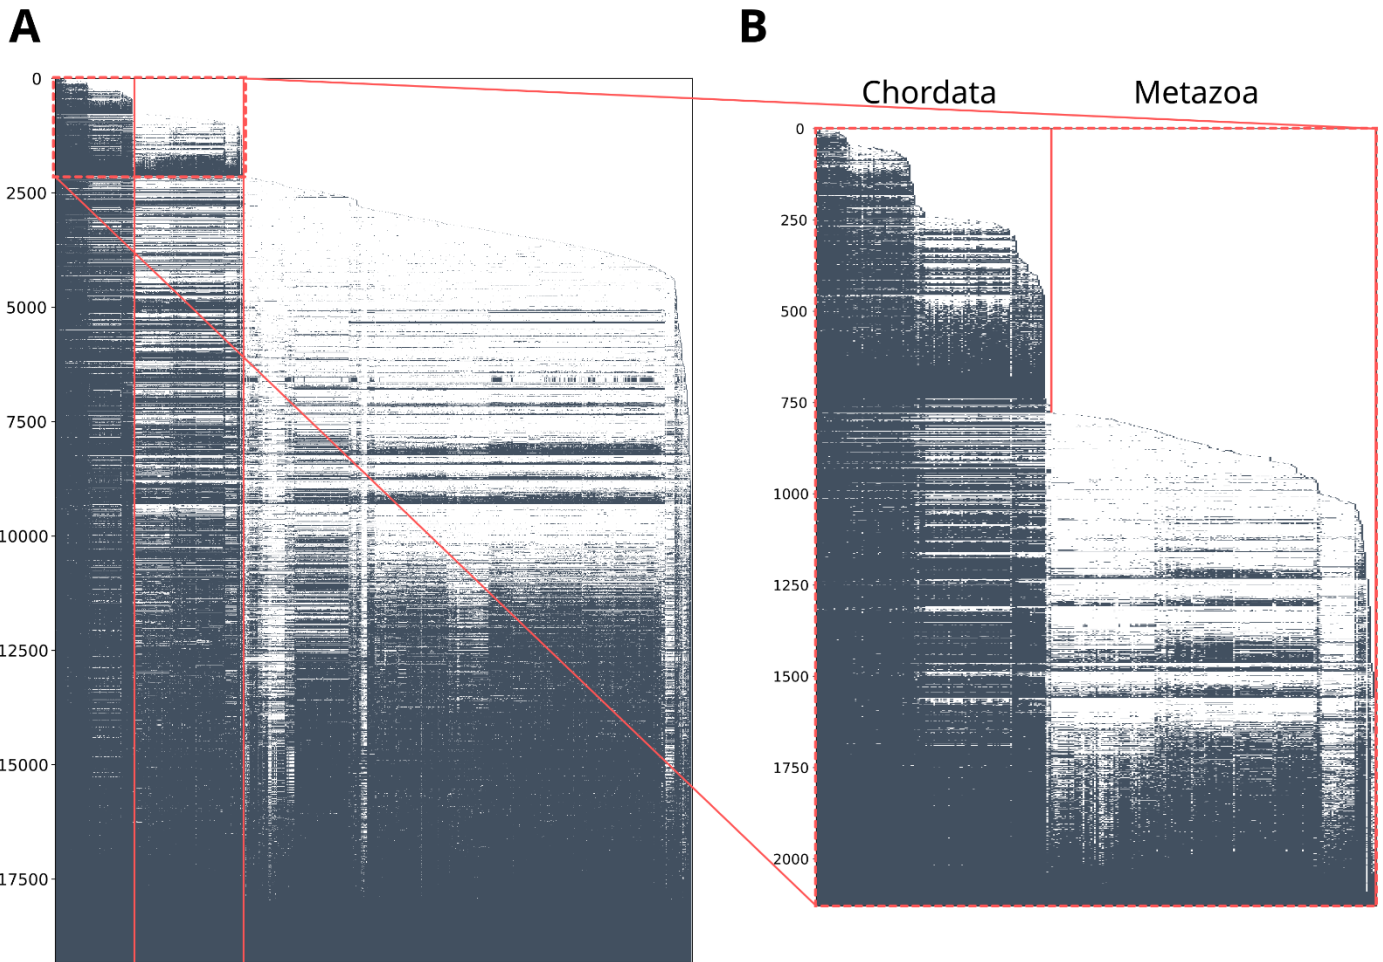

**C**

|         |         | ROC AUC                 |                       |                        | pROC AUC                |                       |                        | AP                      |                       |                        |
|---------|---------|-------------------------|-----------------------|------------------------|-------------------------|-----------------------|------------------------|-------------------------|-----------------------|------------------------|
|         |         | All genes - 1.7e5 pairs | Metazoa - 2.4e3 pairs | Chordata - 4.5e2 pairs | All genes - 1.7e5 pairs | Metazoa - 2.4e3 pairs | Chordata - 4.5e2 pairs | All genes - 1.7e5 pairs | Metazoa - 2.4e3 pairs | Chordata - 4.5e2 pairs |
| Unfilt. | MLPP    | 0.73 ±0.00              | 0.69 ±0.02            | 0.70 ±0.04             | 0.60 ±0.00              | 0.58 ±0.01            | 0.54 ±0.02             | 0.76 ±0.00              | 0.76 ±0.03            | 0.88 ±0.03             |
|         | NPP     | 0.60 ±0.00              | 0.75 ±0.00            | 0.77 ±0.03             | 0.56 ±0.00              | 0.67 ±0.01            | 0.65 ±0.04             | 0.66 ±0.00              | 0.83 ±0.00            | 0.92 ±0.02             |
|         | SVD-Phy | 0.59 ±0.00              | 0.73 ±0.01            | 0.76 ±0.02             | 0.55 ±0.00              | 0.59 ±0.01            | 0.64 ±0.02             | 0.65 ±0.00              | 0.78 ±0.02            | 0.92 ±0.01             |
|         | PPP     | 0.63 ±0.00              | 0.79 ±0.01            | 0.81 ±0.03             | 0.57 ±0.00              | 0.71 ±0.01            | 0.67 ±0.04             | 0.69 ±0.00              | 0.86 ±0.00            | 0.94 ±0.02             |
|         | Hamming | 0.64 ±0.00              | 0.79 ±0.01            | 0.82 ±0.02             | 0.58 ±0.00              | 0.70 ±0.01            | 0.65 ±0.03             | 0.69 ±0.00              | 0.86 ±0.01            | 0.93 ±0.01             |

**D**

|             |         | ROC AUC                 |                       |                        | pROC AUC                |                       |                        | AP                      |                       |                        |
|-------------|---------|-------------------------|-----------------------|------------------------|-------------------------|-----------------------|------------------------|-------------------------|-----------------------|------------------------|
|             |         | All genes - 1.6e5 pairs | Metazoa - 1.9e3 pairs | Chordata - 3.7e2 pairs | All genes - 1.6e5 pairs | Metazoa - 1.9e3 pairs | Chordata - 3.7e2 pairs | All genes - 1.6e5 pairs | Metazoa - 1.9e3 pairs | Chordata - 3.7e2 pairs |
| Para. filt. | MLPP    | 0.72 ±0.00              | 0.65 ±0.02            | 0.69 ±0.04             | 0.59 ±0.00              | 0.54 ±0.01            | 0.55 ±0.02             | 0.72 ±0.00              | 0.64 ±0.03            | 0.85 ±0.03             |
|             | NPP     | 0.56 ±0.00              | 0.67 ±0.01            | 0.72 ±0.04             | 0.53 ±0.00              | 0.58 ±0.01            | 0.59 ±0.04             | 0.58 ±0.00              | 0.69 ±0.01            | 0.87 ±0.03             |
|             | SVD-Phy | 0.55 ±0.00              | 0.64 ±0.01            | 0.70 ±0.02             | 0.53 ±0.00              | 0.52 ±0.01            | 0.57 ±0.02             | 0.57 ±0.00              | 0.60 ±0.02            | 0.85 ±0.02             |
|             | PPP     | 0.59 ±0.00              | 0.70 ±0.01            | 0.77 ±0.04             | 0.53 ±0.00              | 0.61 ±0.01            | 0.60 ±0.04             | 0.60 ±0.00              | 0.73 ±0.01            | 0.89 ±0.03             |
|             | Hamming | 0.61 ±0.00              | 0.71 ±0.01            | 0.78 ±0.02             | 0.55 ±0.00              | 0.60 ±0.01            | 0.59 ±0.02             | 0.62 ±0.00              | 0.72 ±0.01            | 0.89 ±0.02             |

**Young Genes** – (A) Phylogenetic profiles as binary presence or absence of genes. The genes are stratified for genes found exclusively in Chordata or Metazoa (inclusive). (B) Zoom-in on the inset in (A). In both A-B, rows are genes and columns are organisms ordered as in Supp. Figure 1. Blue represents presence. Genes are ordered by the farthest shared ancestor with human from the closest (e.g. mammalian specific genes) to farthest (e.g. genes found in all eukaryotes) and from sparsely present to highly present.



Approaches

# Functional Interaction (Reactome)

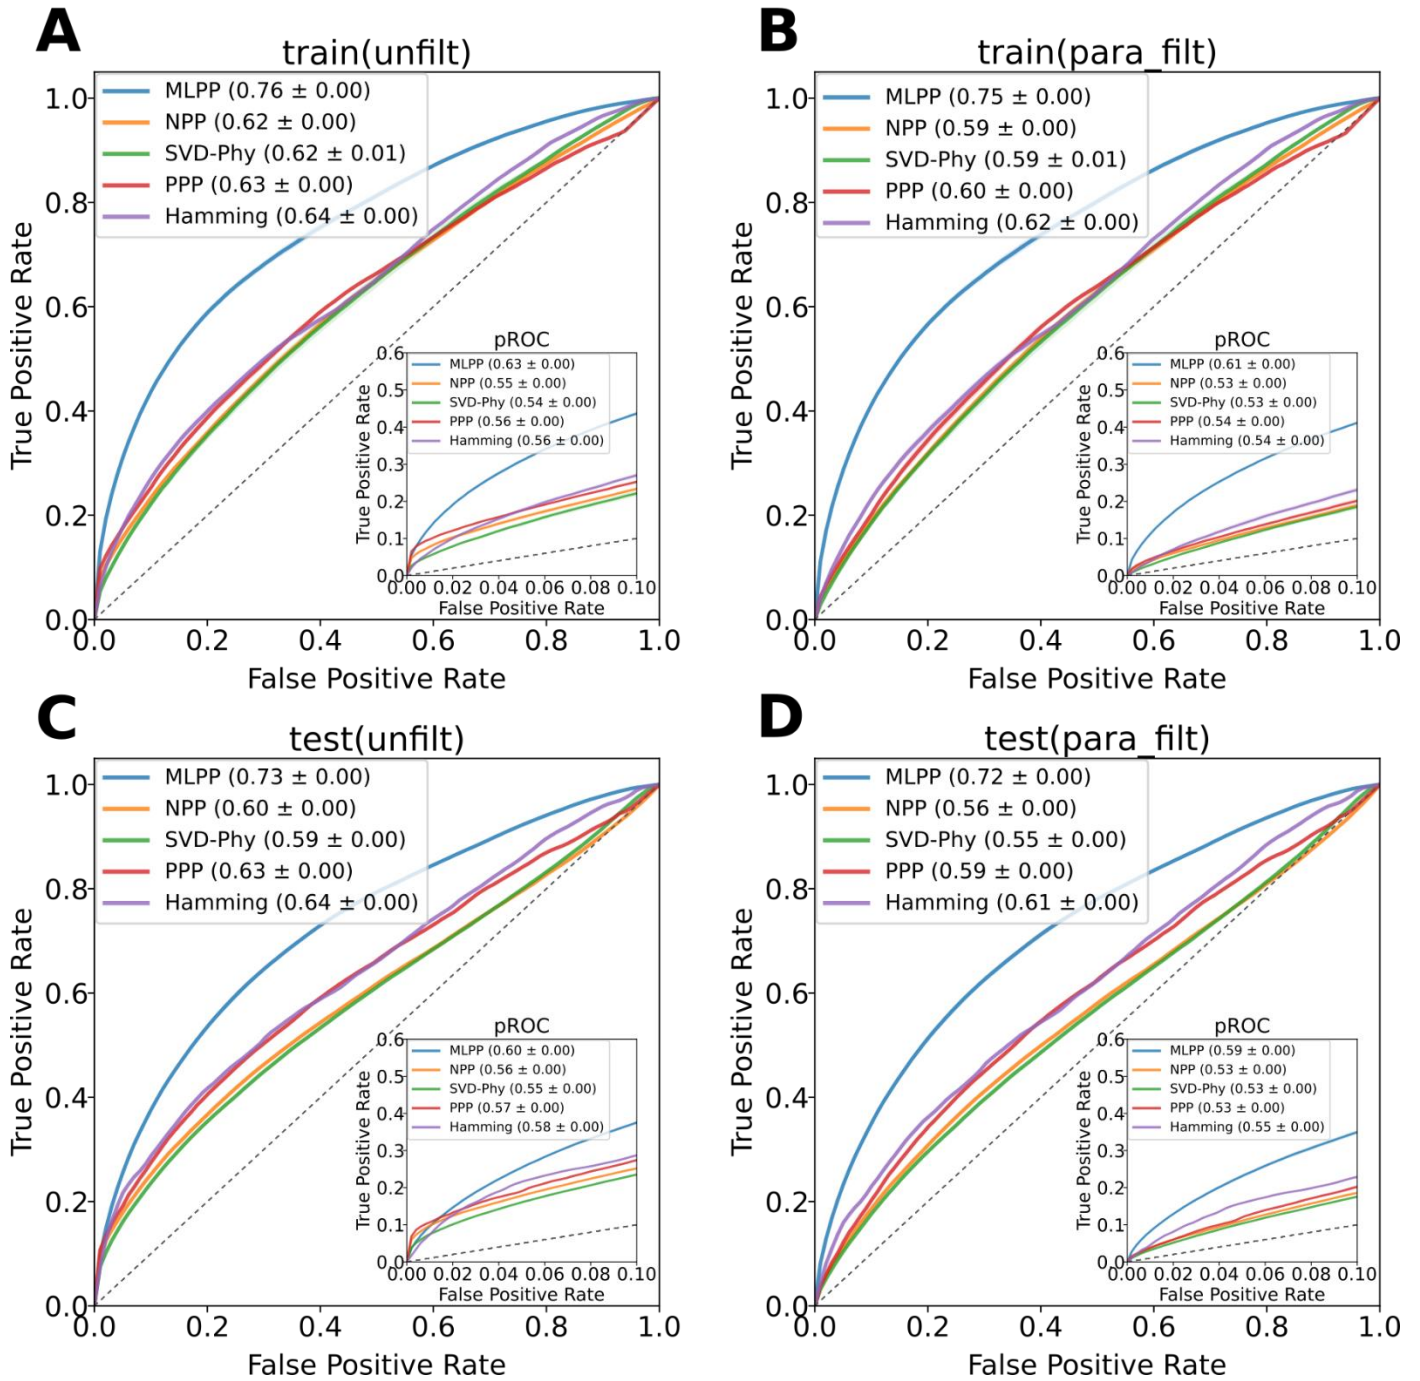

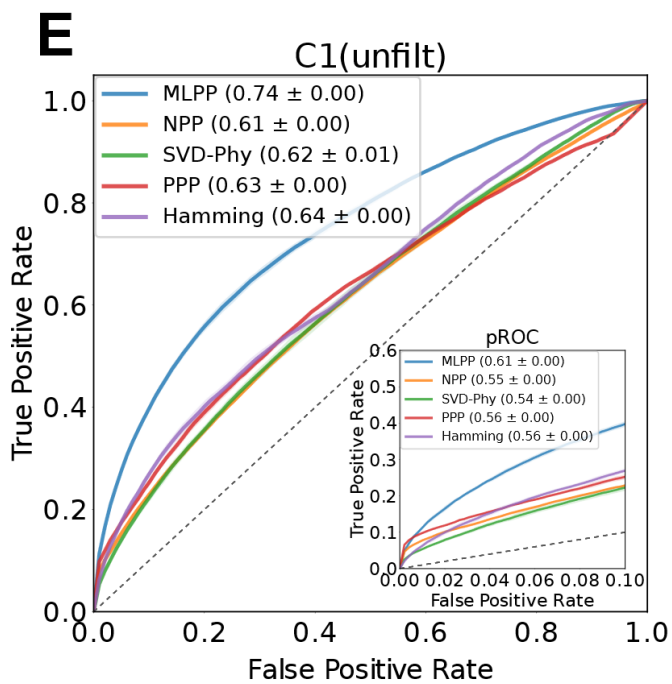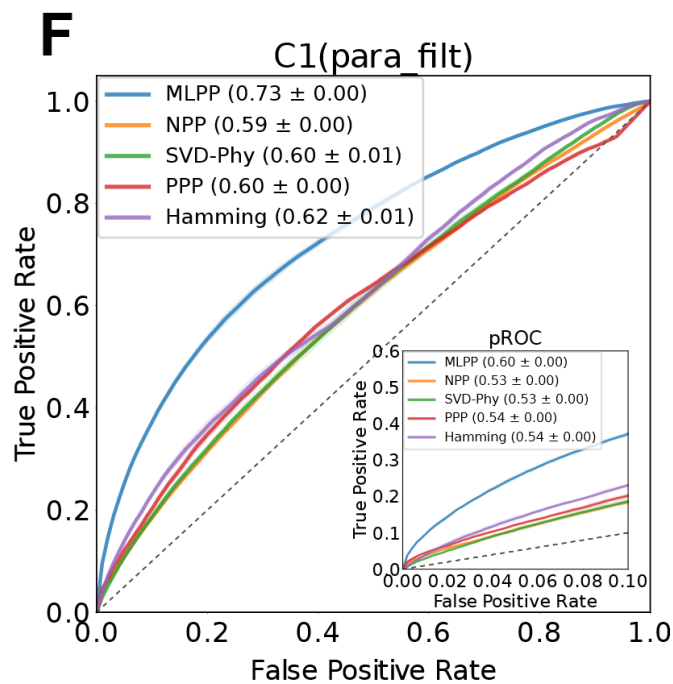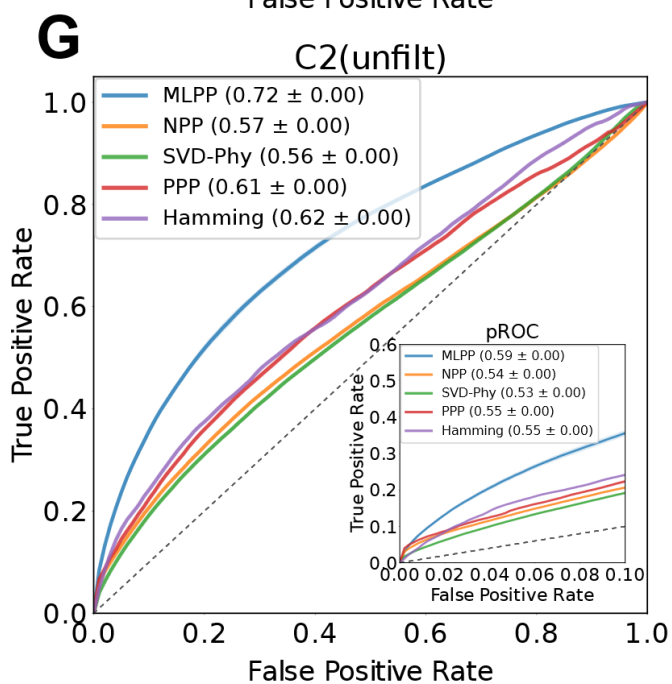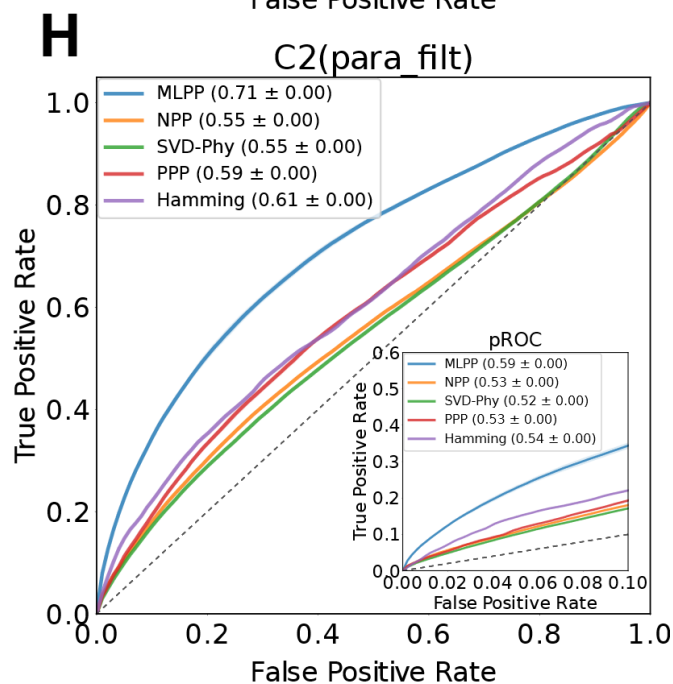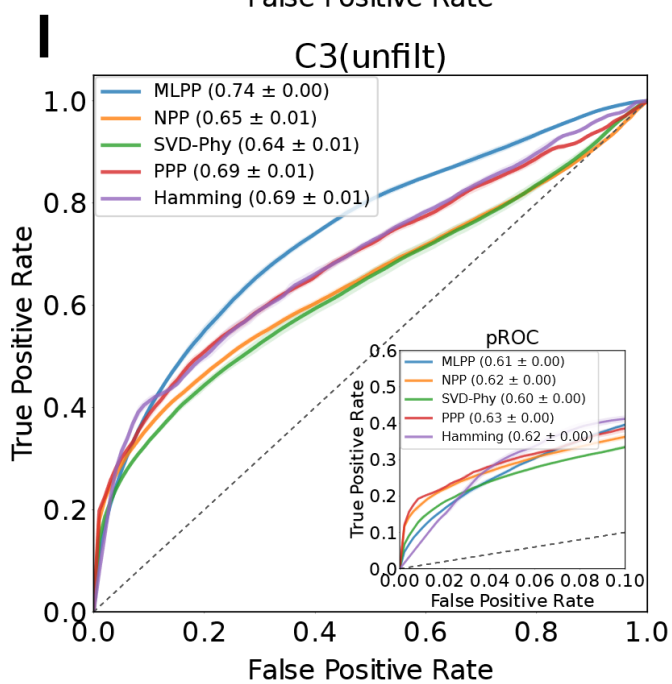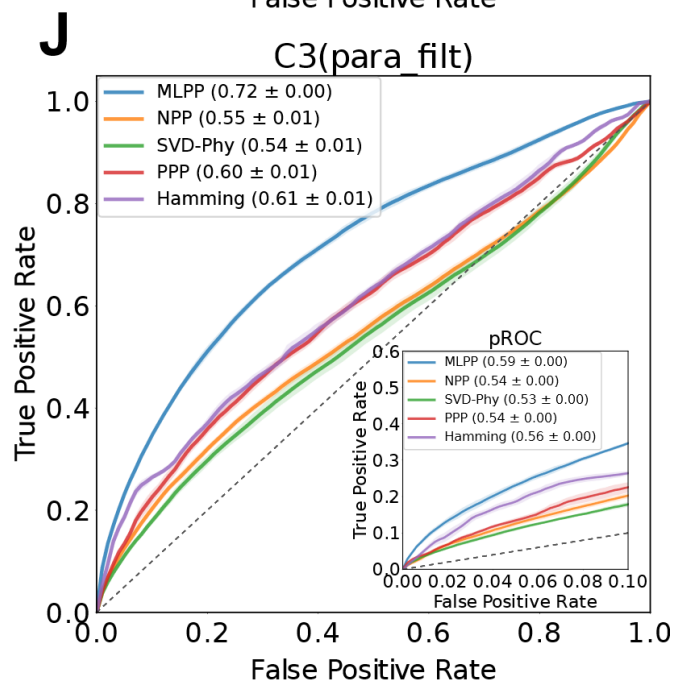

**K**

train(unfilt)

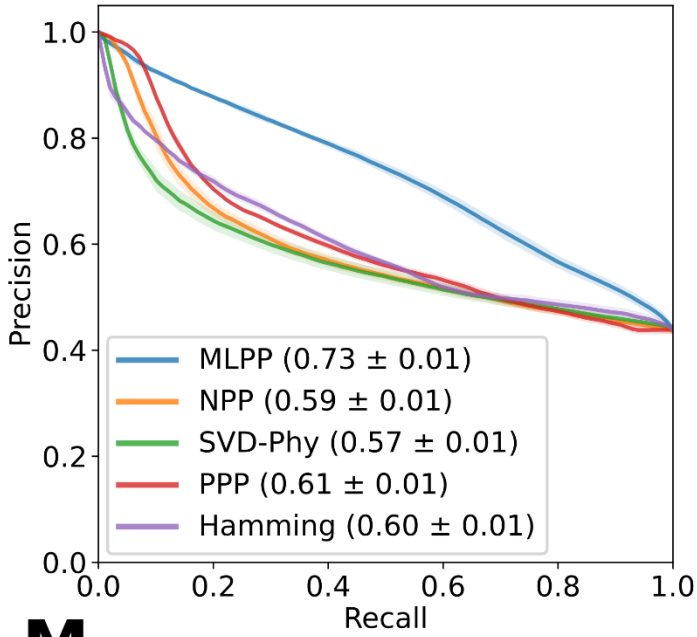**L**

train(para\_filt)

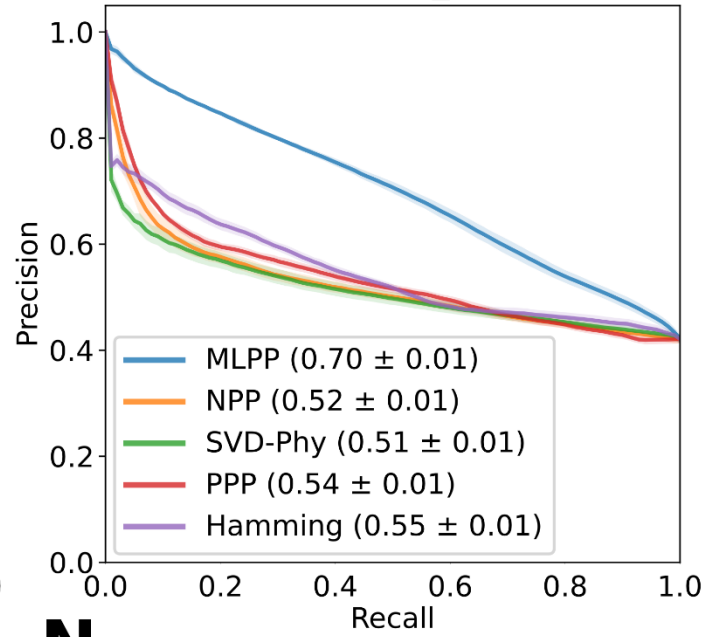**M**

test(unfilt)

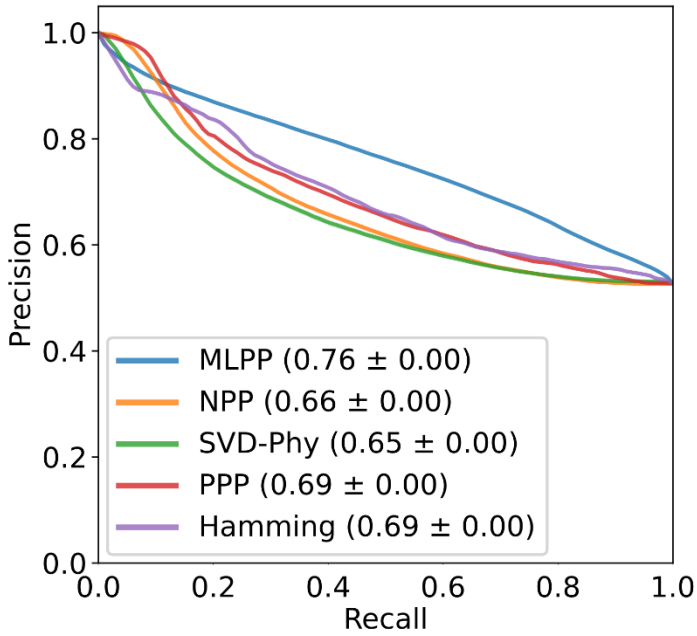**N**

test(para\_filt)

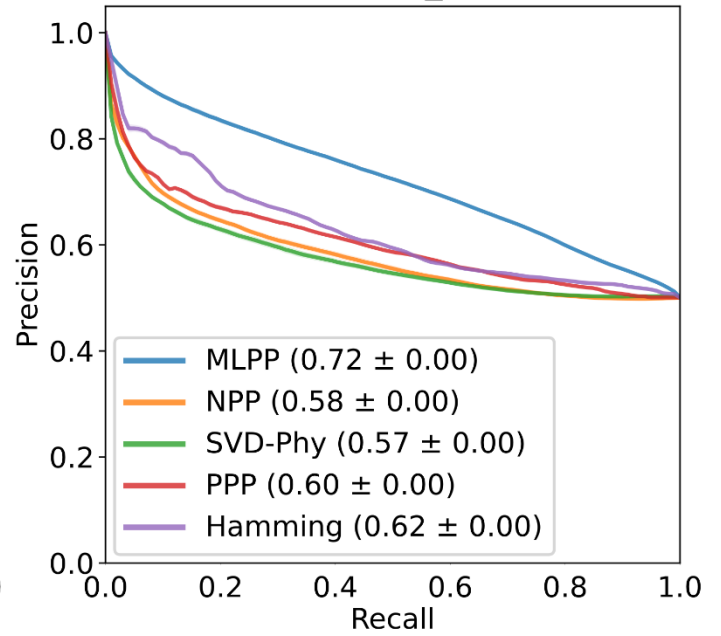

**O**

C1(unfilt)

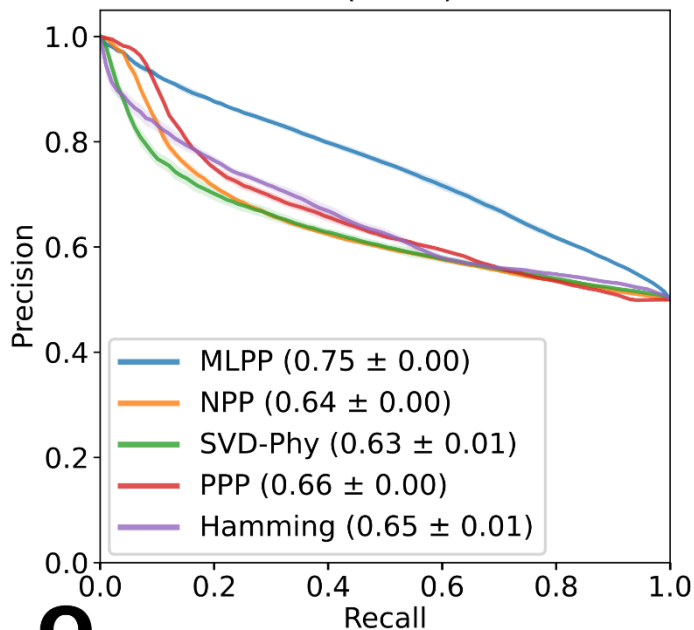**P**

C1(para\_filt)

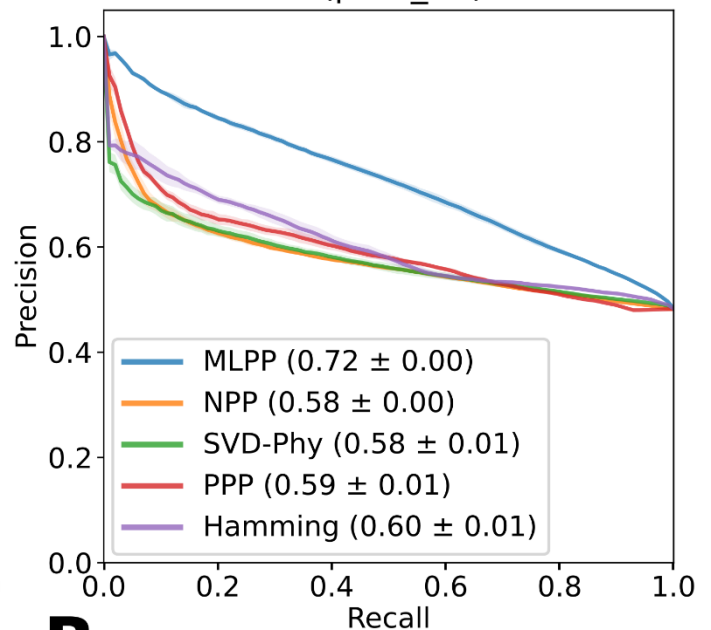**Q**

C2(unfilt)

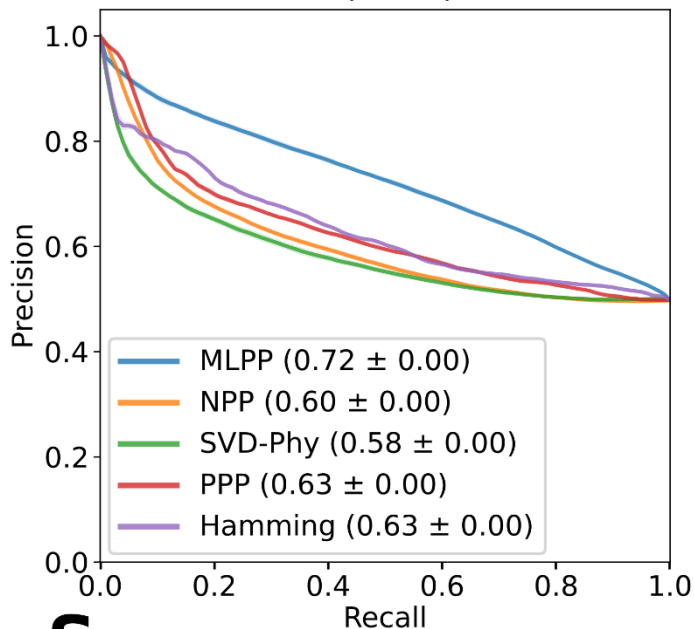**R**

C2(para\_filt)

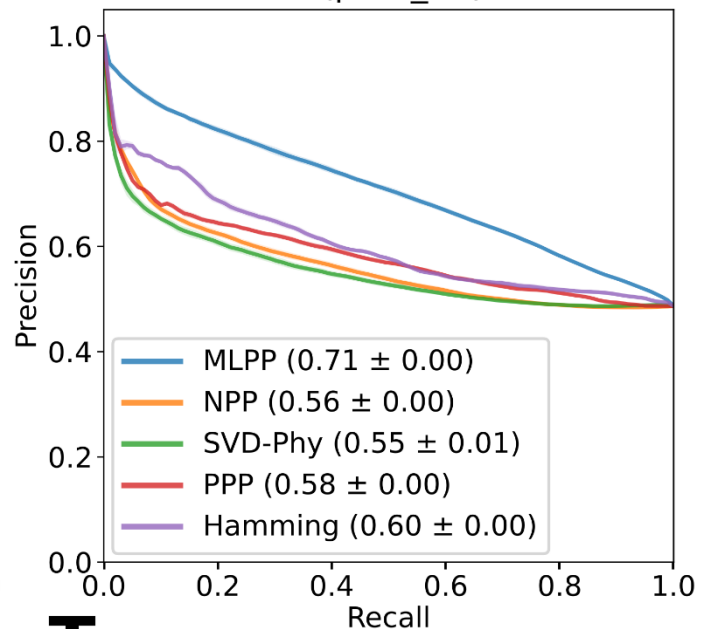**S**

C3(unfilt)

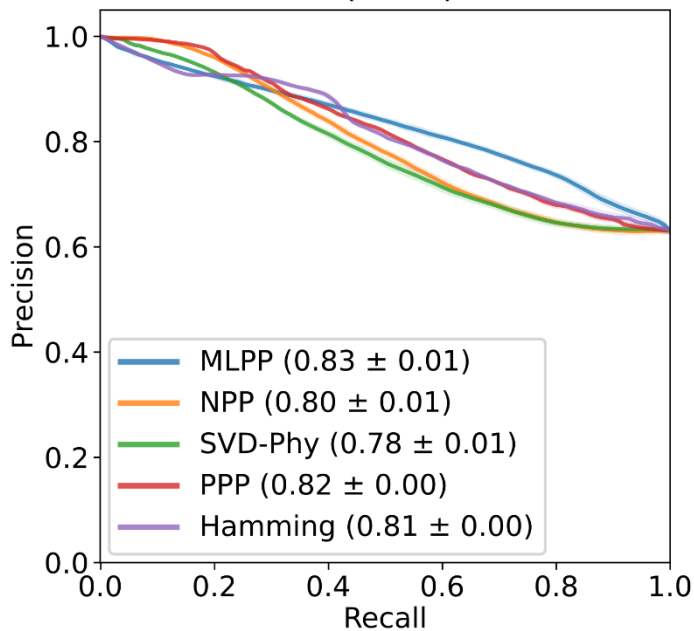**T**

C3(para\_filt)

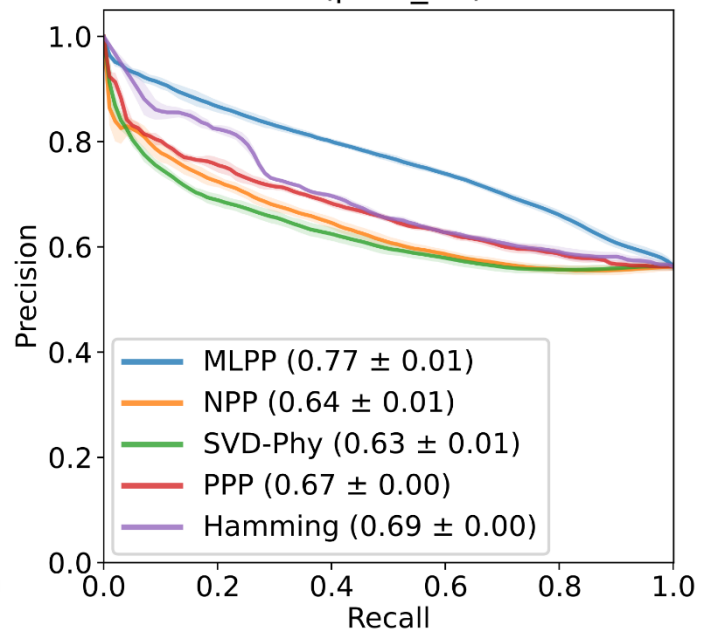

**Model Performance (Functional Interaction Model) - Comparing Phylogenetic Profiling Approaches.** (A-J) PP algorithms were compared on the basis of predicting gene pair functional interaction (co-occurrence in Reactome pathway). Performance was measured using a ROC curve and the AUC (A-J) as well as the PR curve and its AP (K-T). In the inset of each panel is a pROC curve for the FPR range (0-0.1). C1 (E-F, O-P), C2 (G-H, Q-R), and C3 (I-J, S-T) are stratifications for pairwise prediction where both, one, or none of a pair of genes appears in the training set, respectively (see Methods, based on <sup>1</sup>). Model evaluation was conducted with (A, C, E, G, I, K, M, O, Q, S) or without (B, D, F, H, J, L, N, P, R, T) paralogous pairs. Numbers in brackets are the AUC/AP and the standard deviation of the AUC/AP in cross-validations for ROC/PR curves, respectively. Numbers in brackets for the insets are the pAUC and standard deviation. MLPP - machine learning phylogenetic profiling (the method presented in this paper), NPP - normalized phylogenetic profiling, PPP - PrePhyloPro, Hamming - Hamming distance on binarized phylogenetic profiles, ROC - receiver operator characteristics, AUC - area under the curve, pROC - partial ROC curve, FPR - false positive rate, PR - precision recall, A<sub>avg</sub> - average precision. Source data are provided as a Source Data file.

# Reactome Temporal Splits

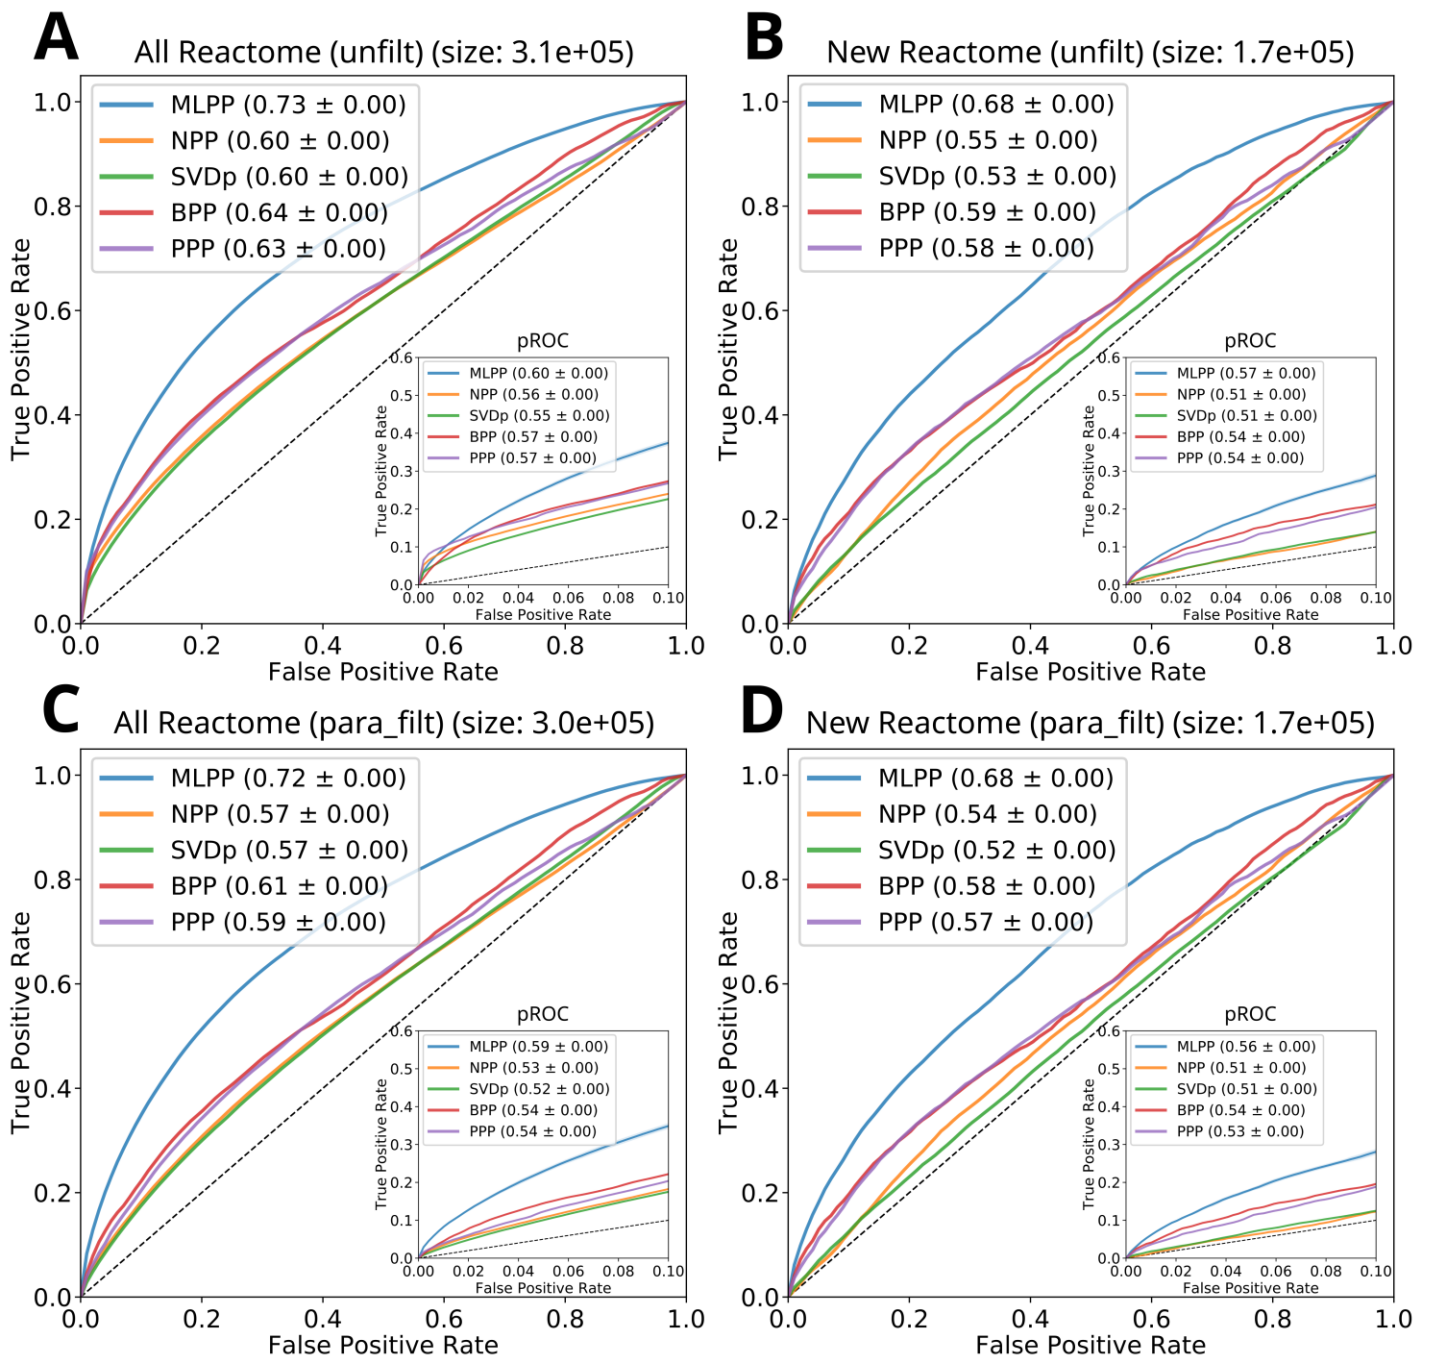

**Reactome Temporal Splits-** (A-H) Model performance in functional interactions from Reactome (01.2021) using a model trained on an earlier snapshot (02.2019). Performance was measured by a ROC curve and the AUC. In the inset of each panel is a pROC curve for the FPR range (0-0.1). Model evaluation was conducted with (A, B, E, F - “unfilt”) or without (C, D, G, H - “para\_filt”) paralogous pairs, and with (A, C, E, G) or without (B, D, F, H) pairs that appear in the older Reactome snapshot used for training. Numbers in brackets are the AUC and the standard deviation of the AUC in cross-validations. ROC - receiver operator characteristics, AUC - area under the curve, pROC - partial ROC curve, FPR - false positive rate. Source data are provided as a Source Data file.

# BioGrid

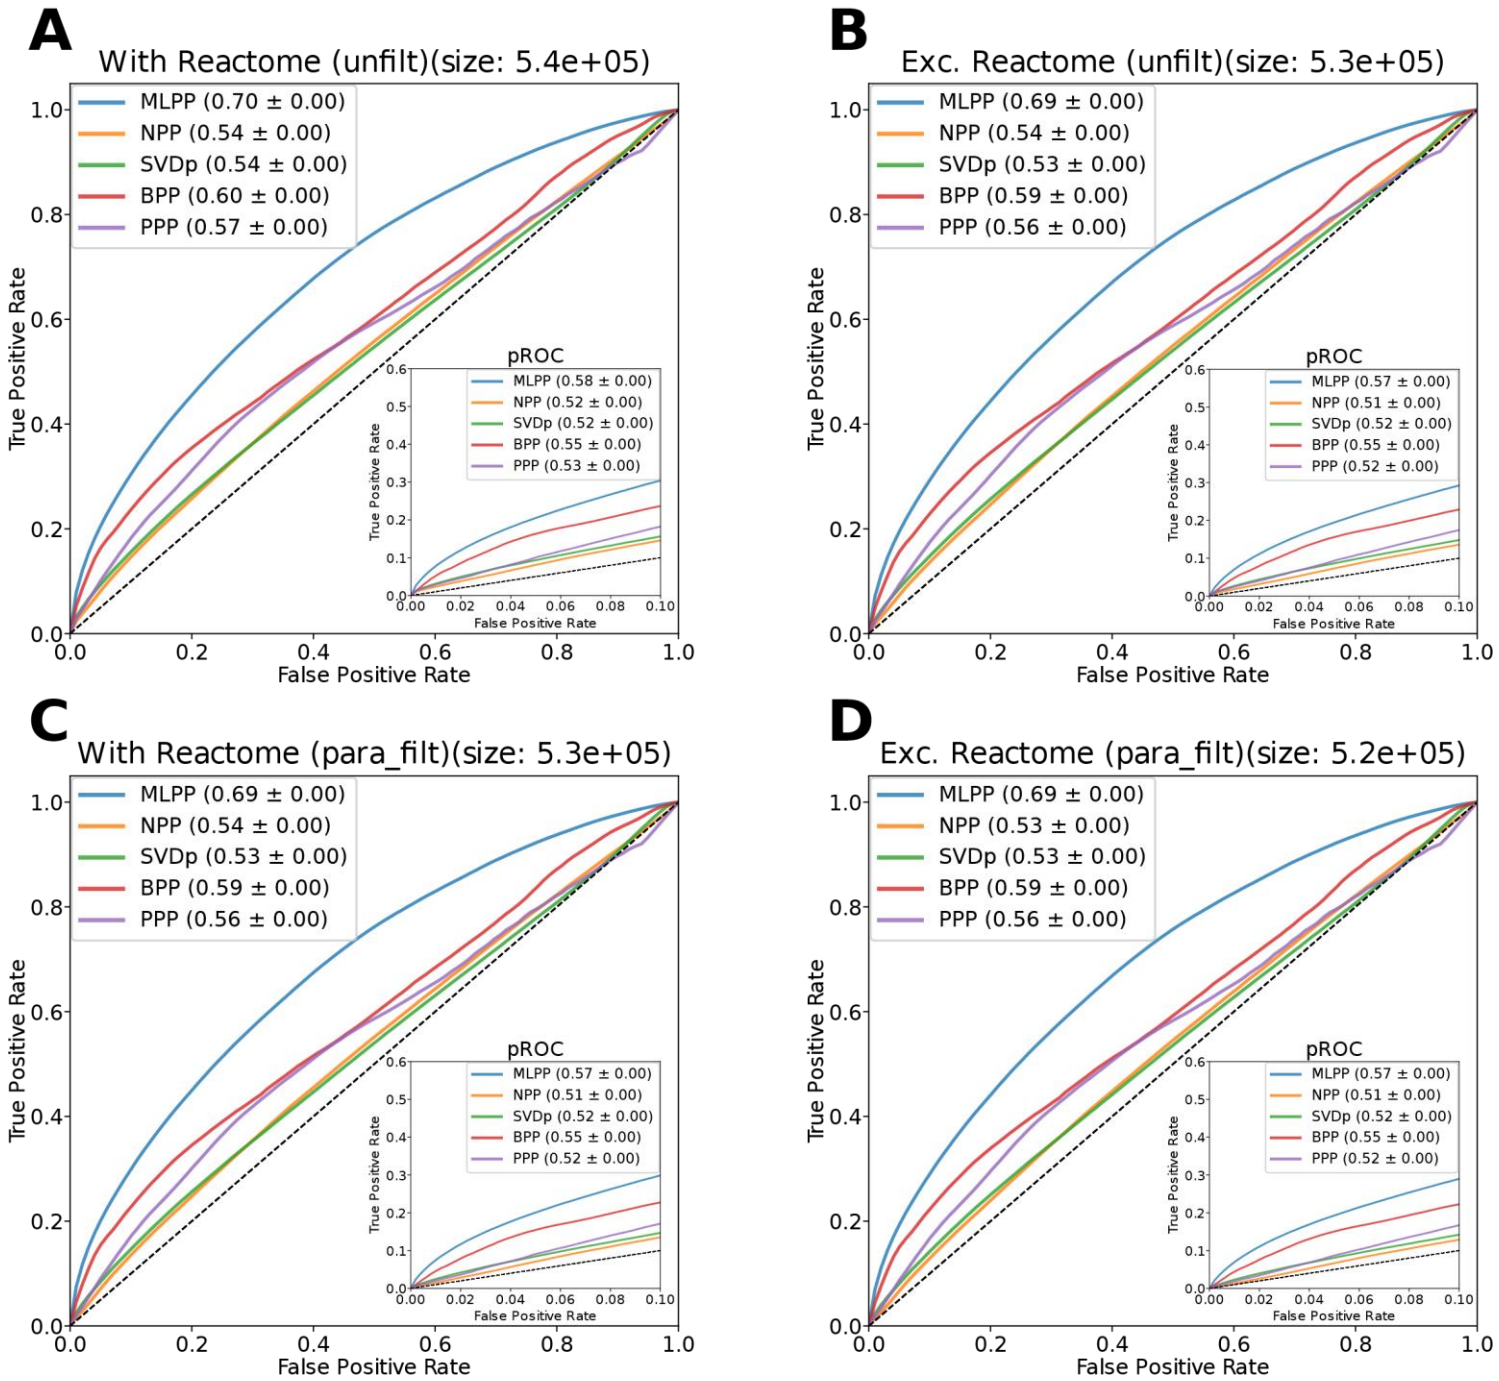

# IntAct

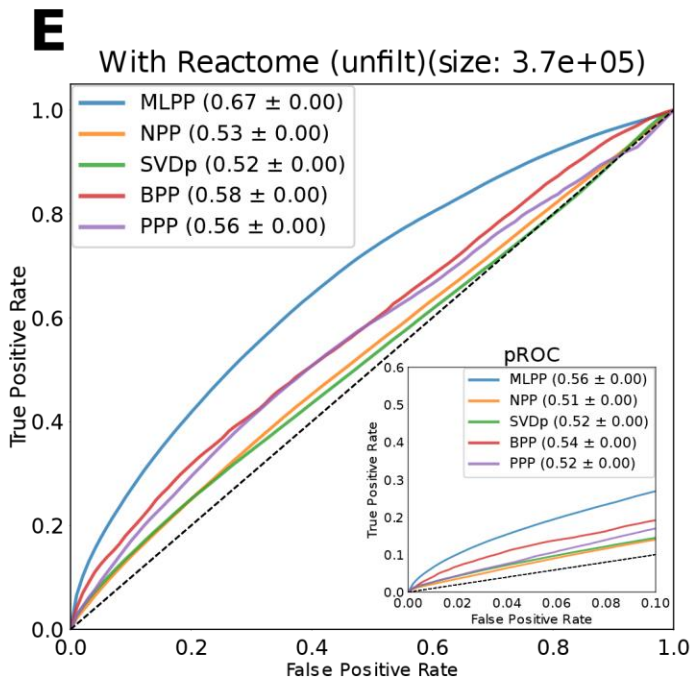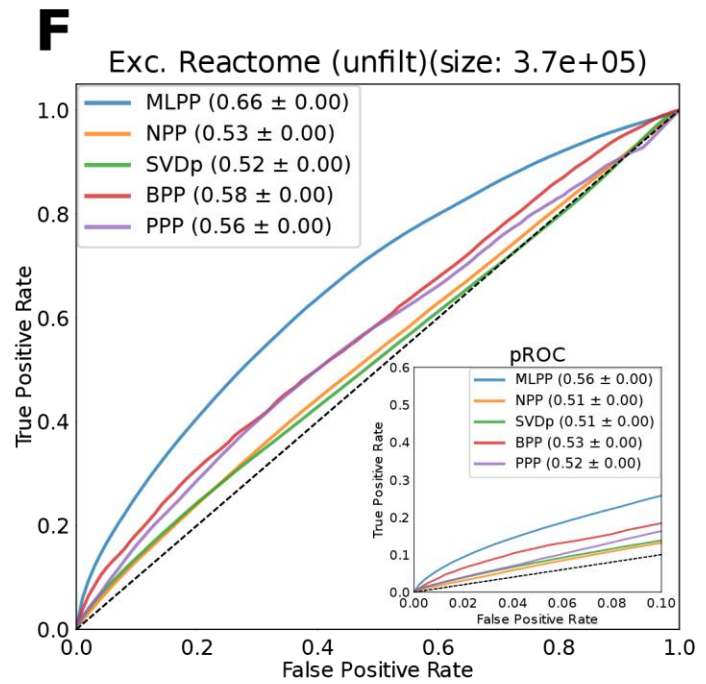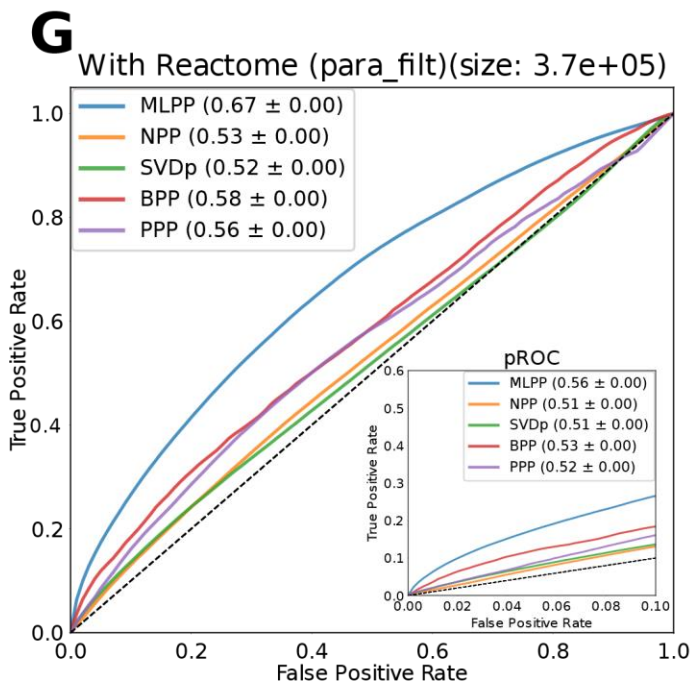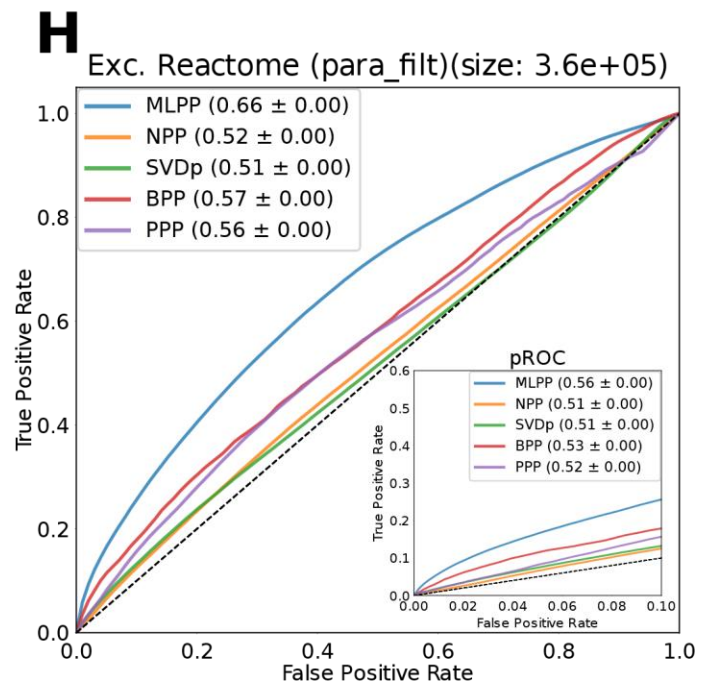

**External Validation – PPI** - (A-H) Model performance in predicting protein-protein interactions (PPI) in BioGrid (A-D) or the IntAct (E-H) databases. Performance was measured by a ROC curve and the AUC. In the inset of each panel is a pROC curve for the FPR range (0-0.1). Model evaluation was conducted with pairs of paralogs (A, B, E, F - “unfilt”) or without (C, D, G, H - “para\_filt”) and with pairs that appear in Reactome, the database used for training (A, C, E, G) or without (B, D, F, H). Numbers in brackets are the AUC and the standard deviation of the AUC in cross-validations. ROC - receiver operator characteristics, AUC - area under the curve, pROC - partial ROC curve, FPR - false positive rate.



## Supplementary Figure 8 - External Validation – KEGG

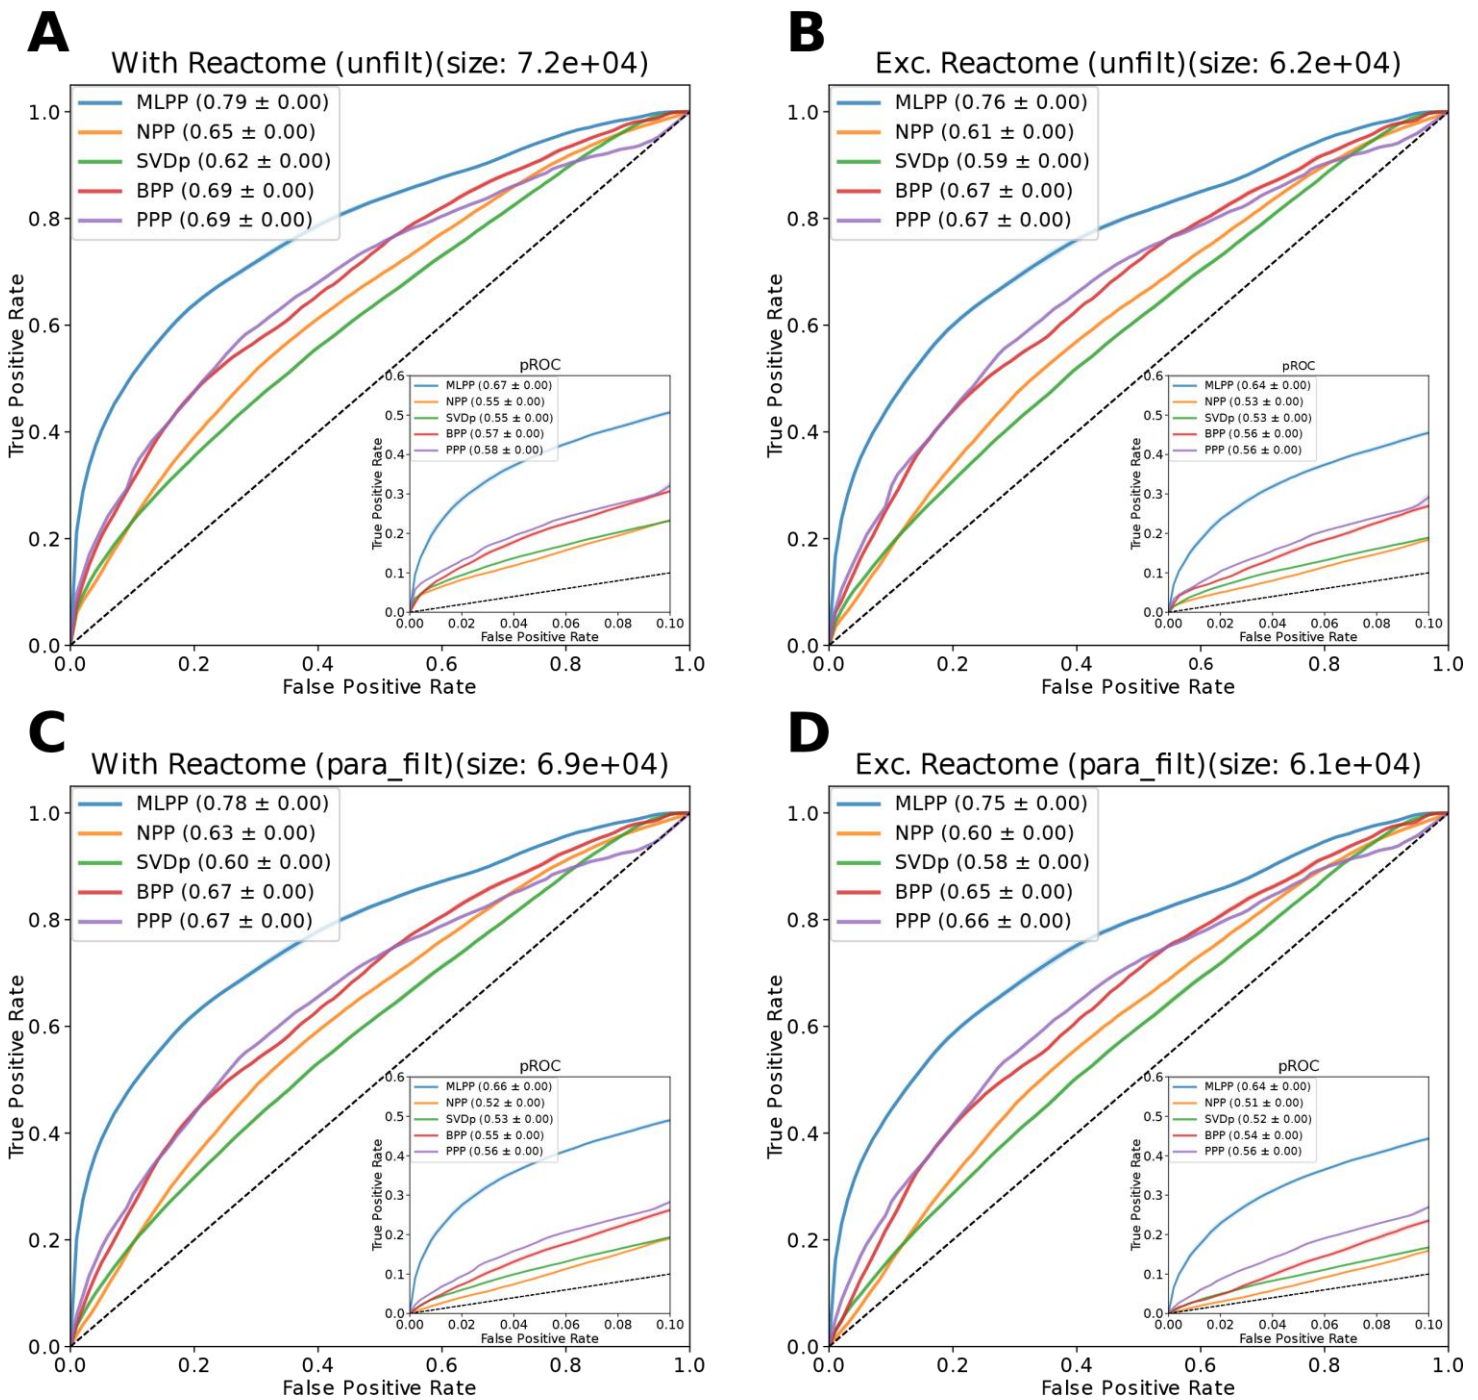

**External Validation – KEGG** - (A-D) Model performance in predicting gene pair co-occurrence in KEGG pathways as measured by a ROC curve and the AUC. In the inset of each panel is a pROC curve for the FPR range (0-0.1). Model evaluation was conducted with pairs of paralogs (A, B - “unfilt”) or without (C, D - “para\_filt”) and with pairs that appear in Reactome, the database used for training (A,C) or without (B,D). Numbers in brackets are the AUC and the standard deviation of the AUC in cross-validations. ROC - receiver operator characteristics, AUC - area under the curve, pROC - partial ROC curve, FPR - false positive rate.

Supplementary Figure 9 - External Validation – Complexes (Functional Interaction Model)

CORUM

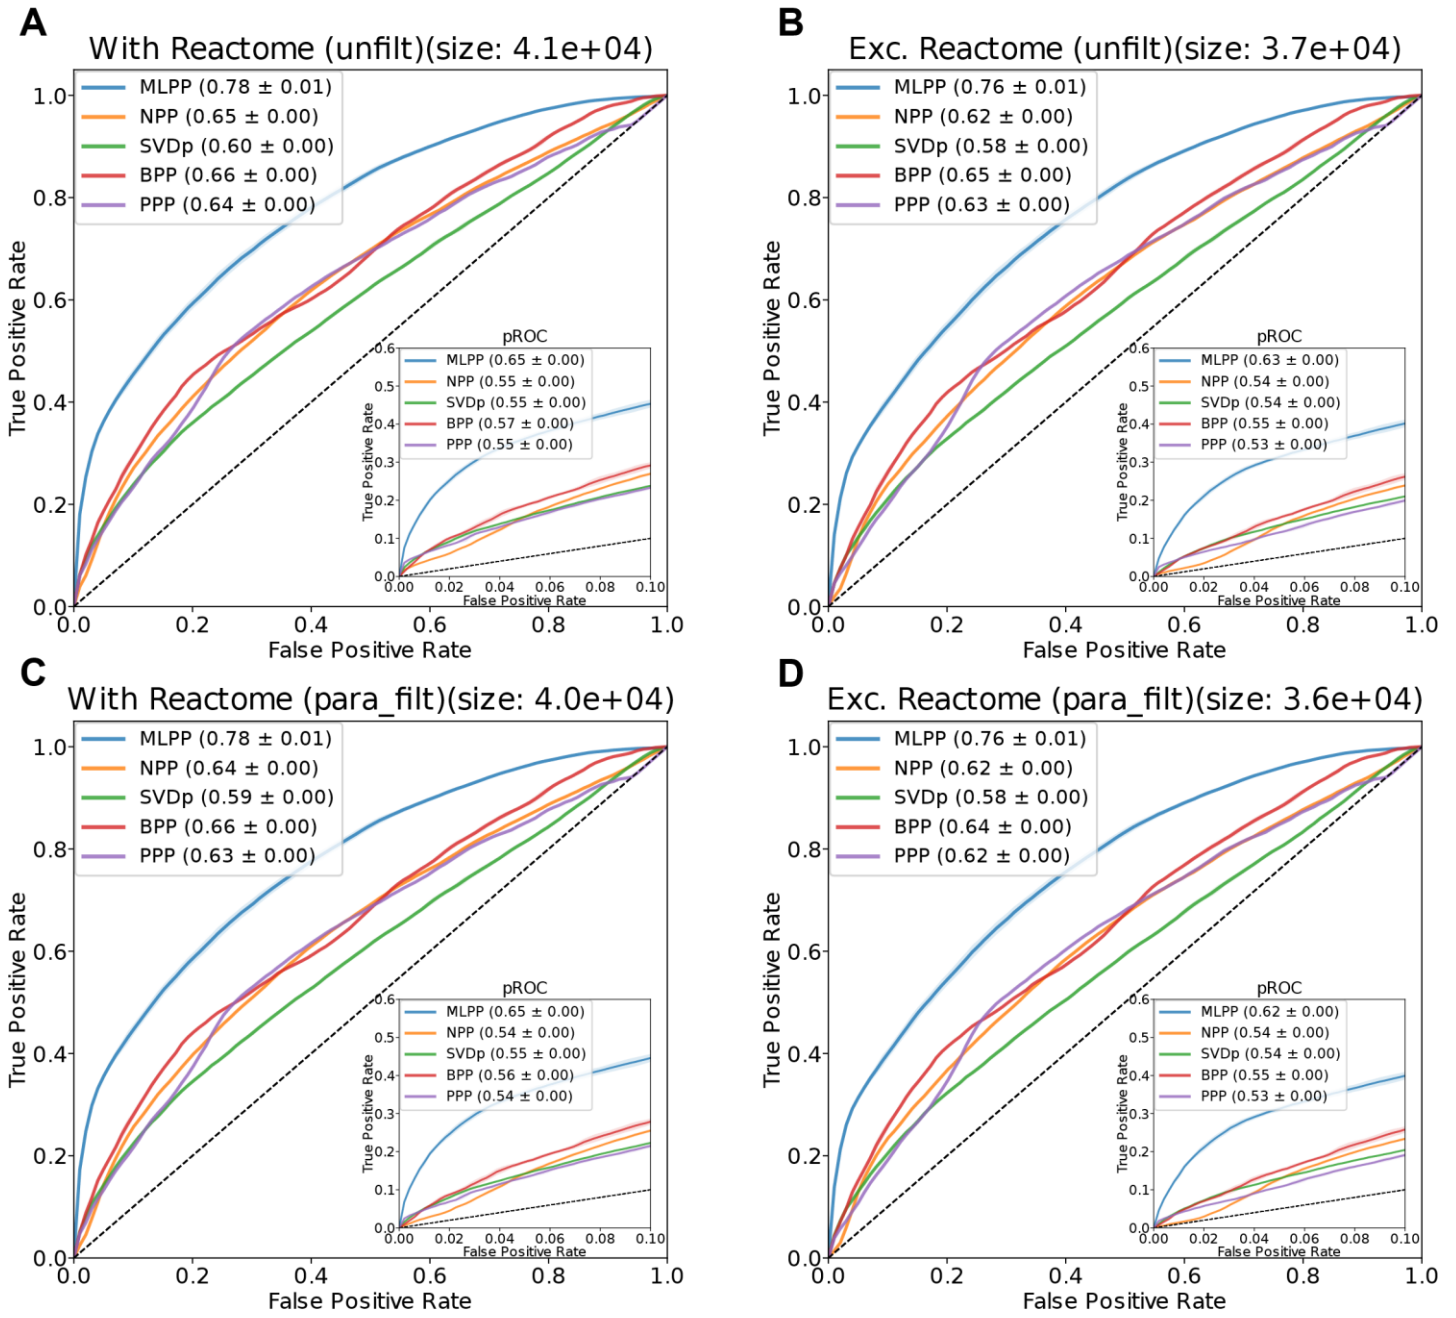

## IntAct Complex

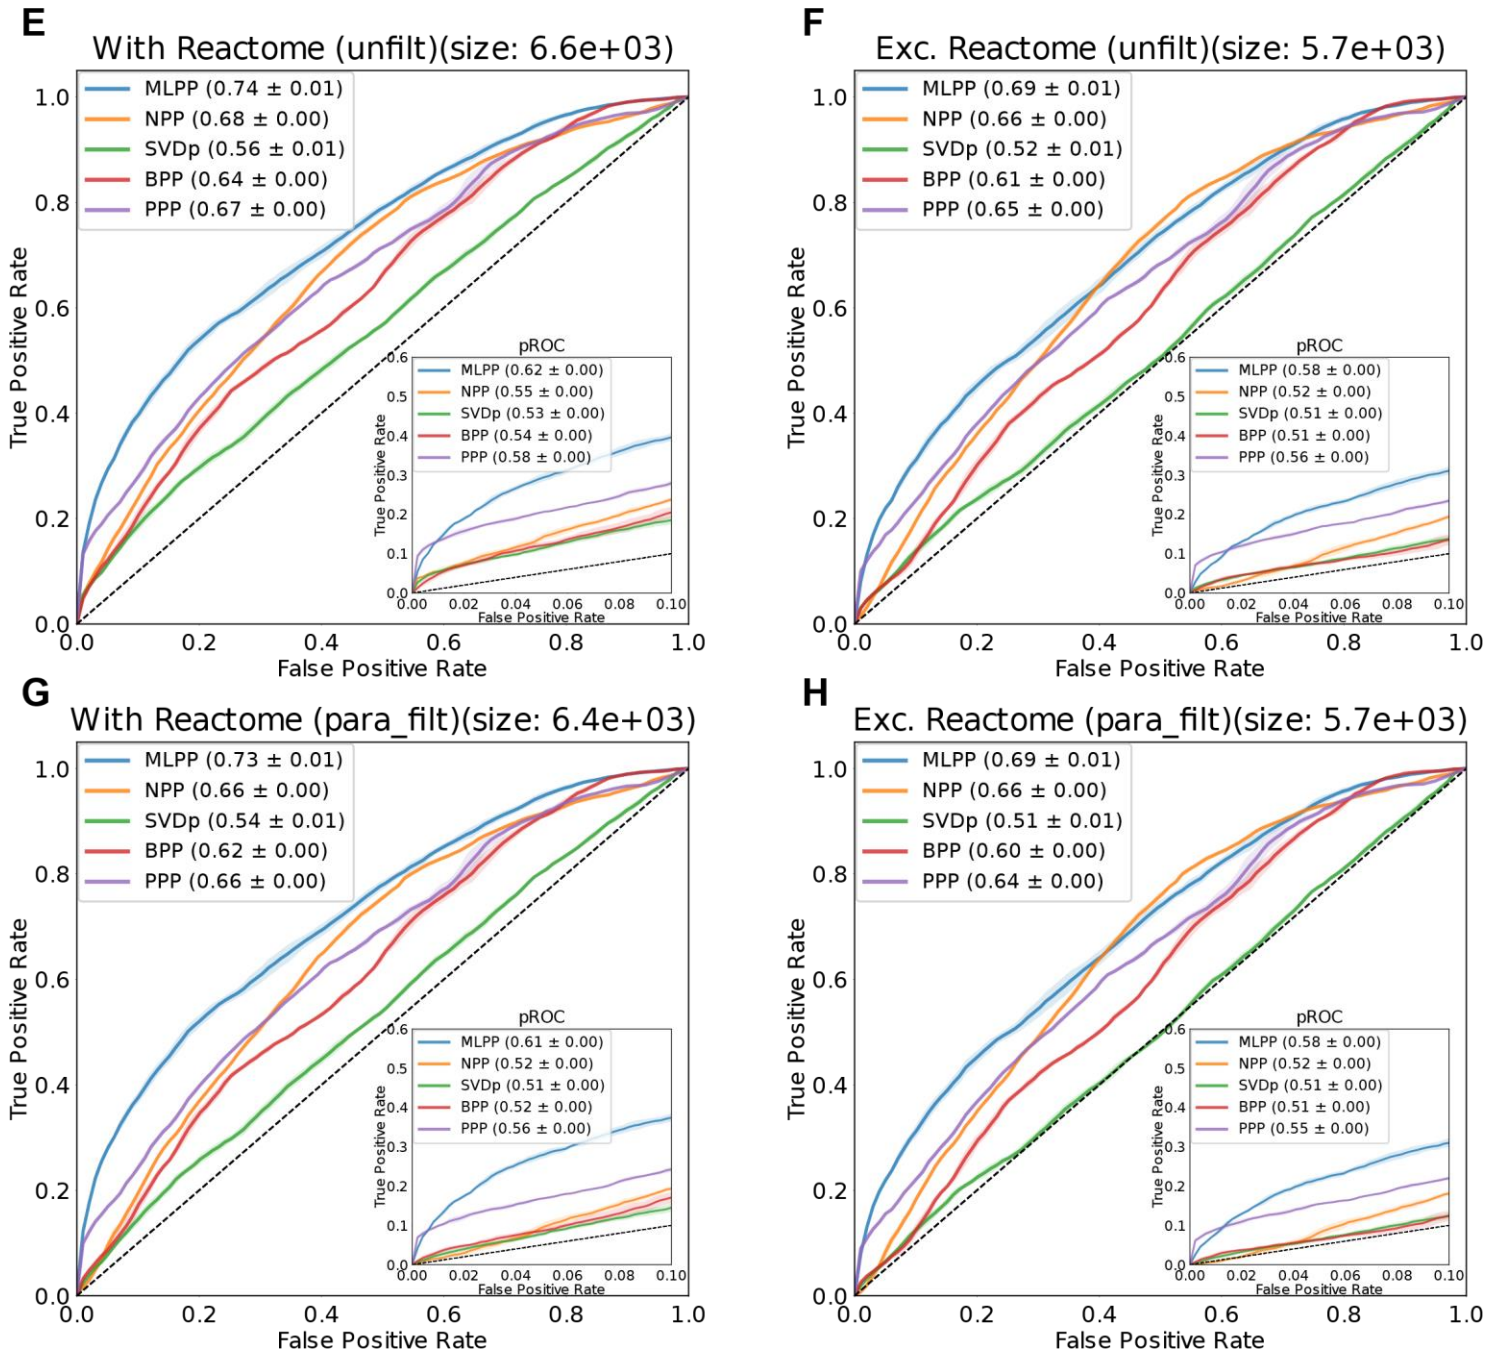

**External Validation – Complexes (Functional Interaction Model) - (A-H) Model performance in predicting complex co-occurrence in CORUM (A-D) or the IntAct Complex (E-H) databases. Performance was measured by a ROC curve and the AUC and using the Functional Interaction model. In the inset of each panel is a pROC curve for the FPR range (0-0.1). Model evaluation was conducted with pairs of paralogs (A, B, E, F - “unfilt”) or without (C, D, G, H - “para\_filt”) and with pairs that appear in Reactome, the database used for training (A, C, E, G) or without (B, D, F, H). Numbers in brackets are the AUC and the standard deviation of the AUC in cross-validations. ROC - receiver operator characteristics, AUC - area under the curve, pROC - partial ROC curve, FPR - false positive rate.**

# Supplementary Figure 10 - External Validation – Complexes (In Complex Model)

## CORUM

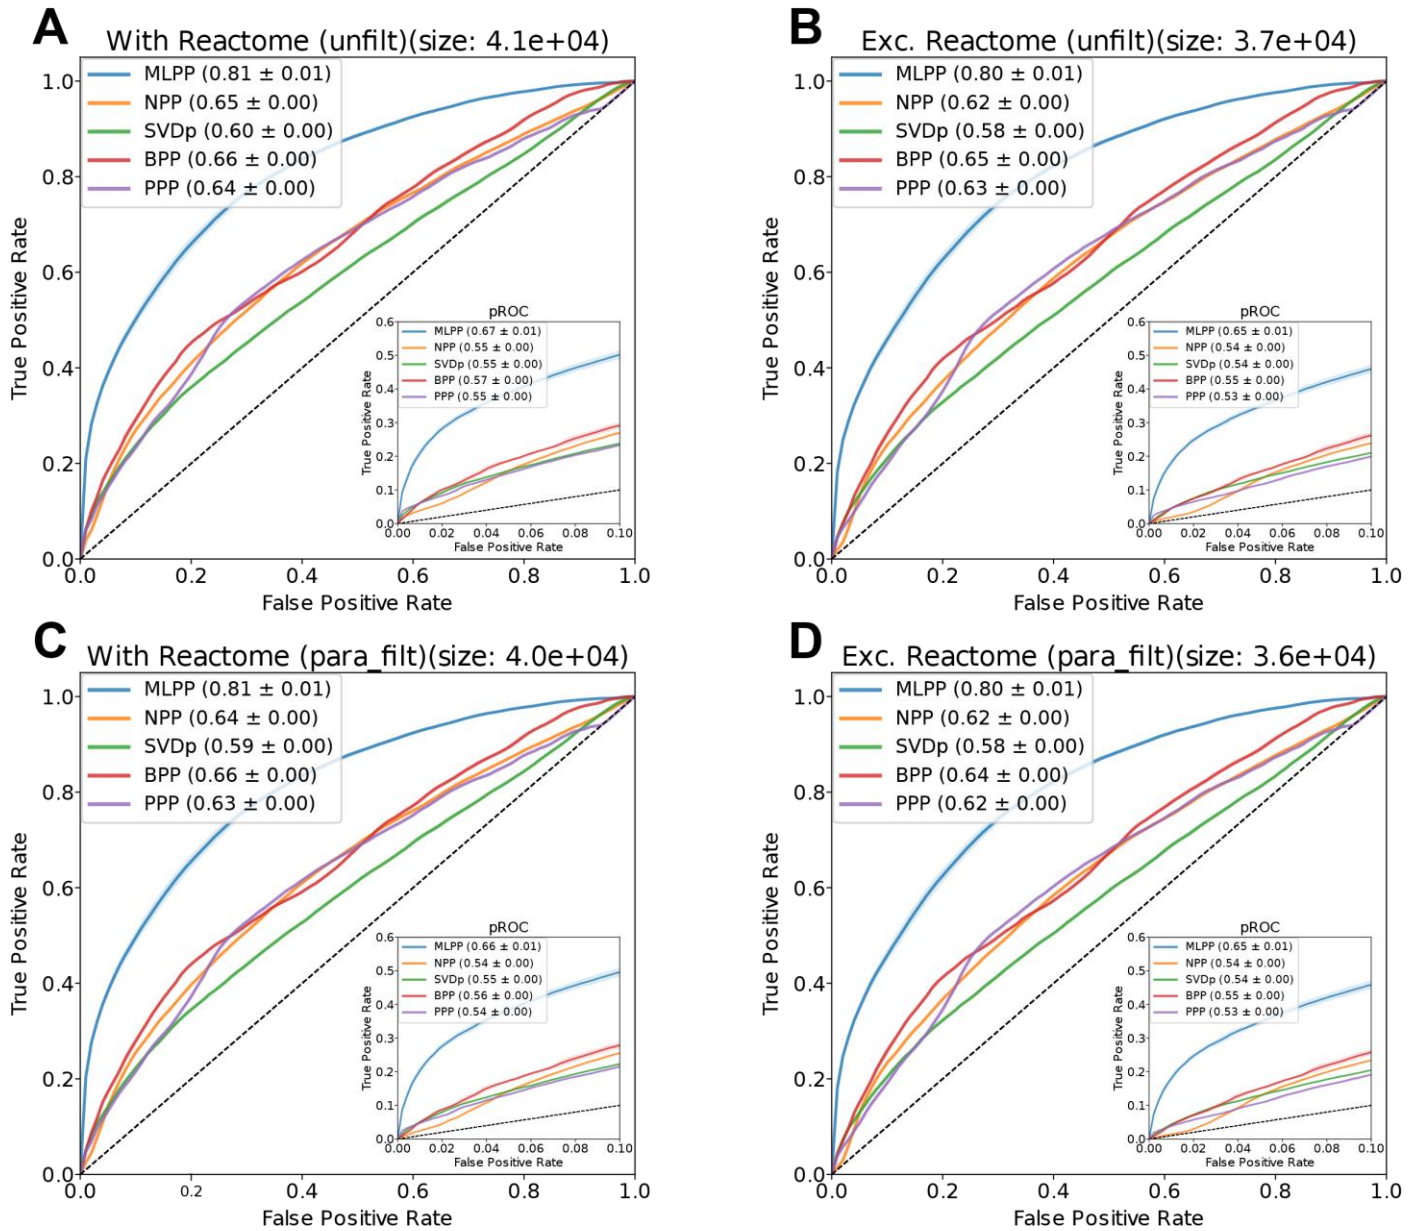

## IntAct Complex

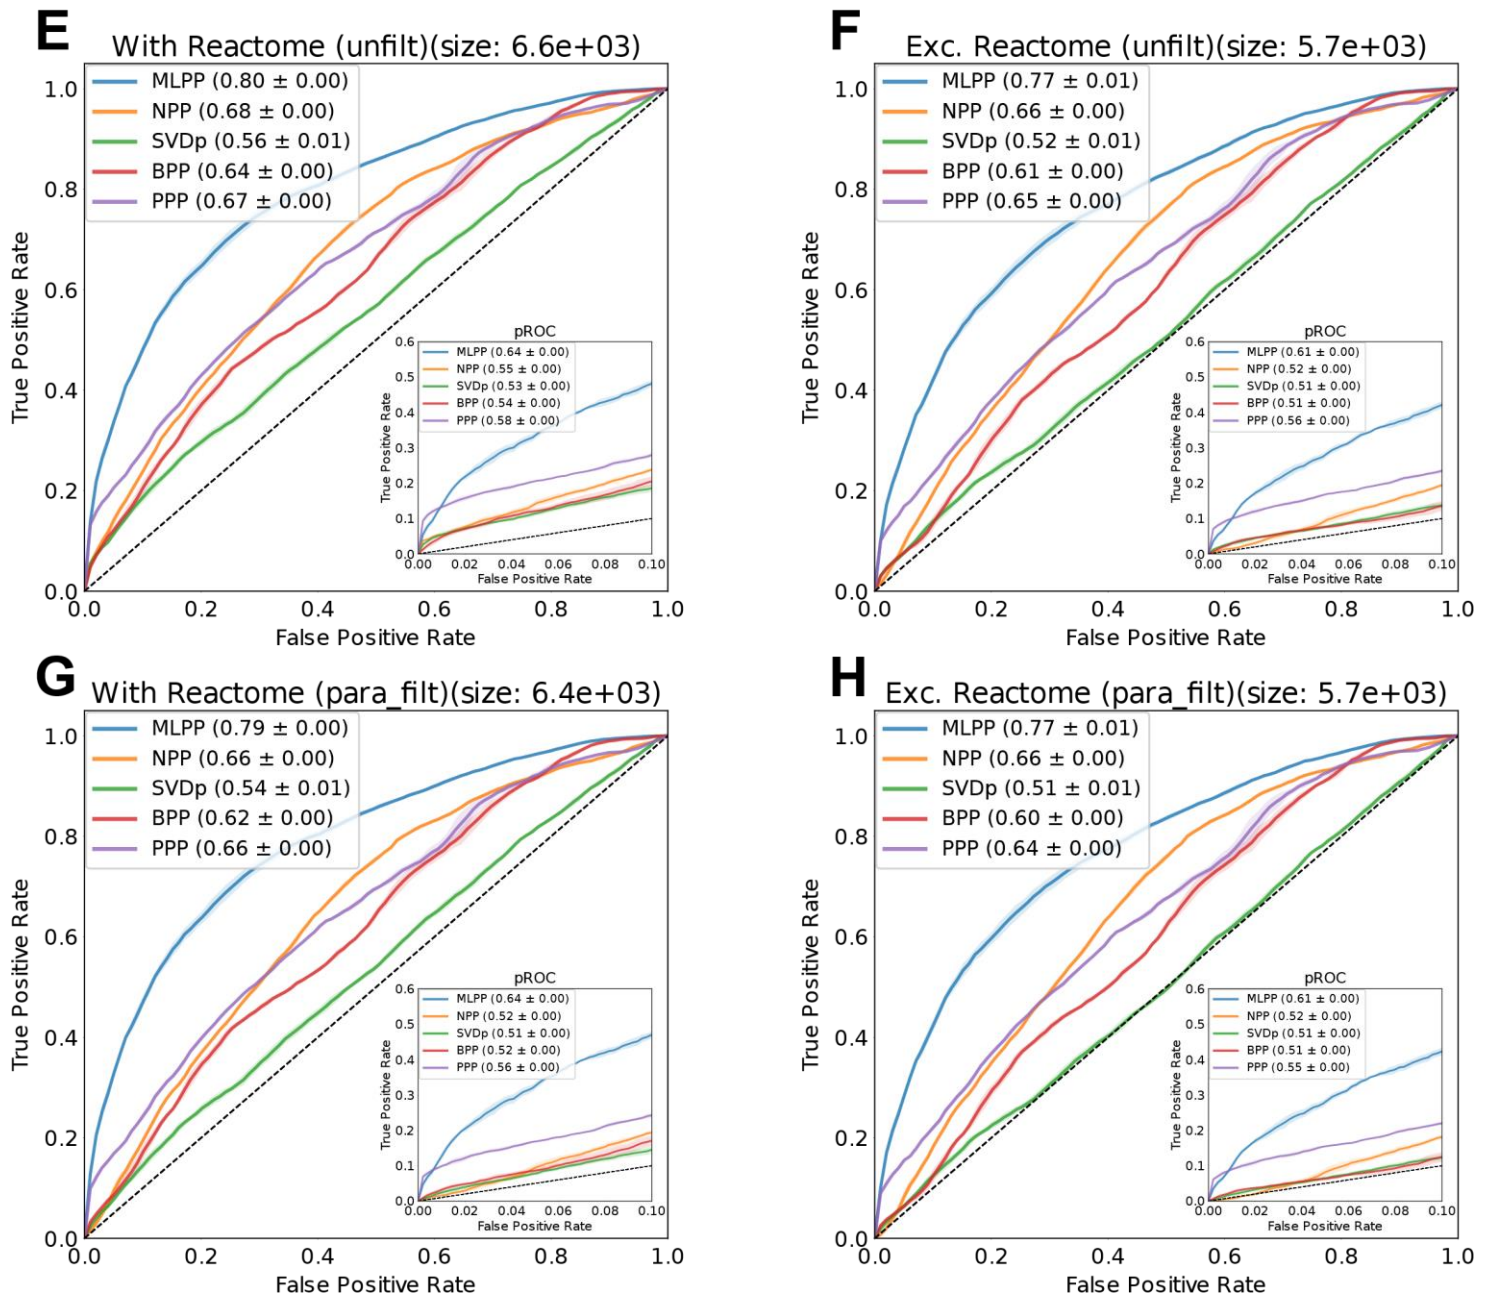

**External Validation – Complexes (In Complex Model)** - (A-H) Model performance in predicting complex co-occurrence in CORUM (A-D) or the IntAct Complex (E-H) databases. Performance was measured by a ROC curve and the AUC and using the In Complex model. In the inset of each panel is a pROC curve for the FPR range (0-0.1). Model evaluation was conducted with pairs of paralogs (A, B, E, F - “unfilt”) or without (C, D, G, H - “para\_filt”) and with pairs that appear in Reactome, the database used for training (A, C, E, G) or without (B, D, F, H). Numbers in brackets are the AUC and the standard deviation of the AUC in cross-validations. ROC - receiver operator characteristics, AUC - area under the curve, pROC - partial ROC curve, FPR - false positive rate.

Supplementary Figure 11 - Performance Comparison on the Pathway Level

KEGG

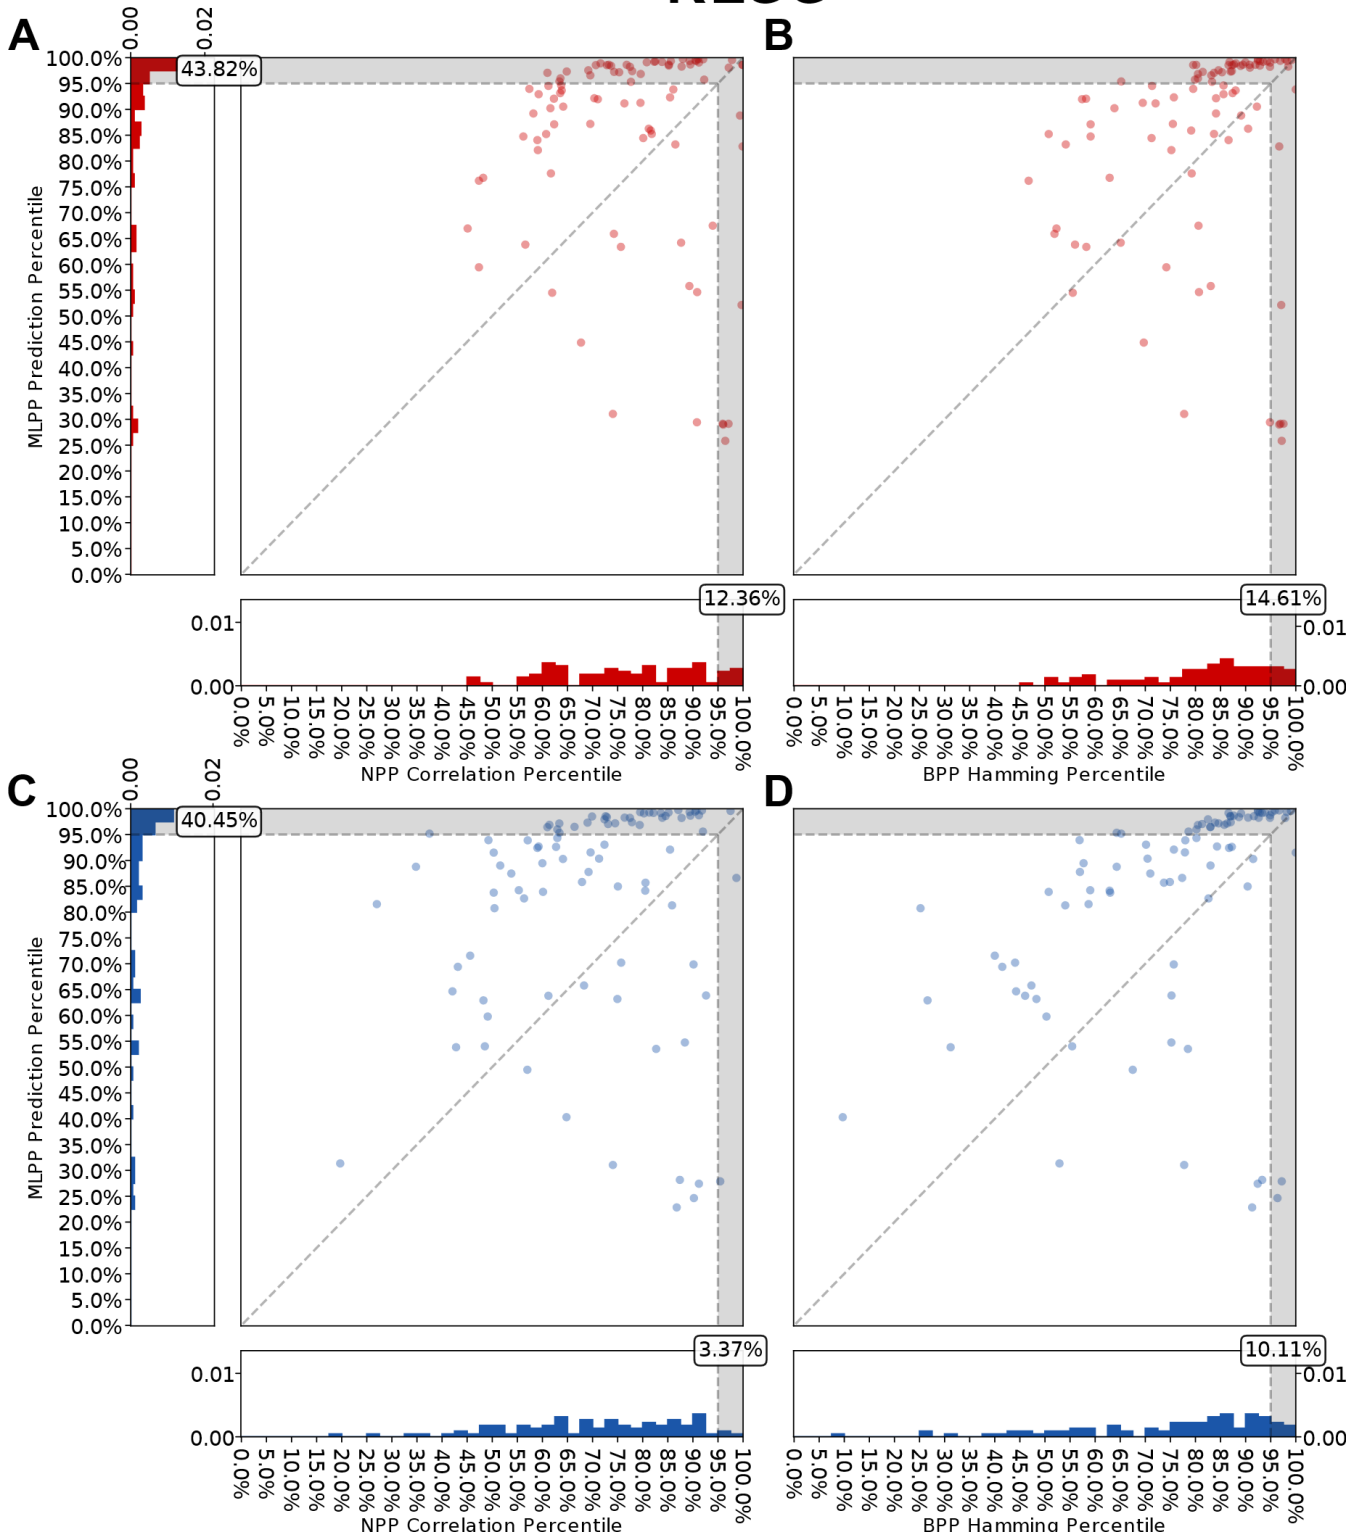

# CORUM

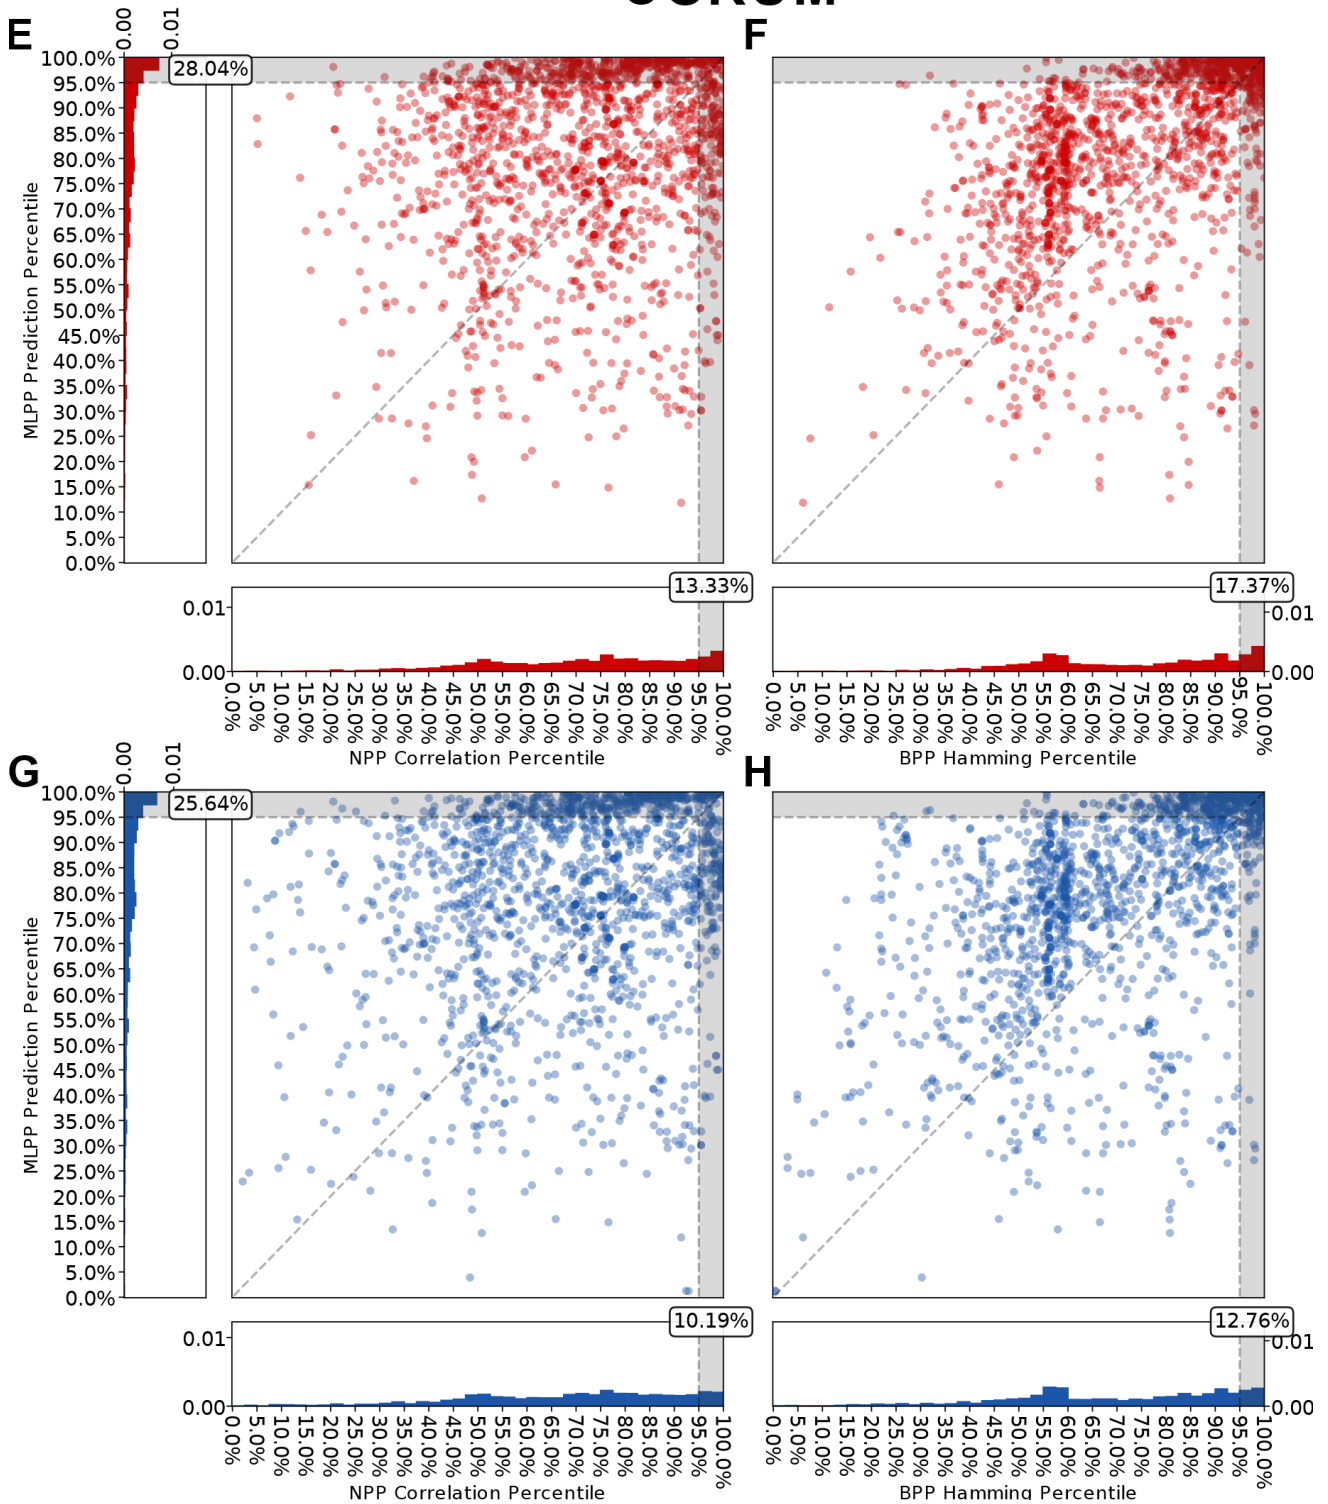

**Performance Comparison on the Pathway Level -** (A-H) Median score percentile for a gene set. Each dot is a single KEGG pathway (A-D) or CORUM complex (E-H) compared based on the score percentile in MLPP (y-axis) or in a different phylogenetic profiling approach (x-axis) - NPP (A, C, E, G) or BPP (B, D, F, H). Being above the diagonal dashed line indicates that the MLPP outperformed the other method for this gene set and vice versa. Gray percentile boxes show the percent of gene sets with a median score in the top 5% of scores for either MLPP (y-axis) or the compared approach (x-axis). Marginal histograms show the distribution of median score percentile of gene sets on the corresponding axis. Model evaluation was conducted with pairs of paralogs (A, B, E, F - in red) or without (C, D, G, H - in blue). MLPP - machine learning phylogenetic profiling (the method presented in this paper), NPP - normalized phylogenetic profiling, BPP - Hamming distance on binarized phylogenetic profiles. Source data are provided as a Source Data file.

## Supplementary Figure 12 - Clusters

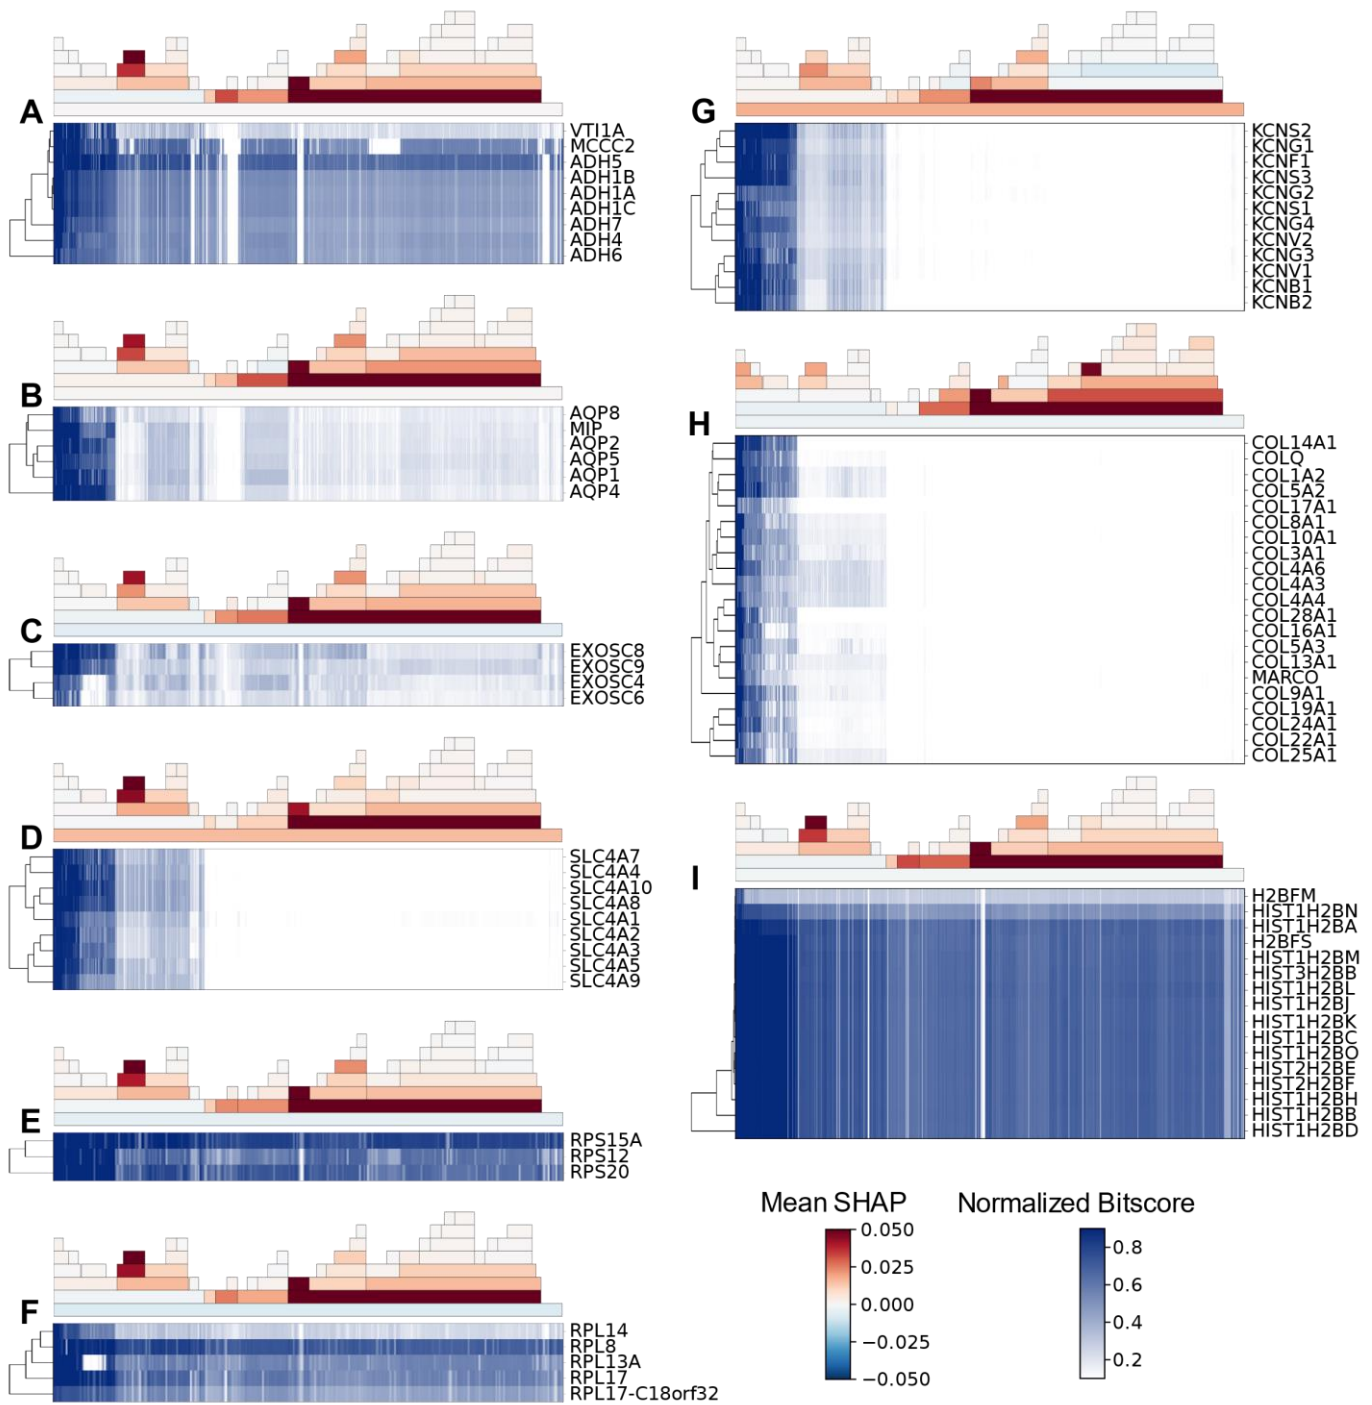

**Specific Clusters** - Model predictions for functional interaction were clustered using hierarchical clustering and cut at a specific heights corresponding to percentiles (top 0.05%, 0.1%, 0.5%, 1%, 2%, 2.5%) to produce clusters. For each of the clusters A-I, the top part is the clade importance for each clade as calculated using the mean SHAP value with species ordered from close (left) to distant (right) from human. The bottom part is the phylogenetic profile as self-hit normalized bitscores (1 - bitscore equal to self-hit, 0 - non-detected).



### Supplementary Figure 13 - Distribution of Pubmed Mentions

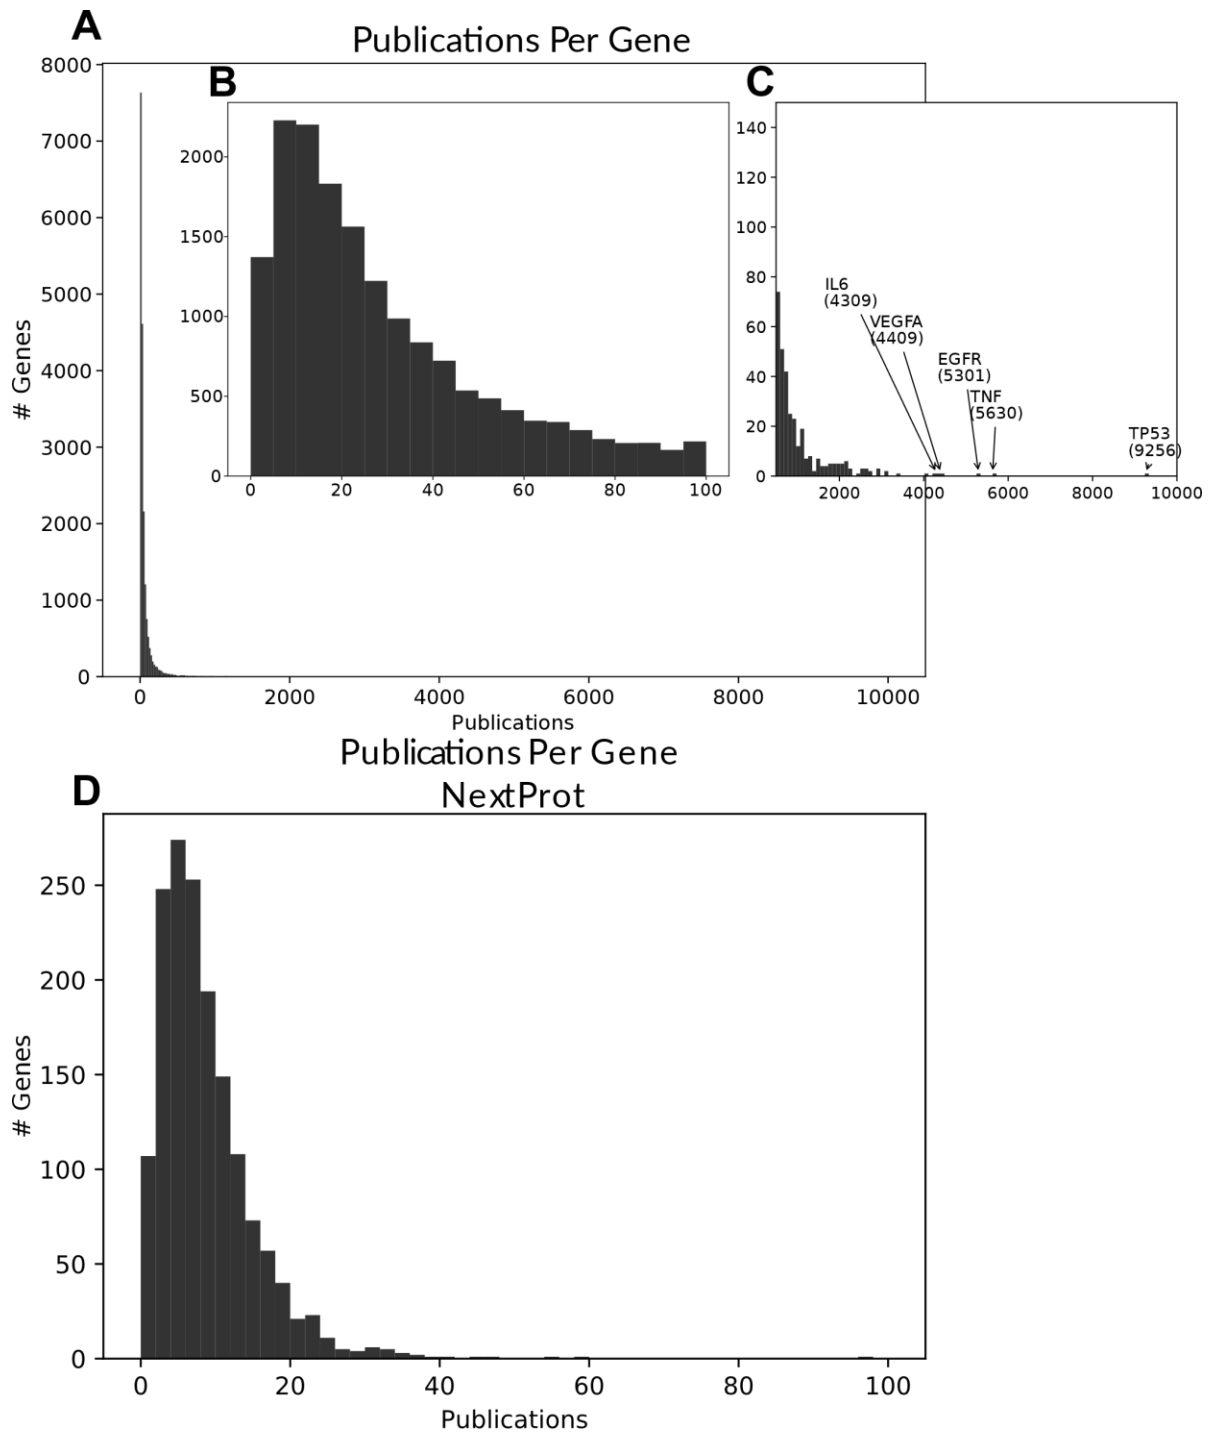

**Distribution of Pubmed Mentions** - (A-D) Histograms of Gene2Pubmed data mention counts per gene. (A) Distribution of Pubmed mentions for all genes. (B) Distribution of Pubmed mentions for genes with less than 100 mentions. (C) Distributions of Pubmed mentions for genes with more than 500 mentions. The top five most-mentioned genes are denoted by name with literature mention counts in brackets. (D) Distribution of Pubmed mentions for genes denoted as uncharacterized by NeXtProt (see Methods).

# Supplementary Figure 14 – PathScore Distribution

## Reactome Top-Level Pathways

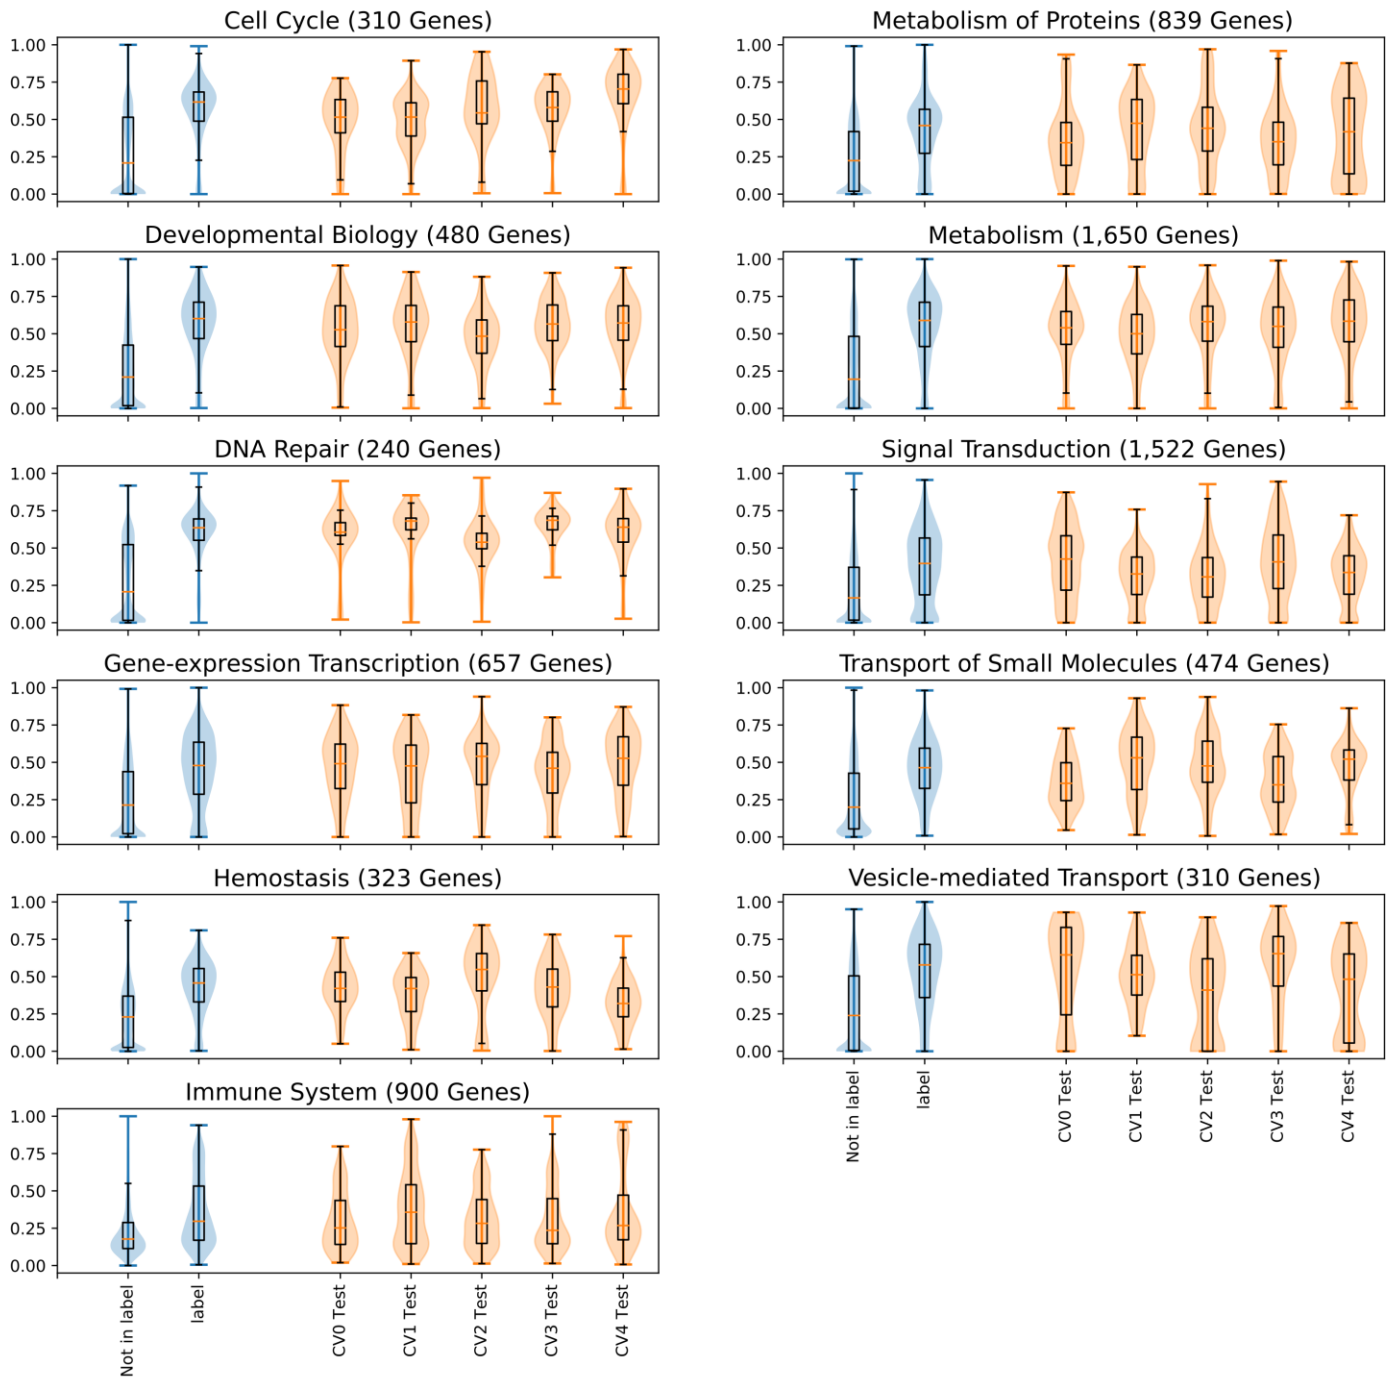

# GO-BP

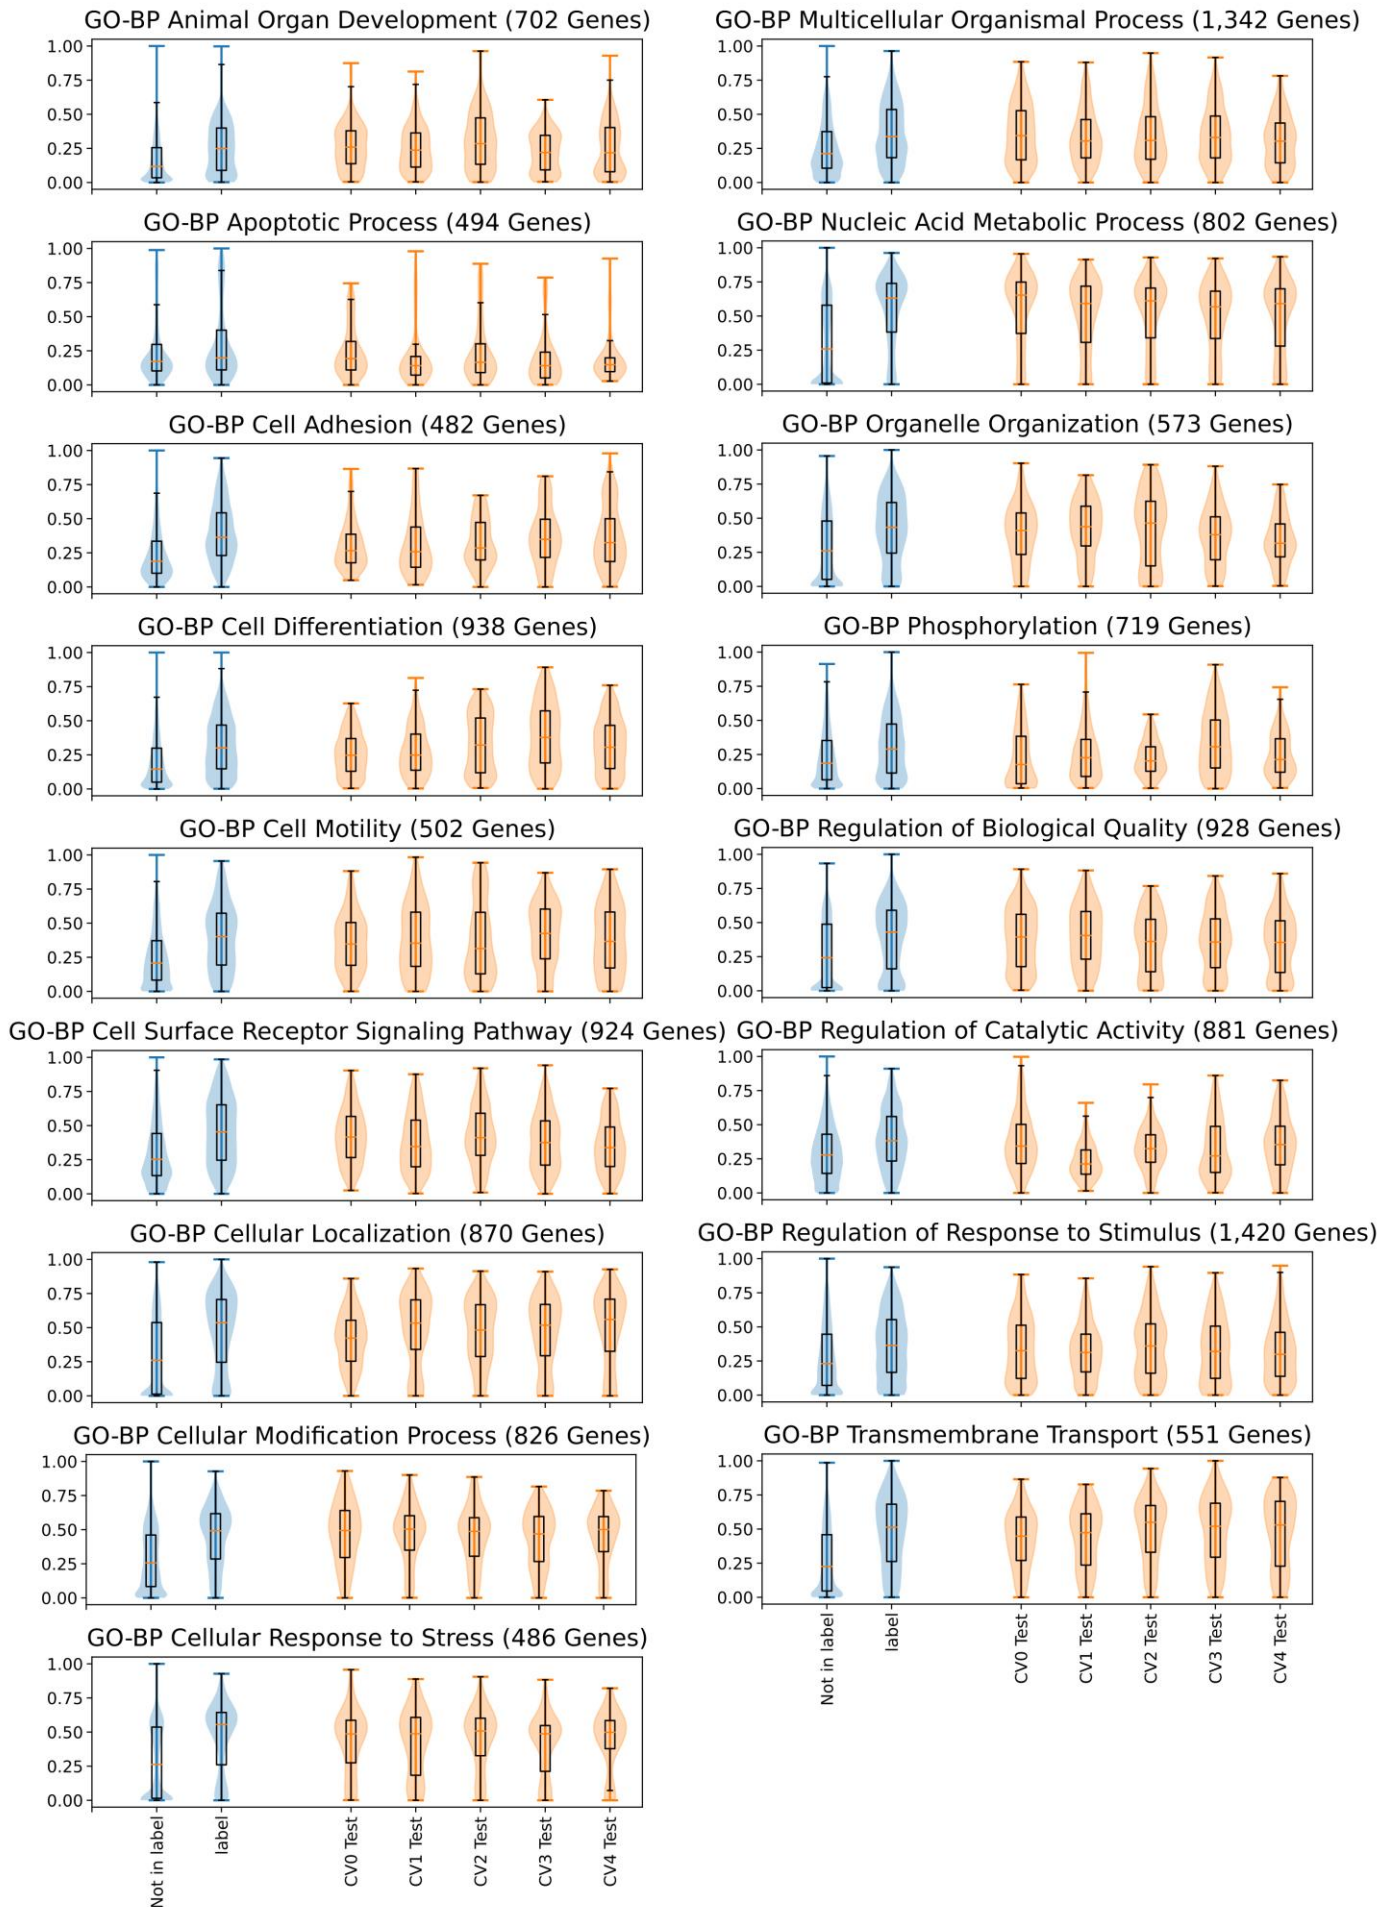

## GO-CC

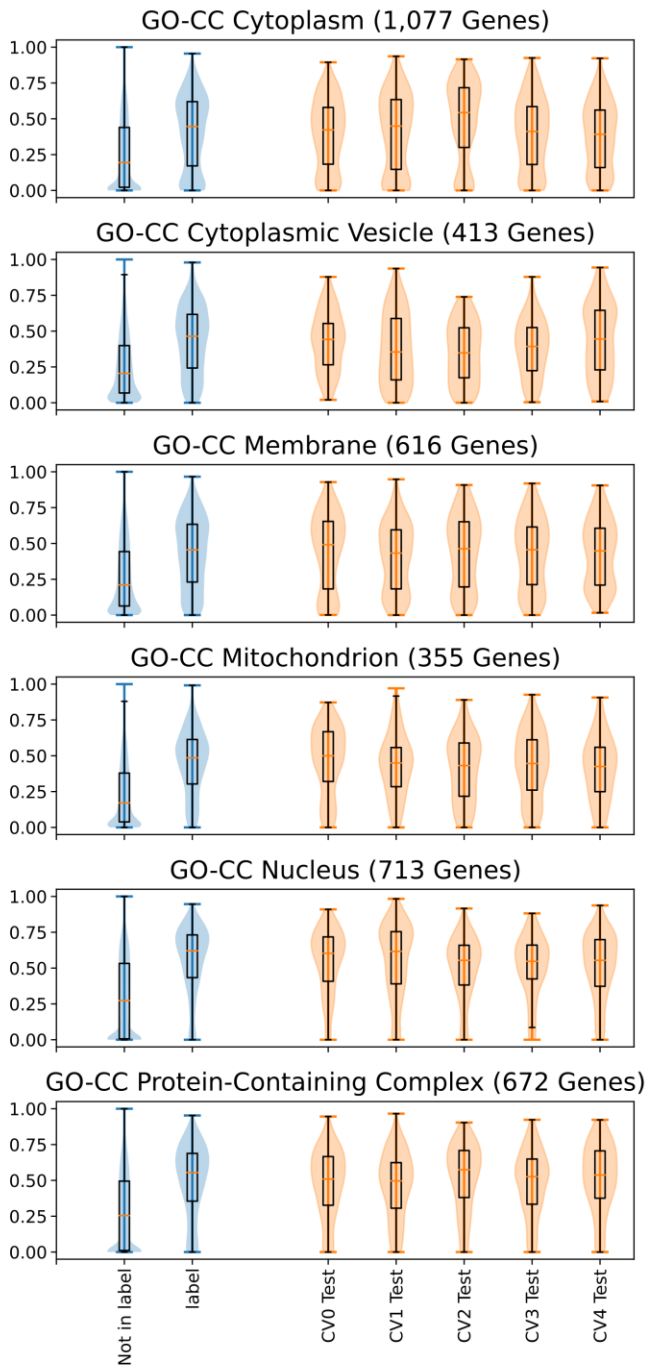

## GO-MF

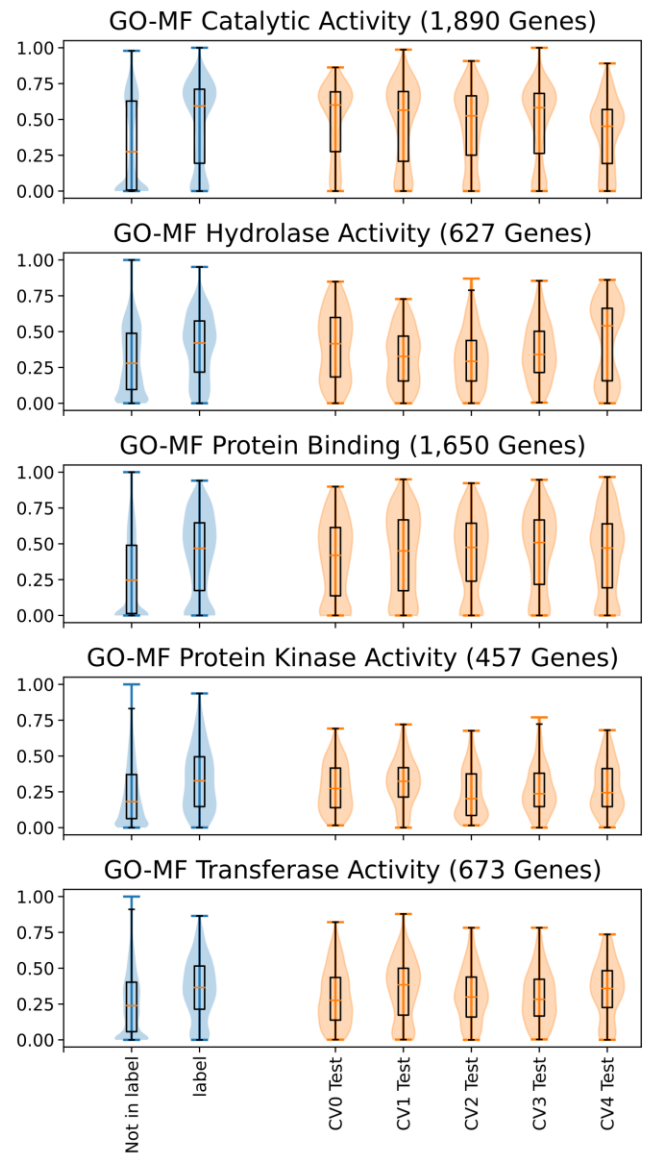

**PathScore Distributions** – PathScore distributions are presented as violin plots and overlying boxplot for each pathway type (“label”, as described by the title of each panel). Violin plots are shown for genes annotated for this pathway-type (“label”) and all other genes (“Not in label”). PathScore is also shown for genes in the pathway-type found exclusively in the test-set across five cross-validations (“CV0-CV4 Test”). Genes known to belong to each of the labels have higher PathScore scores than other genes, which is robust when these genes are found exclusively in the test set. The boxplot extends from the lower to upper quartile values of the data, with an orange line at the median. Whiskers denote 1.5 times the interquartile range.

# Supplementary Figure 15 – PathScore Performance

**A**

Precision for Reactome Pathway Types

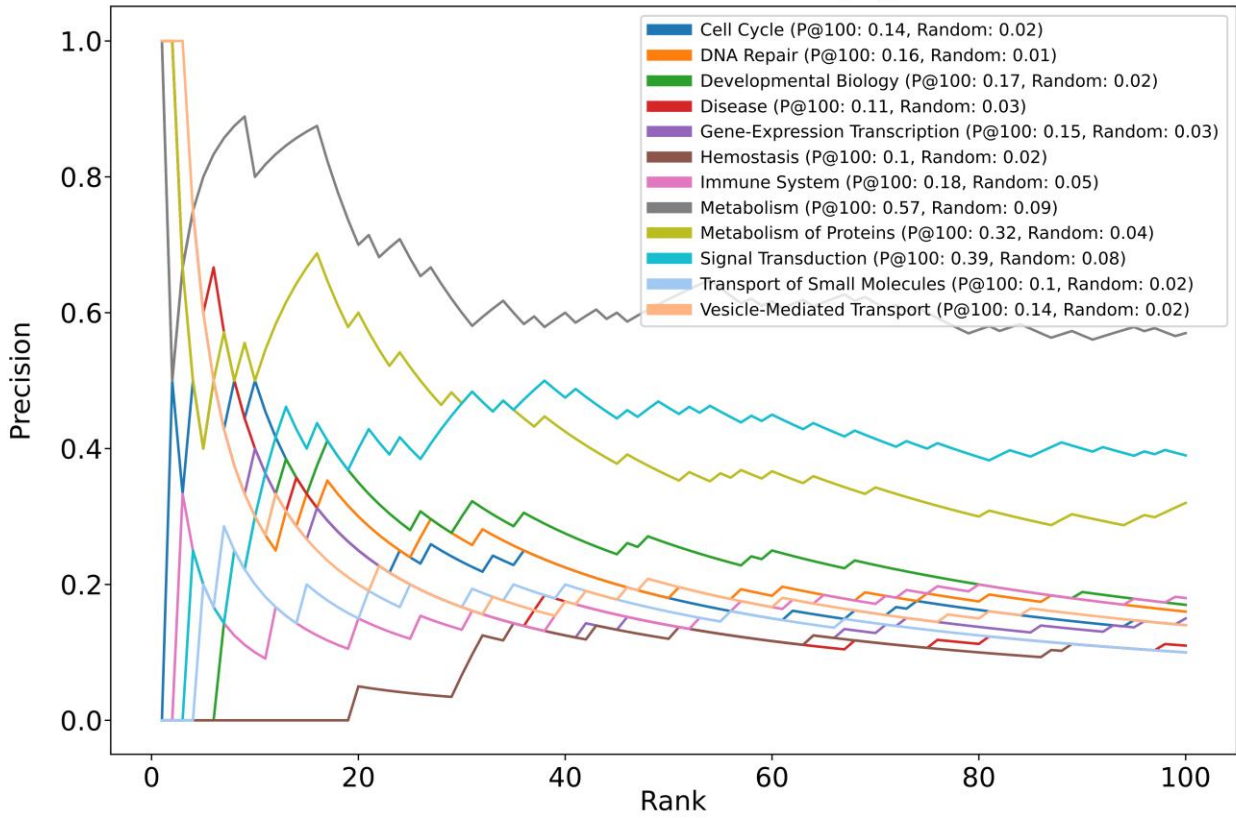

**B**

Precision for GO-BP Pathway Types

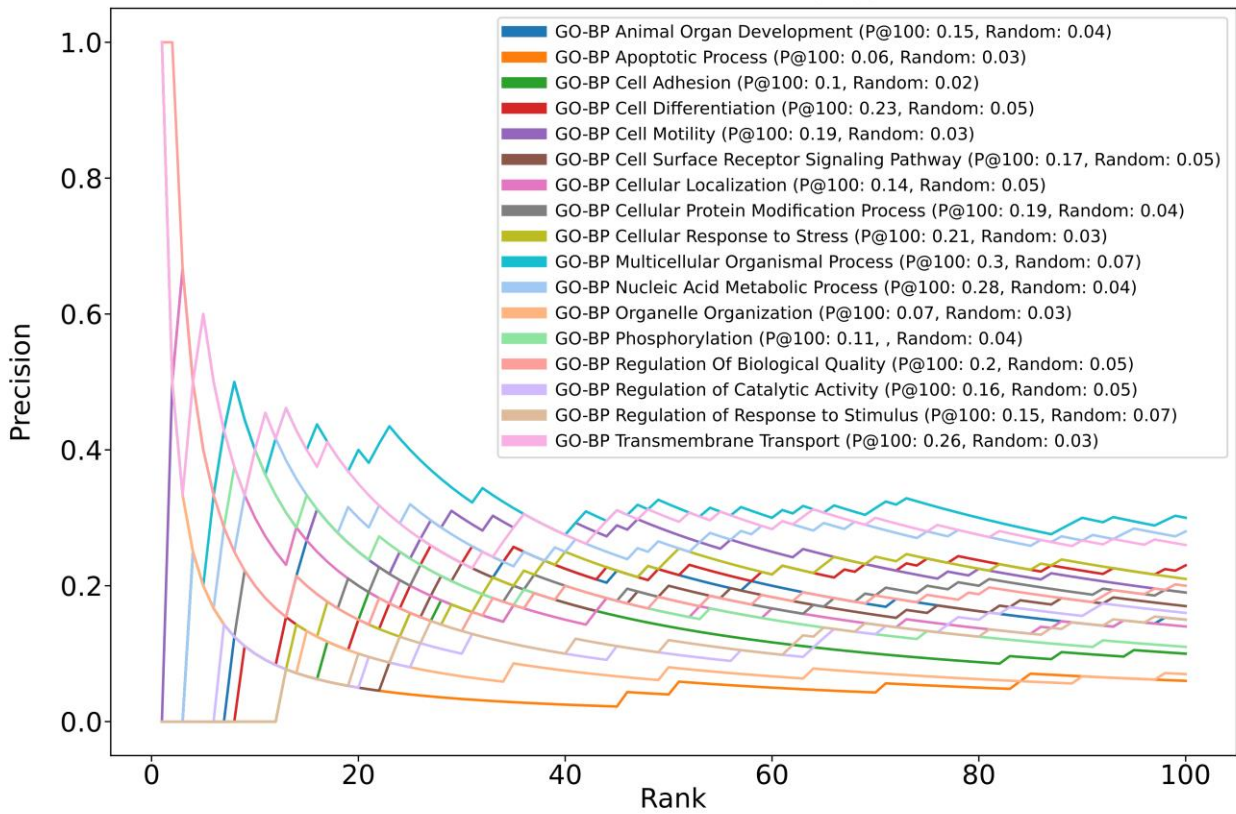

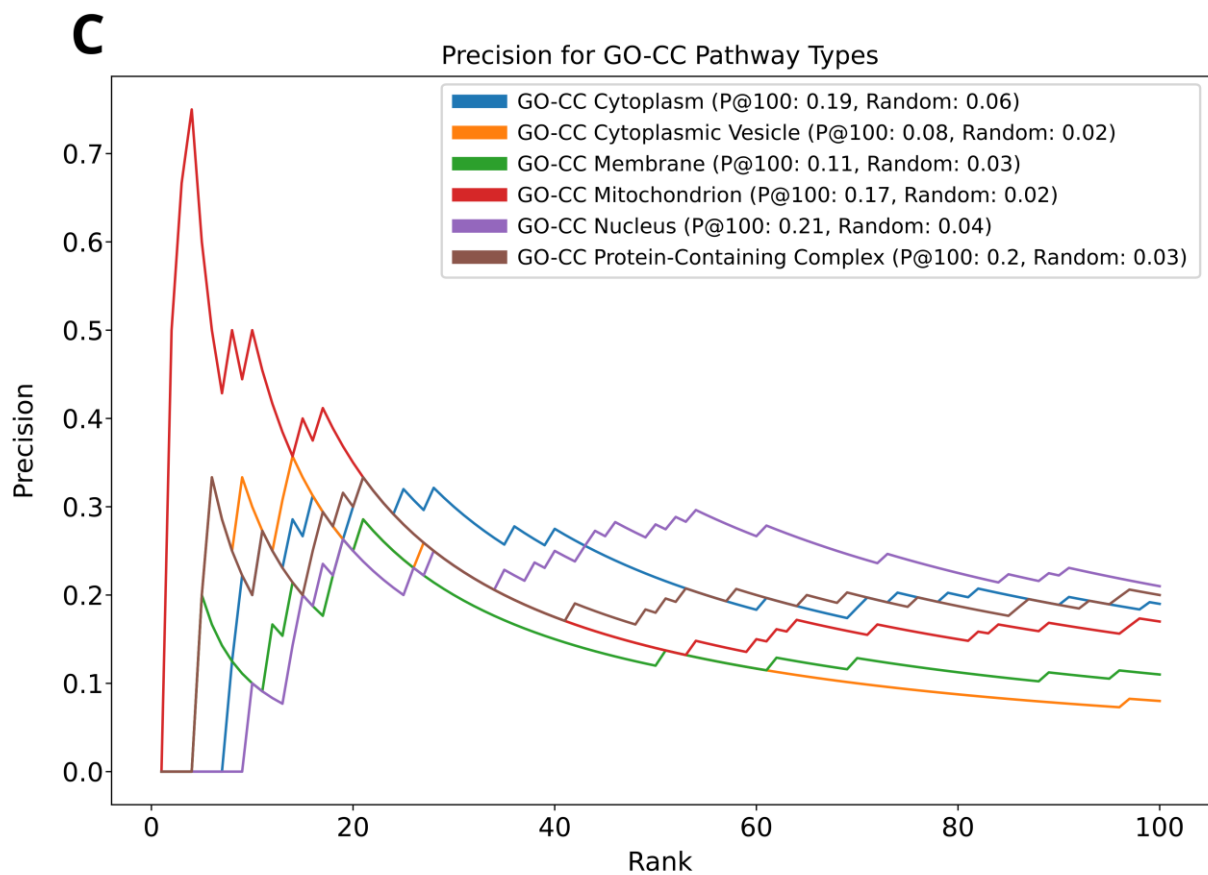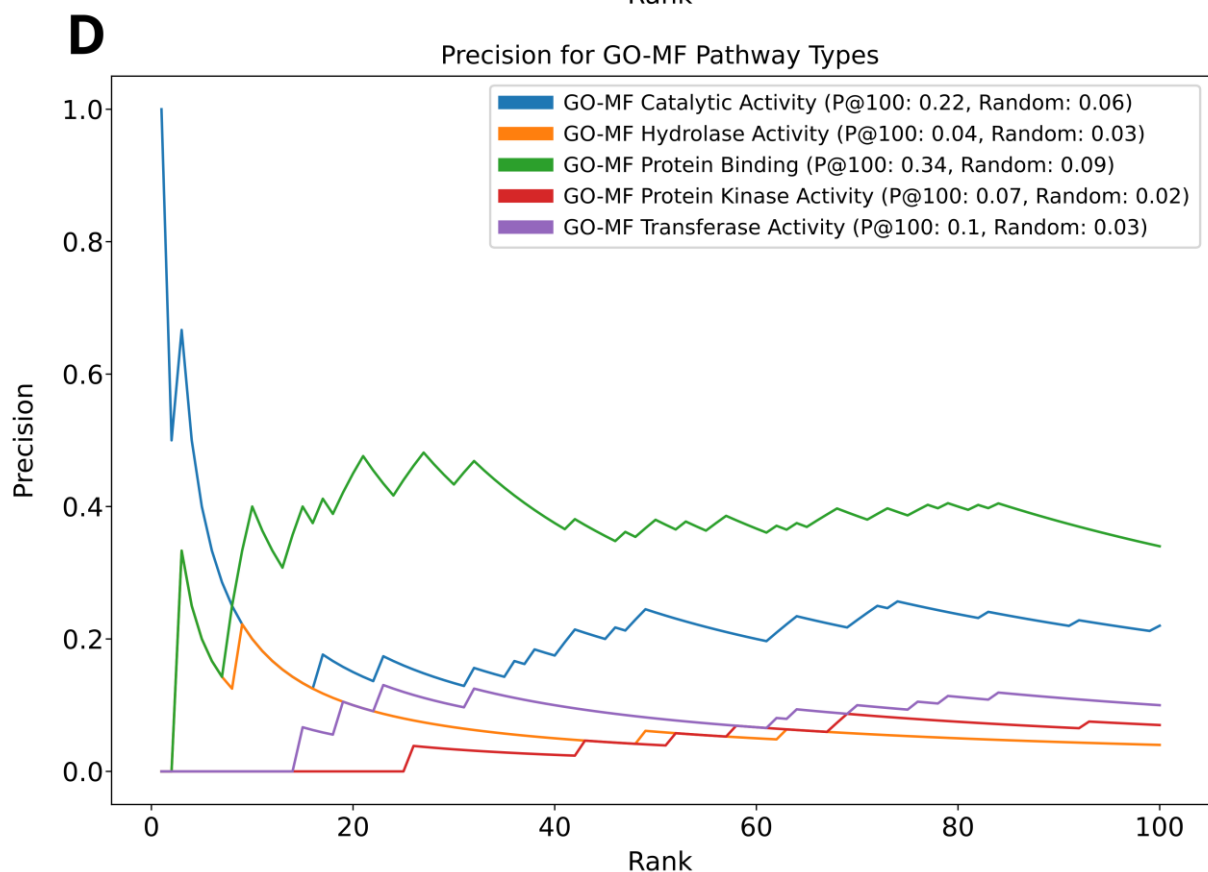

**PathScore performance** – Performance of PathScore functional annotations measured as precision at rank K for genes associated with the pathway-type. Pathway-types are grouped by source to Reactome (A), GO-BP (B), GO-CC (C), and GO-MF (D). Shown are top 100 ranks. Pathway types are denoted in the legend with the precision at rank 100 compared to random (frequency of genes associated with the pathway type). GO – gene ontology, BP – biological process, CC – cellular compartment, MF – molecular function. Source data are provided as Supplementary Data 3.

## Supplementary Figure 16 - Clade Importance - Interaction Context Models

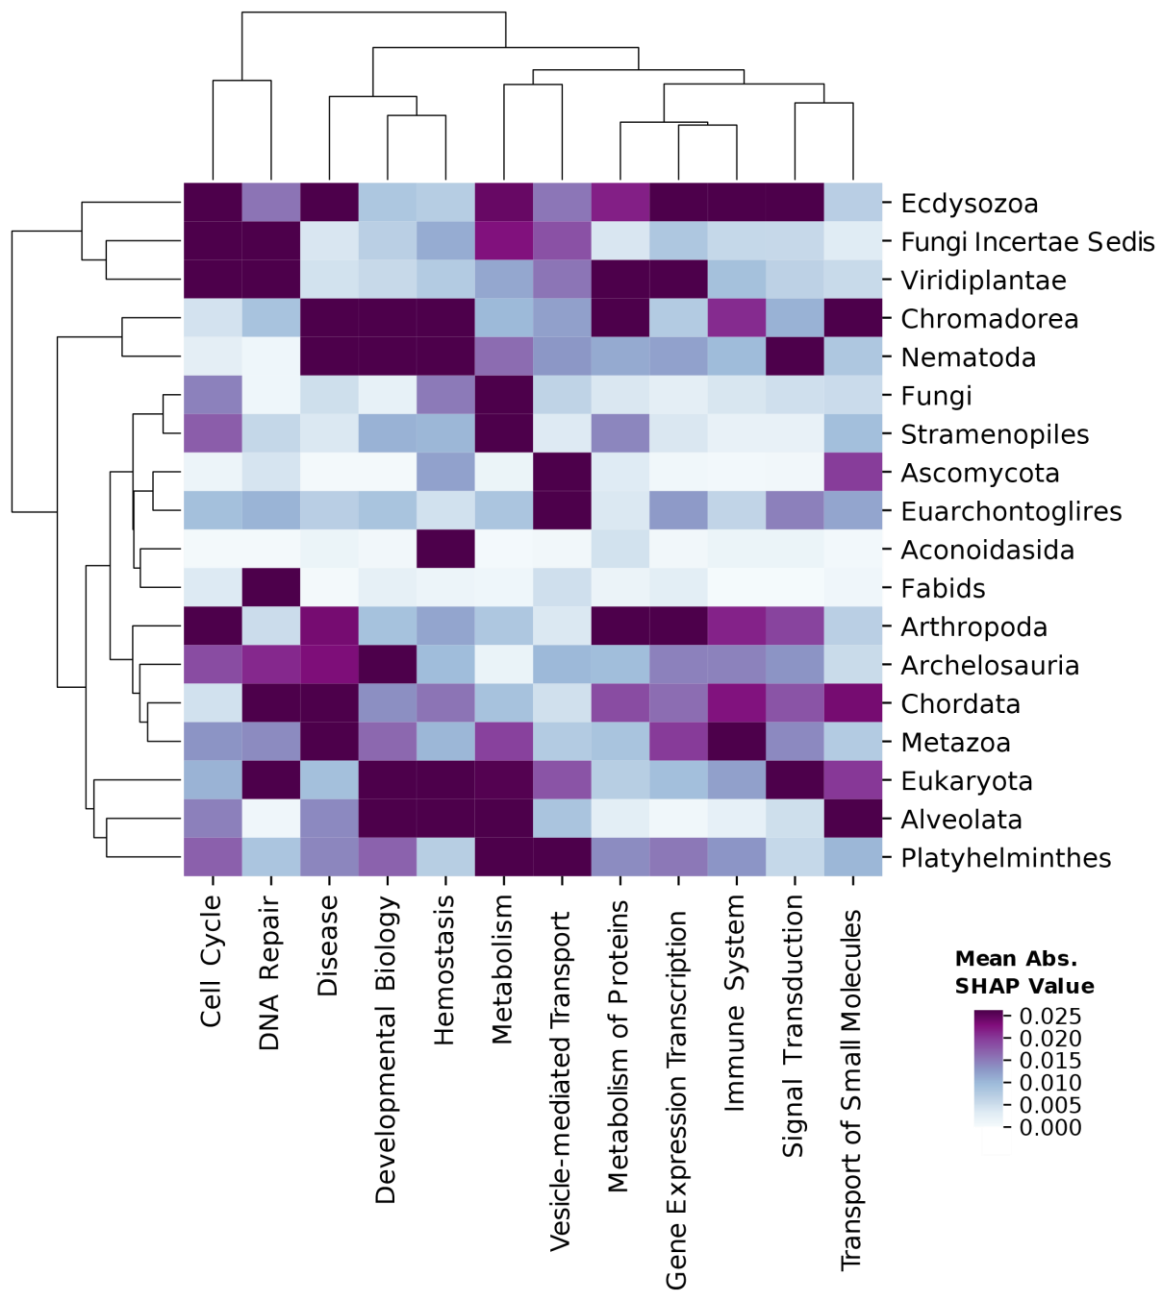

**Heatmap of Clade Importance for Interaction Context Models** - Clade importance calculated by SHAP values for the test set of a single cross-validation in each of the interaction context models, revealing the clades with the highest mean absolute importance. Shown are only clades with a maximal mean absolute SHAP value above 0.025.

## Supplementary Figure 17 - UMAP Projection of SHAP Values for Gene Pairs

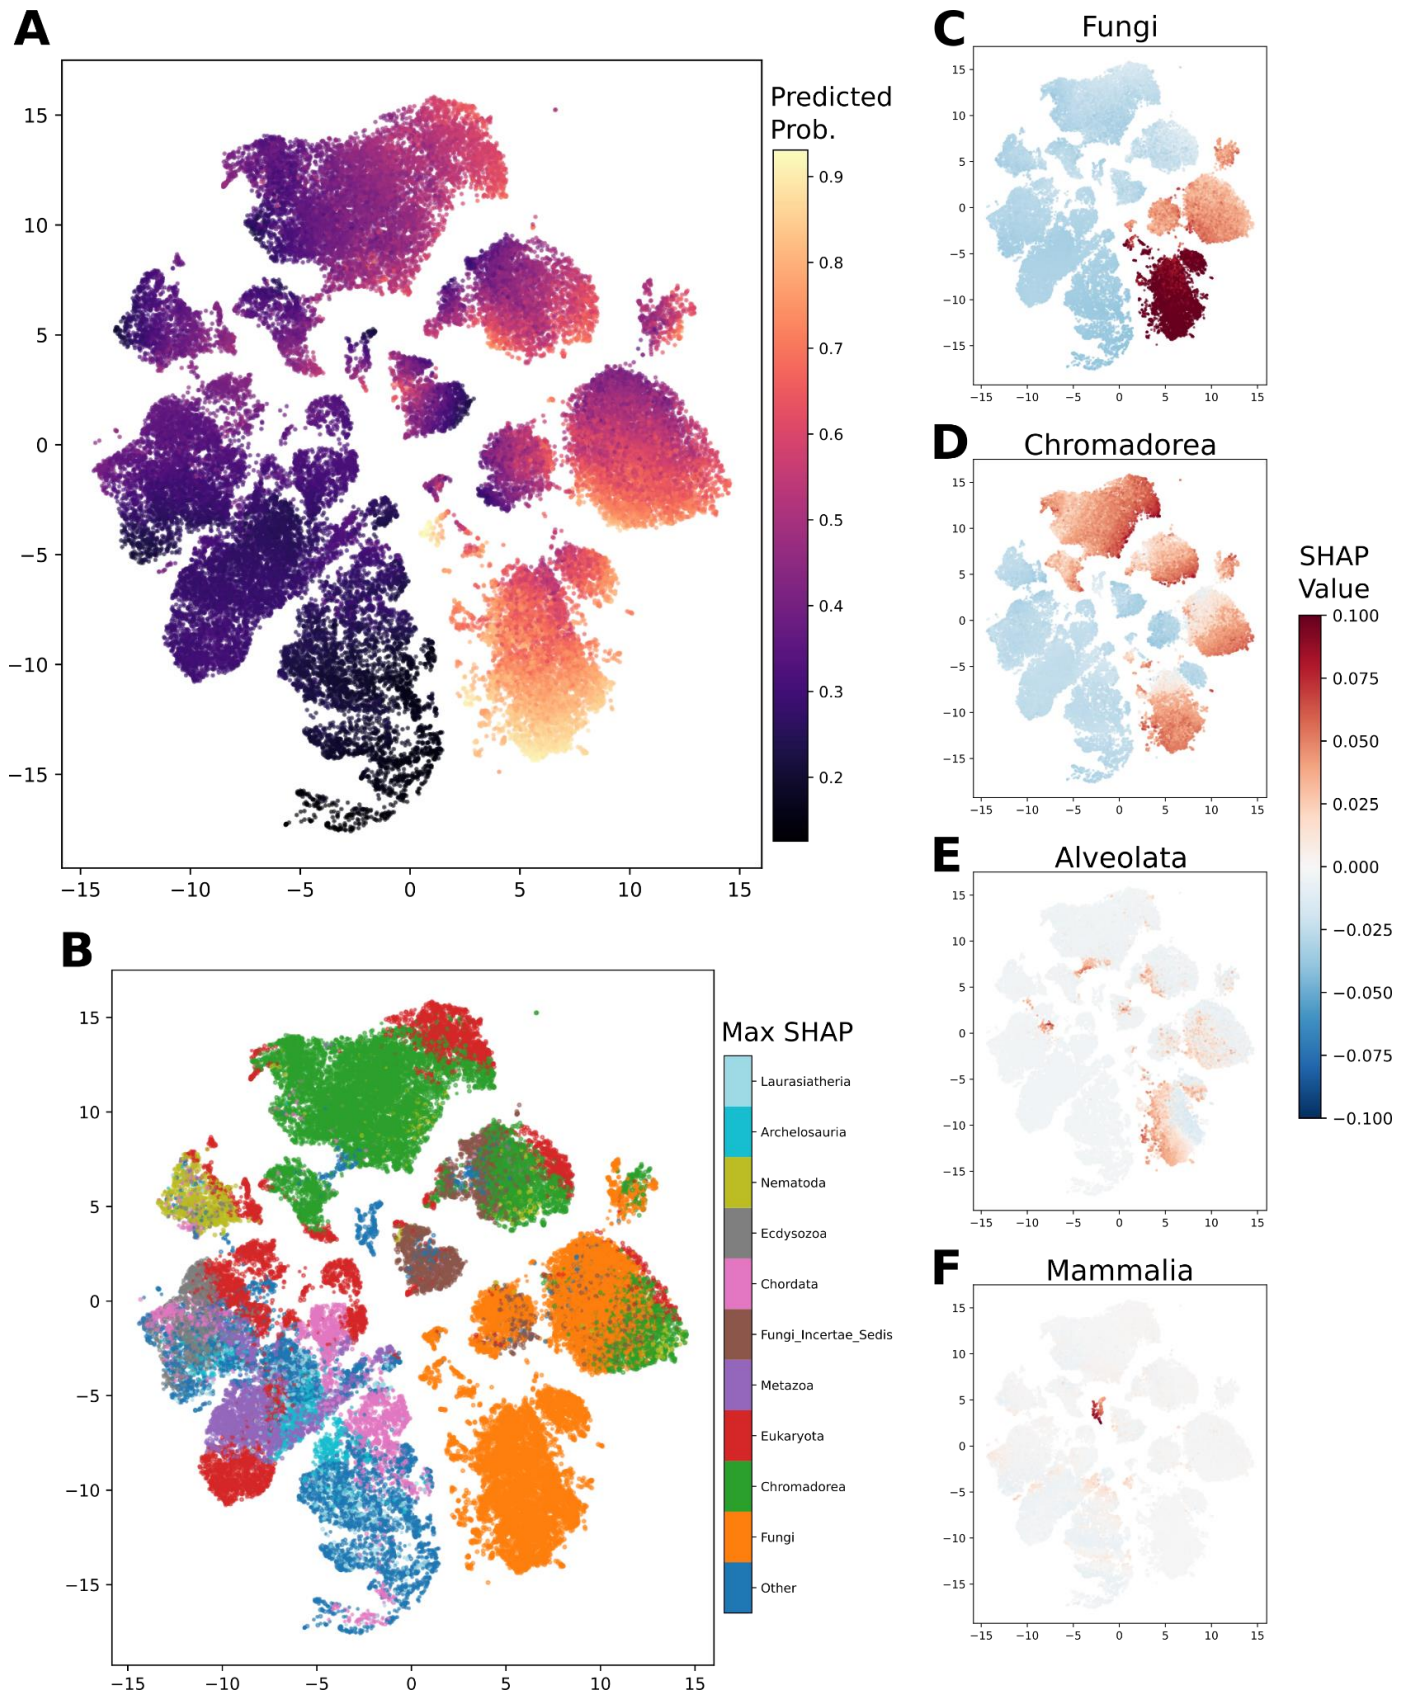

**UMAP projection of SHAP values for gene pairs** - (A) UMAP projection of SHAP values for gene-pairs in the test set of the Functional Interaction MLPP model (for the first cross-validation). Each dot is a gene-pair, colored by the total predicted probability for functional interaction for that pair. (B) Each gene-pair is colored by the clade with the highest SHAP value for this gene-pair. (C-F) Each gene-pair is colored by the SHAP value of a specific clade - Fungi (C), Chromadorea (D), Alveolata (E), Mammalia (F).



## Supplementary Figure 18 – Clade Importance of Models Excluding Parasites

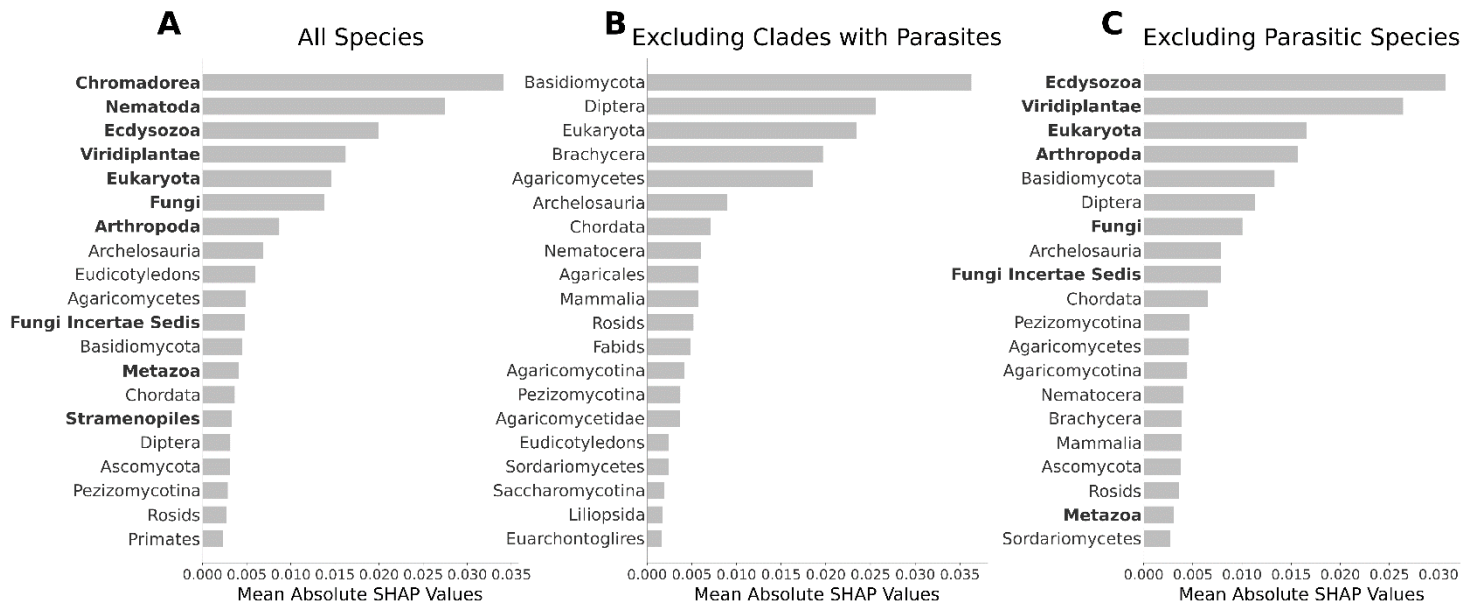

**Clade Importance of Models Excluding Parasites – (A-C)** Clade importance as mean absolute SHAP values of models trained to predict functional interactions in Reactome with all species (A), excluding parasitic species (B) and excluding all clades with any parasitic species (C). Clades in bold contain parasitic species.

## Supplementary References

1. Park, Y. & Marcotte, E. M. Flaws in evaluation schemes for pair-input computational predictions. *Nature Methods* **9**, 1134–1136 (2012).
2. Duek, P., Gateau, A., Bairoch, A. & Lane, L. Exploring the Uncharacterized Human Proteome Using neXtProt. *Journal of Proteome Research* *acs.jproteome.8b00537* (2018) doi:10.1021/acs.jproteome.8b00537.
